# Supplementary material for: Sulfonyl radical triggered selective iodosulfonylation and bicyclization of 1,6-dienes
Source: Royal Society of Chemistry journal article supplement (doi:10.1039/d1cc03252f), 2021-01-01
Supplement: d1cc03252f1.pdf [file d1cc03252f1.pdf]

# Sulfonyl Radical Triggered Selective Iodosulfonylation and Bicyclizations of 1,6-Dienes

Shi-Ping Wu,<sup>a</sup> Dong-Kai Wang,<sup>a</sup> Qing-Qing Kang,<sup>a</sup> Guo-Ping Ge,<sup>a</sup> Hongxing Zheng,<sup>b</sup>  
Meiling Zhu,<sup>c</sup> Ting Li,<sup>\*c</sup> Jun-Qi Zhang,<sup>d</sup> and Wen-Ting Wei<sup>\*a</sup>

<sup>a</sup> Key Laboratory of Advanced Mass Spectrometry and Molecular Analysis of Zhejiang Province, State Key Laboratory for Managing Biotic and Chemical Threats to the Quality and Safety of Agro-products, School of Materials Science and Chemical Engineering, Ningbo University, Ningbo, Zhejiang, 315211, China.

<sup>b</sup> Institution of Functional Organic Molecules and Materials, School of Chemistry and Chemical Engineering, Liaocheng University, Liaocheng, Shandong, 252059, China.

<sup>c</sup> College of Chemistry and Pharmaceutical Engineering, Nanyang Normal University, Nanyang, Henan, 473061, China.

<sup>d</sup> Advanced Research Institute and Department of Chemistry, Taizhou University, 1139 Shifu Avenue, Taizhou, 318000, China.

E-mail: [weiwenting@nbu.edu.cn](mailto:weiwenting@nbu.edu.cn)

## Supporting Information

### List of Contents

|                                                                         |               |
|-------------------------------------------------------------------------|---------------|
| <b>(A) Typical experimental procedure for the selective cyclization</b> | <b>S2</b>     |
| <b>(B) Analytical data</b>                                              | <b>S2-19</b>  |
| <b>(C) Reference</b>                                                    | <b>S20</b>    |
| <b>(D) Spectra</b>                                                      | <b>S21-58</b> |
| <b>(E) The X-ray single-crystal diffraction analysis of product 3a</b>  | <b>S59-70</b> |

### (A) Typical experimental procedure for the selective cyclization

To a Schlenk tube were added 1,6-dienes **1** (0.2 mmol), sulfonyl hydrazides **2** (0.4 mmol), CuI (1.2 equiv), TBHP (2.0 equiv), and MeCN (2.0 mL). Then the tube was stirred at 90 °C sealed in air for the indicated time until complete consumption of starting material as monitored by TLC and/or GC-MS analysis. After the reaction was finished, the mixture was extracted three times with EtOAc. The organic layer was dried over Na<sub>2</sub>SO<sub>4</sub>, filtration and evaporation of the solvent. The mixture was purified by flash column chromatography over silica gel (hexane/ethyl acetate = 3:1) to afford the desired products **4**.

To a Schlenk tube were added 1,6-dienes **1** (0.2 mmol), sulfonyl hydrazides **2** (0.4 mmol), Cu(OAc)<sub>2</sub> (20 mol%), TBHP (2.0 equiv), and MeCN (2.0 mL). Then the tube was stirred at 90 °C sealed in air for the indicated time until complete consumption of starting material as monitored by TLC and/or GC-MS analysis. After the reaction was finished, the mixture was extracted three times with EtOAc. The organic layer was dried over Na<sub>2</sub>SO<sub>4</sub>, filtration and evaporation of the solvent. The mixture was purified by flash column chromatography over silica gel (hexane/ethyl acetate = 6:1) to afford the desired products **3**.

### (B) Analytical data

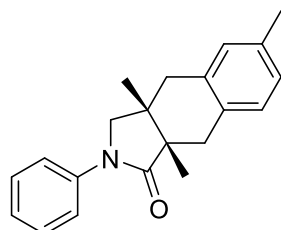

**3a,6,9a-Trimethyl-2-phenyl-2,3,3a,4,9,9a-hexahydro-1H-benzo[f]isoindol-1-one (3a)**, white solid (0.0439 g, 72% yield,

d.r. > 20:1);  $^1\text{H}$  NMR (500 MHz,  $\text{CDCl}_3$ )  $\delta$ : 7.45 (d,  $J = 7.5$  Hz, 2H), 7.29 (t,  $J = 8.0$  Hz, 2H), 7.09 (t,  $J = 7.5$  Hz, 1H), 6.97 (t,  $J = 3.5$  Hz, 2H), 6.92 (t,  $J = 9.5$  Hz, 1H), 3.54 (t,  $J = 4.5$  Hz, 1H), 3.42 (d,  $J = 9.5$  Hz, 1H), 3.10 (d,  $J = 15.5$  Hz, 1H), 2.71 (d,  $J = 14.5$  Hz, 1H), 2.64 (d,  $J = 14.5$  Hz, 1H), 2.58 (d,  $J = 15.5$  Hz, 1H), 2.28 (s, 3H), 1.27 (s, 3H), 1.21 (s, 3H);  $^{13}\text{C}$  NMR (125 MHz,  $\text{CDCl}_3$ )  $\delta$ : 178.1, 139.4, 136.1 (2), 133.3, 128.7, 128.6, 127.4, 127.0, 124.5, 120.1, 59.5, 49.2, 41.8, 38.9, 38.2, 24.0, 21.1, 21.0; HRMS  $m/z$  (ESI) calcd for  $\text{C}_{21}\text{H}_{24}\text{NO}$  ( $[\text{M}+\text{H}]^+$ ) 306.1852, found 306.1856.

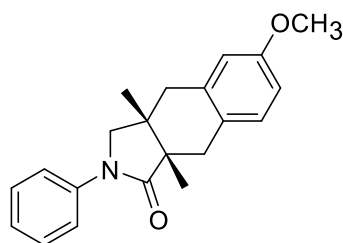

**6-Methoxy-3a,9a-dimethyl-2-phenyl-2,3,3a,4,9,9a-hexahydro-1H-benzo[f]isoindol-1-one (3b)**, white solid

(0.0475 g, 74% yield, d.r. > 20:1);  $^1\text{H}$  NMR (500 MHz,  $\text{CDCl}_3$ )  $\delta$ : 7.46 (d,  $J = 8.0$  Hz, 2H), 7.29 (t,  $J = 8.0$  Hz, 2H), 7.09 (t,  $J = 7.5$  Hz, 1H), 6.99 (d,  $J = 8.0$  Hz, 1H), 6.72 (d,  $J = 2.5$  Hz, 1H), 6.68-6.66 (m, 1H), 3.75 (s, 3H), 3.54 (d,  $J = 9.5$  Hz, 1H), 3.42 (d,  $J = 9.5$  Hz, 1H), 3.12 (d,  $J = 15.5$  Hz, 1H), 2.69 (t,  $J = 7.5$  Hz, 1H), 2.62-2.57 (m, 2H), 1.27 (s, 3H), 1.20 (s, 3H);  $^{13}\text{C}$  NMR (125 MHz,  $\text{CDCl}_3$ )  $\delta$ : 178.1, 158.4, 139.4, 137.5, 128.8, 128.5, 128.4, 124.5, 120.2, 113.2, 112.1, 59.5, 55.3, 49.2, 41.4, 39.2, 38.2, 23.9, 21.0; HRMS  $m/z$  (ESI) calcd for  $\text{C}_{21}\text{H}_{24}\text{NO}_2$  ( $[\text{M}+\text{H}]^+$ ) 322.1802, found 322.1808.

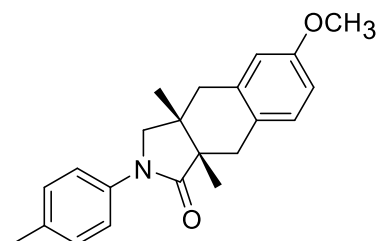

**6-Methoxy-3a,9a-dimethyl-2-(p-tolyl)-2,3,3a,4,9,9a-hexahydro-1H-benzo[f]isoindol-1-one (3c)**, white solid

(0.0503 g, 75% yield, d.r. > 20:1);  $^1\text{H}$  NMR (500 MHz,  $\text{CDCl}_3$ )  $\delta$ : 7.31 (d,  $J = 8.5$  Hz, 2H), 7.09 (d,  $J = 8.5$  Hz, 2H), 6.98 (d,  $J = 8.0$  Hz, 1H), 6.72 (d,  $J = 2.0$  Hz, 1H), 6.68-6.66 (m, 1H),

3.75 (s, 3H), 3.52 (d,  $J = 9.5$  Hz, 1H), 3.38 (d,  $J = 10.0$  Hz, 1H), 3.11 (d,  $J = 15.5$  Hz, 1H), 2.68 (t,  $J = 7.5$  Hz, 1H), 2.59 (t,  $J = 14.0$  Hz, 2H), 2.28 (s, 3H), 1.27 (s, 3H), 1.20 (s, 3H);  $^{13}\text{C}$  NMR (125 MHz,  $\text{CDCl}_3$ )  $\delta$ : 177.9, 158.4, 137.6, 136.8, 134.3, 129.3, 128.5, 128.3, 120.3, 113.2, 112.1, 59.8, 55.3, 49.2, 41.5, 39.3, 38.3, 24.0, 21.0, 20.8; HRMS  $m/z$  (ESI) calcd for  $\text{C}_{22}\text{H}_{26}\text{NO}_2$  ( $[\text{M}+\text{H}]^+$ ) 336.1958, found 336.1950.

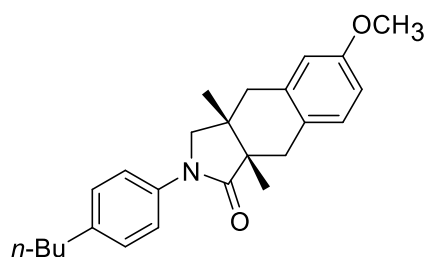

**2-(4-Butylphenyl)-6-methoxy-3a,9a-dimethyl-2,3,3a,4,9,9a-hexahydro-1H-benzo[f]isoindol-1-one (3d)**, white solid (0.0543 g, 72% yield, d.r. >

20:1);  $^1\text{H}$  NMR (500 MHz,  $\text{CDCl}_3$ )  $\delta$ : 7.36 (d,  $J =$

9.0 Hz, 2H), 7.11 (d,  $J = 9.5$  Hz, 2H), 6.99 (d,  $J = 10.0$  Hz, 1H), 6.72 (s, 1H), 6.67 (d,  $J = 9.5$  Hz, 1H), 3.76 (s, 3H), 3.52 (d,  $J = 12.0$  Hz, 1H), 3.39 (d,  $J = 11.5$  Hz, 1H), 3.11 (d,  $J = 18.5$  Hz, 1H), 2.66 (s, 1H), 2.61 (d,  $J = 12.5$  Hz, 1H), 2.57-2.51 (m, 3H), 1.54 (t,  $J = 9.0$  Hz, 2H), 1.32 (t,  $J = 8.5$  Hz, 2H), 1.27 (s, 3H), 1.20 (s, 3H), 0.90 (t,  $J = 8.5$  Hz, 3H);  $^{13}\text{C}$  NMR (125 MHz,  $\text{CDCl}_3$ )  $\delta$ : 177.8, 158.3, 139.3, 137.6, 137.0, 128.7, 128.6, 128.4, 120.1, 113.1, 112.0, 59.6, 55.3, 49.1, 41.4, 39.3, 38.2, 35.0, 33.7, 24.1, 22.3, 21.1, 14.0; HRMS  $m/z$  (ESI) calcd for  $\text{C}_{25}\text{H}_{32}\text{NO}_2$  ( $[\text{M}+\text{H}]^+$ ) 378.2428, found 378.2432.

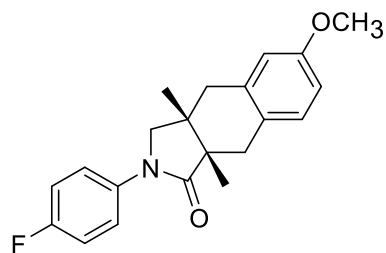

**2-(4-Fluorophenyl)-6-methoxy-3a,9a-dimethyl-2,3,3a,4,9,9a-hexahydro-1H-benzo[f]isoindol-1-one (3e)**, yellow oil (0.0461 g, 68% yield, d.r. > 20:1);  $^1\text{H}$

NMR (500 MHz,  $\text{CDCl}_3$ )  $\delta$ : 7.39-7.36 (m, 2H),

7.00-6.95 (m, 3H), 6.76 (s, 1H), 6.72 (d,  $J = 2.5$  Hz, 1H), 3.75 (s, 3H), 3.51 (d,  $J = 9.5$

Hz, 1H), 3.37 (d,  $J = 9.5$  Hz, 1H), 3.10 (d,  $J = 15.0$  Hz, 1H), 2.69-2.66 (m, 1H), 2.60 (t,  $J = 14.5$  Hz, 2H), 1.28 (s, 3H), 1.22 (s, 3H);  $^{13}\text{C}$  NMR (125 MHz,  $\text{CDCl}_3$ )  $\delta$ : 177.9, 159.0 (d,  $J_{\text{C-F}} = 242.8$  Hz), 158.4, 137.6, 135.3 (d,  $J_{\text{C-F}} = 2.9$  Hz), 128.4, 128.3, 122.0 (d,  $J_{\text{C-F}} = 7.9$  Hz), 115.4 (d,  $J_{\text{C-F}} = 22.3$  Hz), 113.0, 112.1, 59.9, 55.3, 49.1, 41.5, 39.3, 38.3, 24.0, 21.0;  $^{19}\text{F}$  NMR (471 MHz,  $\text{CDCl}_3$ )  $\delta$ : -117.6; HRMS  $m/z$  (ESI) calcd for  $\text{C}_{21}\text{H}_{23}\text{FNO}_2$  ( $[\text{M}+\text{H}]^+$ ) 340.1707, found 340.1701.

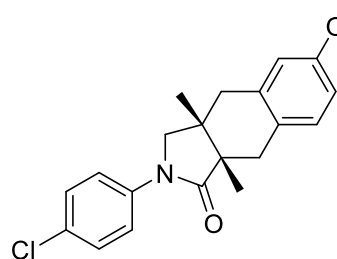

**2-(4-Chlorophenyl)-6-methoxy-3a,9a-dimethyl-2,3,3a,4,9,9a-hexahydro-1H-benzo[f]isoindol-1-one**

**(3f)**, colorless oil (0.0469 g, 66% yield, d.r. > 20:1);

$^1\text{H}$  NMR (500 MHz,  $\text{CDCl}_3$ )  $\delta$ : 7.42 (d,  $J = 9.0$  Hz, 2H), 7.25 (d,  $J = 10.5$  Hz, 2H), 6.99 (d,  $J = 9.5$  Hz, 1H), 6.72 (s, 1H), 6.68 (d,  $J = 10.0$  Hz, 1H), 3.76 (s, 3H), 3.51 (d,  $J = 11.5$  Hz, 1H), 3.38 (d,  $J = 11.5$  Hz, 1H), 3.10 (d,  $J = 18.0$  Hz, 1H), 2.68 (t,  $J = 9.0$  Hz, 1H), 2.61 (t,  $J = 16.0$  Hz, 2H), 1.28 (s, 3H), 1.22 (s, 3H);  $^{13}\text{C}$  NMR (125 MHz,  $\text{CDCl}_3$ )  $\delta$ : 178.1, 158.4, 137.8, 137.5, 129.5, 128.7, 128.6, 128.4, 121.1, 113.1, 112.0, 59.4, 55.3, 49.2, 41.4, 39.3, 38.2, 24.0, 21.1; HRMS  $m/z$  (ESI) calcd for  $\text{C}_{21}\text{H}_{23}\text{ClNO}_2$  ( $[\text{M}+\text{H}]^+$ ) 356.1412, found 356.1414.

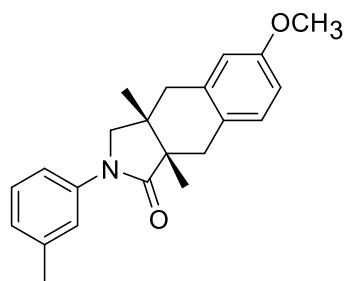

**6-Methoxy-3a,9a-dimethyl-2-(*m*-tolyl)-2,3,3a,4,9,9a-hexahydro-1H-benzo[f]isoindol-1-one (3g)**, white solid

(0.0489 g, 73% yield, d.r. > 20:1);  $^1\text{H}$  NMR (500 MHz,  $\text{CDCl}_3$ )  $\delta$ : 7.32 (s, 1H), 7.21-7.16 (m, 2H), 6.99 (d,  $J = 8.0$  Hz, 1H), 6.91 (d,  $J = 7.0$  Hz, 1H), 6.76 (s, 1H), 6.72 (d,  $J = 2.5$  Hz, 1H), 3.75 (s, 3H), 3.53 (d,  $J = 10.0$  Hz, 1H), 3.41 (d,  $J = 10.0$  Hz, 1H), 3.11 (d,  $J = 15.5$  Hz, 1H),

2.68 (d,  $J = 15.0$  Hz, 1H), 2.62-2.57 (m, 2H), 2.30 (s, 3H), 1.27 (s, 3H), 1.20 (s, 3H);  
 $^{13}\text{C}$  NMR (125 MHz,  $\text{CDCl}_3$ )  $\delta$ : 178.2, 158.4, 139.2, 138.7, 137.5, 128.6, 128.5, 128.4,  
 125.5, 121.1, 117.3, 113.2, 112.1, 59.8, 55.3, 49.2, 41.4, 39.2, 38.3, 24.0, 21.5, 21.0;  
 HRMS  $m/z$  (ESI) calcd for  $\text{C}_{22}\text{H}_{26}\text{NO}_2$  ( $[\text{M}+\text{H}]^+$ ) 336.1958, found 336.1962.

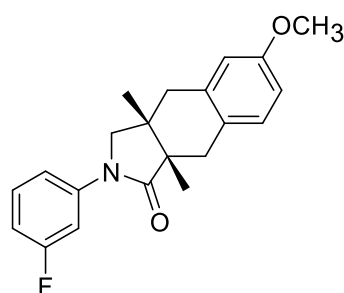

**2-(3-Fluorophenyl)-6-methoxy-3a,9a-dimethyl-2,3,3a,  
 4,9,9a-hexahydro-1H-benzo[f]isoindol-1-one (3h),**

yellow oil (0.0454 g, 67% yield, d.r. > 20:1);  $^1\text{H}$  NMR  
 (500 MHz,  $\text{CDCl}_3$ )  $\delta$ : 7.38 (d,  $J = 14.0$  Hz, 1H),

7.25-7.18 (m, 2H), 7.00 (d,  $J = 9.5$  Hz, 1H), 6.83-6.78 (m, 2H), 6.69 (t,  $J = 12.0$  Hz,  
 1H), 3.75 (s, 3H), 3.52 (d,  $J = 11.5$  Hz, 1H), 3.40 (d,  $J = 12.0$  Hz, 1H), 3.09 (t,  $J =$   
 17.5 Hz, 1H), 2.70-2.53 (m, 3H), 1.28 (s, 3H), 1.22 (s, 3H);  $^{13}\text{C}$  NMR (125 MHz,  
 $\text{CDCl}_3$ )  $\delta$ : 178.6, 162.5 (d,  $J_{\text{C-F}} = 303.9$  Hz), 158.4, 140.6 (d,  $J_{\text{C-F}} = 13.3$  Hz), 137.4,  
 129.9 (d,  $J_{\text{C-F}} = 11.5$  Hz), 128.4 (d,  $J_{\text{C-F}} = 12.5$  Hz), 116.1, 115.1 (d,  $J_{\text{C-F}} = 3.5$  Hz),  
 114.8, 112.5, 112.2, 59.5, 55.3, 49.5, 41.4, 39.2, 38.2, 24.0, 21.1;  $^{19}\text{F}$  NMR (471 MHz,  
 $\text{CDCl}_3$ )  $\delta$ : -111.5; HRMS  $m/z$  (ESI) calcd for  $\text{C}_{21}\text{H}_{23}\text{FNO}_2$  ( $[\text{M}+\text{H}]^+$ ) 340.1707, found  
 340.1703.

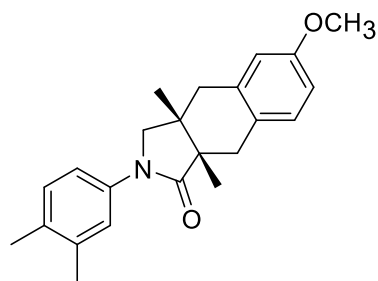

**2-(3,4-Dimethylphenyl)-6-methoxy-3a,9a-dimethyl-  
 2,3,3a,4,9,9a-hexahydro-1H-benzo[f]isoindol-1-one**

**(3i),** white solid (0.0531 g, 76% yield, d.r. > 20:1);  $^1\text{H}$   
 NMR (500 MHz,  $\text{CDCl}_3$ )  $\delta$ : 7.27 (d,  $J = 9.5$  Hz, 1H),

7.12 (d,  $J = 7.0$  Hz, 1H), 7.04 (d,  $J = 8.0$  Hz, 1H), 6.99 (d,  $J = 7.5$  Hz, 1H), 6.74 (d,  $J$   
 = 22.5 Hz, 1H), 6.67 (d,  $J = 7.5$  Hz, 1H), 3.76 (s, 3H), 3.51 (d,  $J = 9.5$  Hz, 1H), 3.38

(d,  $J = 9.5$  Hz, 1H), 3.11 (d,  $J = 15.5$  Hz, 1H), 2.69-2.56 (m, 3H), 2.20 (d,  $J = 10.5$  Hz, 6H), 1.26 (s, 3H), 1.19 (s, 3H);  $^{13}\text{C}$  NMR (125 MHz,  $\text{CDCl}_3$ )  $\delta$ : 177.8, 158.4, 137.6, 137.2, 137.0, 133.0, 129.7, 128.6, 128.3, 121.6, 117.7, 113.1, 112.0, 59.7, 55.3, 49.1, 41.4, 39.3, 38.2, 24.0, 21.0, 20.0, 19.2; HRMS  $m/z$  (ESI) calcd for  $\text{C}_{23}\text{H}_{28}\text{NO}_2$  ( $[\text{M}+\text{H}]^+$ ) 350.2115, found 350.2117.

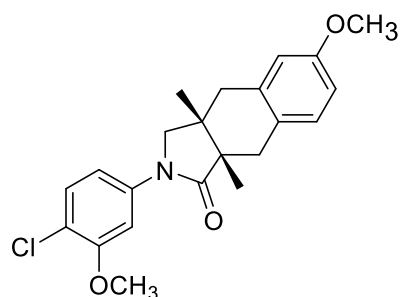

**2-(4-Chloro-3-methoxyphenyl)-6-methoxy-3a,9a-dimethyl-2,3,3a,4,9,9a-hexahydro-1H-benzo[f]isoindol-1-one (3j)**, white solid (0.0547 g, 71% yield, d.r. > 20:1);  $^1\text{H}$  NMR (500 MHz,  $\text{CDCl}_3$ )  $\delta$ :

7.88-7.85 (m, 2H), 7.68 (d,  $J = 2.5$  Hz, 1H), 7.31 (d,  $J = 8.5$  Hz, 1H), 7.02-6.99 (m, 2H), 3.93-3.92 (m, 1H), 3.88 (d,  $J = 2.5$  Hz, 6H), 3.85-3.75 (m, 1H), 3.66 (d,  $J = 10.0$  Hz, 1H), 3.60 (d,  $J = 15.0$  Hz, 1H), 3.39 (d,  $J = 9.5$  Hz, 1H), 3.27 (d,  $J = 15.0$  Hz, 1H), 1.47 (s, 3H), 1.34 (s, 3H);  $^{13}\text{C}$  NMR (125 MHz,  $\text{CDCl}_3$ )  $\delta$ : 175.8, 163.7, 155.1, 139.0, 133.2, 129.8 (2), 129.1, 118.2, 114.7, 114.5, 111.3, 104.5, 59.5, 59.2, 56.1, 55.7, 52.6, 38.7, 25.2, 21.5, 18.1; HRMS  $m/z$  (ESI) calcd for  $\text{C}_{22}\text{H}_{25}\text{ClNO}_3$  ( $[\text{M}+\text{H}]^+$ ) 386.1517, found 386.1511.

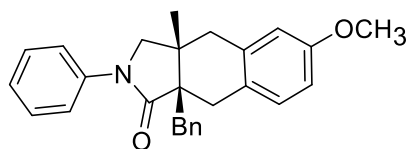

**9a-Benzyl-6-methoxy-3a-methyl-2-phenyl-2,3,3a,4,9,9a-hexahydro-1H-benzo[f]isoindol-1-one (3k)**,

colorless oil (0.0564 g, 71% yield, d.r. > 20:1);  $^1\text{H}$  NMR (500 MHz,  $\text{CDCl}_3$ )  $\delta$ : 7.77 (d,  $J = 9.5$  Hz, 2H), 7.66 (d,  $J = 10.0$  Hz, 2H), 7.38 (t,  $J = 9.0$  Hz, 2H), 7.21-7.10 (m, 5H), 6.97 (d,  $J = 9.5$  Hz, 2H), 4.29 (d,  $J = 13.0$  Hz, 1H), 3.92 (d,  $J = 13.5$  Hz, 1H), 3.87 (s, 3H), 3.40 (d,  $J = 21.0$  Hz, 1H), 3.24 (d,  $J = 17.5$  Hz, 1H), 3.11 (t,  $J = 10.0$  Hz,

3H), 2.99 (d,  $J = 18.0$  Hz, 1H), 1.51 (s, 3H);  $^{13}\text{C}$  NMR (125 MHz,  $\text{CDCl}_3$ )  $\delta$ : 175.7, 163.9, 140.9, 139.4, 139.3, 132.6, 129.7, 128.9, 127.1, 127.0, 124.6, 124.2, 123.9, 119.7, 114.6, 61.8, 61.0, 55.8, 41.6, 37.5, 35.5, 21.2; HRMS  $m/z$  (ESI) calcd for  $\text{C}_{27}\text{H}_{28}\text{NO}_2$  ( $[\text{M}+\text{H}]^+$ ) 398.2115, found 398.2119.

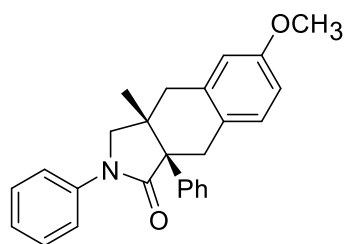

**6-Methoxy-3a-methyl-2,9a-diphenyl-2,3,3a,4,9,9a-hexahydro-1H-benzo[f]isoindol-1-one (3l)**, colorless oil (0.0475 g, 62% yield, d.r. > 20:1);  $^1\text{H}$  NMR (500 MHz,  $\text{CDCl}_3$ )  $\delta$ : 7.54-7.52 (m, 2H), 7.36 (t,  $J = 8.0$  Hz, 2H),

7.29 (t,  $J = 7.5$  Hz, 2H), 7.23 (d,  $J = 7.0$  Hz, 1H), 7.18-7.15 (m, 3H), 7.05 (d,  $J = 8.5$  Hz, 1H), 6.90 (d,  $J = 2.5$  Hz, 1H), 6.74-6.72 (m, 1H), 3.82 (s, 3H), 3.70 (d,  $J = 9.5$  Hz, 1H), 3.59 (d,  $J = 9.5$  Hz, 1H), 3.44-3.35 (m, 2H), 2.82 (d,  $J = 14.0$  Hz, 1H), 2.67 (d,  $J = 14.5$  Hz, 1H), 0.66 (s, 3H);  $^{13}\text{C}$  NMR (125 MHz,  $\text{CDCl}_3$ )  $\delta$ : 176.7, 158.7, 142.1, 139.0, 138.0, 128.9, 128.7, 128.4, 128.3, 127.4, 126.8, 125.0, 120.6, 113.4, 111.9, 59.8, 58.9, 55.4, 42.3, 40.8, 38.1, 25.5; HRMS  $m/z$  (ESI) calcd for  $\text{C}_{26}\text{H}_{26}\text{NO}_2$  ( $[\text{M}+\text{H}]^+$ ) 384.1985, found 384.1989.

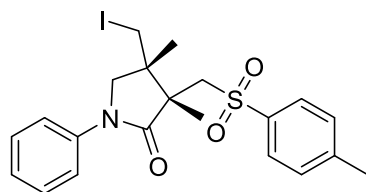

**4-(Iodomethyl)-3,4-dimethyl-1-phenyl-3-(tosylmethyl)pyrrolidin-2-one (4a)**, colorless oil (0.0805 g, 81% yield, d.r. > 20:1);  $^1\text{H}$  NMR (500 MHz,  $\text{CDCl}_3$ )  $\delta$ :

7.86-7.81 (m, 2H), 7.60-7.54 (m, 2H), 7.42-7.34 (m, 4H), 7.18 (t,  $J = 9.5$  Hz, 1H), 4.04-3.90 (m, 2H), 3.65-3.61 (m, 2H), 3.59-3.51 (m, 1H), 3.40-3.37 (m, 1H), 2.46 (s, 3H), 1.66 (s, 3H), 1.59 (s, 3H);  $^{13}\text{C}$  NMR (125 MHz,  $\text{CDCl}_3$ )  $\delta$ : 174.4, 145.0, 138.6,



138.2, 130.0, 129.0, 127.6, 125.3, 120.3, 59.2, 57.8, 51.5, 41.7, 21.7, 20.8, 20.2, 16.1;

HRMS  $m/z$  (ESI) calcd for  $C_{21}H_{25}INO_3S$  ( $[M+H]^+$ ) 498.0594, found 498.0598.

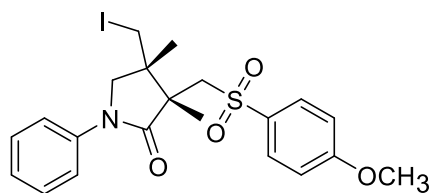

**4-(Iodomethyl)-3-(((4-methoxyphenyl)sulfonyl)methyl)-3,4-dimethyl-1-phenylpyrrolidin-2-one**

**(4b)**, colorless oil (0.0872 g, 85% yield, d.r. >

20:1);  $^1H$  NMR (500 MHz,  $CDCl_3$ )  $\delta$ : 7.89-7.84 (m, 2H), 7.54 (d,  $J = 8.5$  Hz, 2H), 7.38-7.33 (m, 2H), 7.18-7.14 (m, 1H), 7.01 (d,  $J = 8.5$  Hz, 2H), 3.92 (d,  $J = 10.5$  Hz, 2H), 3.88 (s, 3H), 3.70-3.60 (m, 2H), 3.58 (d,  $J = 10.0$  Hz, 1H), 3.39 (t,  $J = 7.5$  Hz, 1H), 1.64 (s, 3H), 1.58 (s, 3H);  $^{13}C$  NMR (125 MHz,  $CDCl_3$ )  $\delta$ : 174.4, 163.9, 138.6, 132.8, 129.8, 129.0, 125.2, 120.3, 114.6, 59.5, 57.8, 55.8, 51.5, 41.7, 20.9, 20.1, 16.1;

HRMS  $m/z$  (ESI) calcd for  $C_{21}H_{25}INO_4S$  ( $[M+H]^+$ ) 514.0543, found 514.0547.

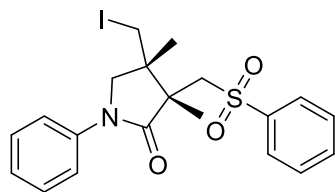

**4-(Iodomethyl)-3,4-dimethyl-1-phenyl-3-((phenylsulfonyl)methyl)pyrrolidin-2-one (4c)**, colorless oil (0.0773 g, 80% yield, d.r. > 20:1);  $^1H$  NMR (500 MHz,  $CDCl_3$ )  $\delta$ :

7.96-7.90 (m, 2H), 7.68-7.65 (m, 1H), 7.60-7.56 (m, 2H), 7.56-7.54 (m, 2H), 7.39-7.35 (m, 2H), 7.19-7.16 (m, 1H), 3.94-3.90 (m, 2H), 3.66-3.63 (m, 2H), 3.58 (d,  $J = 10.0$  Hz, 1H), 3.41 (d,  $J = 15.5$  Hz, 1H), 1.66 (s, 3H), 1.59 (s, 3H);  $^{13}C$  NMR (125 MHz,  $CDCl_3$ )  $\delta$ : 174.3, 141.0, 138.6, 134.0, 129.5, 129.0, 127.6, 125.3, 120.3, 59.2, 57.8, 51.6, 41.7, 20.8, 20.2, 16.0; HRMS  $m/z$  (ESI) calcd for  $C_{20}H_{23}INO_3S$  ( $[M+H]^+$ ) 484.0438, found 484.0434.

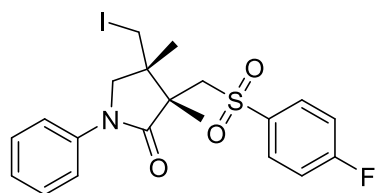

**3-(((4-Fluorophenyl)sulfonyl)methyl)-4-(iodomethyl)-3,4-dimethyl-1-phenylpyrrolidin-2-one (4d)**,

colorless oil (0.0782 g, 78% yield, d.r. > 20:1);  $^1\text{H}$  NMR (500 MHz,  $\text{CDCl}_3$ )  $\delta$ : 7.98-7.95 (m, 2H), 7.55-7.53 (m, 2H), 7.39-7.36 (m, 2H), 7.27-7.24 (m, 2H), 7.20-7.17 (m, 1H), 3.92-3.89 (m, 2H), 3.65-3.62 (m, 2H), 3.58 (d,  $J = 10.5$  Hz, 1H), 3.41 (d,  $J = 15.0$  Hz, 1H), 1.66 (s, 3H), 1.58 (s, 3H);  $^{13}\text{C}$  NMR (125 MHz,  $\text{CDCl}_3$ )  $\delta$ : 174.2, 165.9 (d,  $J_{\text{C-F}} = 255.5$  Hz), 138.5, 137.1, 130.5 (d,  $J_{\text{C-F}} = 9.5$  Hz), 129.1, 125.3, 120.3, 116.8 (d,  $J_{\text{C-F}} = 22.5$  Hz), 59.4, 57.8, 51.6, 41.7, 20.8, 20.2, 15.8;  $^{19}\text{F}$  NMR (471 MHz,  $\text{CDCl}_3$ )  $\delta$ : -102.8; HRMS  $m/z$  (ESI) calcd for  $\text{C}_{20}\text{H}_{22}\text{FINO}_3\text{S}$  ( $[\text{M}+\text{H}]^+$ ) 502.0344, found 502.0340.

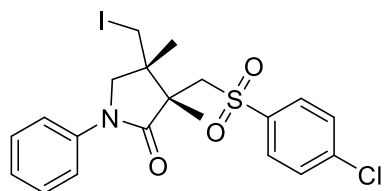

**3-(((4-Chlorophenyl)sulfonyl)methyl)-4-(iodomethyl)-3,4-dimethyl-1-phenylpyrrolidin-2-one (4e),**

colorless oil (0.0796 g, 77% yield, d.r. > 20:1);  $^1\text{H}$  NMR (500 MHz,  $\text{CDCl}_3$ )  $\delta$ : 7.92-7.87 (m, 2H), 7.59-7.51 (m, 4H), 7.38 (t,  $J = 8.0$  Hz, 2H), 7.19 (t,  $J = 7.5$  Hz, 1H), 3.97-3.87 (m, 2H), 3.65-3.62 (m, 2H), 3.57 (d,  $J = 10.5$  Hz, 1H), 3.40 (d,  $J = 15.0$  Hz, 1H), 1.65 (s, 3H), 1.58 (s, 3H);  $^{13}\text{C}$  NMR (125 MHz,  $\text{CDCl}_3$ )  $\delta$ : 174.1, 140.8, 139.4, 138.5, 129.8, 129.1 (2), 125.4, 120.3, 59.3, 57.8, 51.6, 41.7, 20.9, 20.2, 15.7; HRMS  $m/z$  (ESI) calcd for  $\text{C}_{20}\text{H}_{22}\text{ClINO}_3\text{S}$  ( $[\text{M}+\text{H}]^+$ ) 518.0048, found 518.0054.

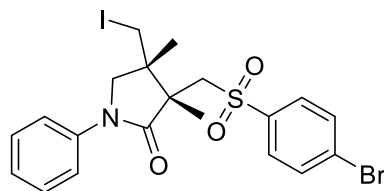

**3-(((4-Bromophenyl)sulfonyl)methyl)-4-(iodomethyl)-3,4-dimethyl-1-phenylpyrrolidin-2-one (4f),**

colorless oil (0.0853 g, 76% yield, d.r. > 20:1);  $^1\text{H}$  NMR (500 MHz,  $\text{CDCl}_3$ )  $\delta$ : 7.84-7.78 (m, 2H), 7.73-7.69 (m, 2H), 7.53 (t,  $J = 4.0$  Hz, 2H), 7.40-7.36 (m, 2H), 7.19 (t,  $J = 7.5$  Hz, 1H), 3.92-3.87 (m, 2H), 3.67-3.61 (m,

2H), 3.57 (d,  $J = 10.0$  Hz, 1H), 3.40 (d,  $J = 15.0$  Hz, 1H), 1.65 (s, 3H), 1.58 (s, 3H);  $^{13}\text{C}$  NMR (125 MHz,  $\text{CDCl}_3$ )  $\delta$ : 174.1, 139.9, 138.5, 132.8, 129.4, 129.2, 129.1, 125.4, 120.3, 59.2, 57.8, 51.6, 41.7, 20.9, 20.2, 15.7; HRMS  $m/z$  (ESI) calcd for  $\text{C}_{20}\text{H}_{22}\text{BrINO}_3\text{S}$  ( $[\text{M}+\text{H}]^+$ ) 561.9543, found 561.9547.

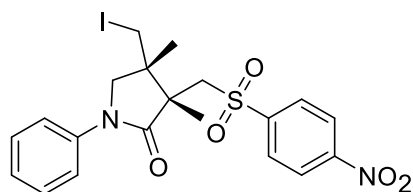

**4-(Iodomethyl)-3,4-dimethyl-3-(((4-nitrophenyl)sulfonyl)methyl)-1-phenylpyrrolidin-2-one (4g)**, colorless oil (0.0718 g, 68% yield, d.r. > 20:1);  $^1\text{H}$

NMR (500 MHz,  $\text{CDCl}_3$ )  $\delta$ : 8.37-8.35 (m, 2H), 8.08-8.05 (m, 2H), 7.47-7.44 (m, 2H), 7.41-7.38 (m, 1H), 7.31 (d,  $J = 7.5$  Hz, 2H), 4.78 (d,  $J = 52.0$  Hz, 2H), 4.31-4.22 (m, 2H), 4.03-3.99 (m, 1H), 2.98-2.95 (m, 1H), 1.78 (s, 3H), 1.12 (d,  $J = 7.0$  Hz, 3H);  $^{13}\text{C}$  NMR (125 MHz,  $\text{CDCl}_3$ )  $\delta$ : 172.9, 150.8, 145.6, 141.6, 140.3, 129.7, 129.3, 128.4, 124.4, 59.5, 56.7, 55.8, 41.3, 32.0, 20.3, 18.7; HRMS  $m/z$  (ESI) calcd for  $\text{C}_{20}\text{H}_{22}\text{IN}_2\text{O}_5\text{S}$  ( $[\text{M}+\text{H}]^+$ ) 529.0289, found 529.0293.

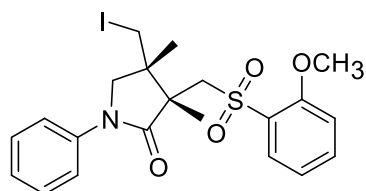

**4-(Iodomethyl)-3-(((2-methoxyphenyl)sulfonyl)methyl)-3,4-dimethyl-1-phenylpyrrolidin-2-one (4h)**, colorless oil (0.0862 g, 84% yield, d.r. > 20:1);  $^1\text{H}$

NMR (500 MHz,  $\text{CDCl}_3$ )  $\delta$ : 7.97-7.95 (m, 1H), 7.61-7.56 (m, 3H), 7.37 (t,  $J = 8.0$  Hz, 2H), 7.18 (t,  $J = 7.5$  Hz, 1H), 7.11 (t,  $J = 8.0$  Hz, 1H), 7.04 (d,  $J = 8.5$  Hz, 1H), 4.01 (s, 3H), 3.95 (d,  $J = 10.0$  Hz, 1H), 3.90 (t,  $J = 10.0$  Hz, 1H), 3.85 (d,  $J = 14.5$  Hz, 2H), 3.74-3.64 (m, 2H), 1.65 (s, 3H), 1.59 (s, 3H);  $^{13}\text{C}$  NMR (125 MHz,  $\text{CDCl}_3$ )  $\delta$ : 174.6, 157.2, 138.6, 135.8, 130.1, 129.0, 128.7, 125.2, 120.9, 120.3, 112.4, 57.9, 57.0, 56.6,

51.4, 41.6, 21.1, 20.3, 16.2; HRMS  $m/z$  (ESI) calcd for  $C_{21}H_{25}INO_4S$  ( $[M+H]^+$ ) 514.0543, found 514.0547.

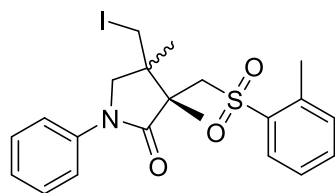

**4-(Iodomethyl)-3,4-dimethyl-1-phenyl-3-((*o*-tolylsulfonyl)methyl)pyrrolidin-2-one (4i)**, colorless oil (0.0805 g,

81% yield, d.r. = 1.5:1);  $^1H$  NMR (500 MHz,  $CDCl_3$ )  $\delta$ :

8.02 (d,  $J = 7.5$  Hz, 0.4H), 7.81 (d,  $J = 8.5$  Hz, 0.6H), 7.56-7.53 (m, 3H), 7.39-7.34 (m, 4H), 7.18 (t,  $J = 7.0$  Hz, 1H), 3.95-3.89 (m, 2H), 3.66-3.57(m, 3H), 3.45-3.37 (m, 1H), 2.75 (s, 1.8H), 2.45 (s, 1.2H), 1.66 (s, 1.8H), 1.65 (s, 1.2H), 1.59 (s, 1.8H), 1.59 (s, 1.2H);  $^{13}C$  NMR (125 MHz,  $CDCl_3$ )  $\delta$ : 174.4 (2), 145.0, 139.2, 138.6 (2), 137.8, 134.0, 133.0, 130.0, 129.5, 128.9, 127.6, 126.9, 125.3, 120.3, 59.3, 58.0, 57.8, 51.6, 51.5, 41.7 (2), 21.7, 20.8, 20.5, 20.3, 16.1, 16.0; HRMS  $m/z$  (ESI) calcd for  $C_{21}H_{25}INO_3S$  ( $[M+H]^+$ ) 498.0594, found 498.0590.

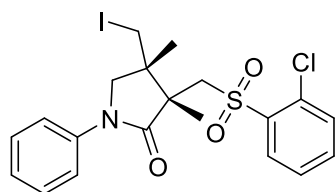

**3-(((2-Chlorophenyl)sulfonyl)methyl)-4-(iodomethyl)-3,4-dimethyl-1-phenylpyrrolidin-2-one (4j)**, colorless oil

(0.0786 g, 76% yield, d.r. > 20:1);  $^1H$  NMR (500 MHz,

$CDCl_3$ )  $\delta$ : 8.16-8.14 (m, 1H), 7.60-7.54 (m, 4H), 7.50-7.47 (m, 1H), 7.39-7.36 (m, 2H), 7.18 (t,  $J = 7.0$  Hz, 1H), 3.97-3.87 (m, 3H), 3.73 (d,  $J = 15.0$  Hz, 1H), 3.64 (t,  $J = 11.0$  Hz, 2H), 1.68 (s, 3H), 1.58 (s, 3H);  $^{13}C$  NMR (125 MHz,  $CDCl_3$ )  $\delta$ : 174.1, 138.5, 138.2, 135.0, 132.8, 132.1, 131.2, 129.0, 127.6, 125.2, 120.2, 57.8, 56.9, 51.5, 41.8, 20.9, 20.2, 15.8; HRMS  $m/z$  (ESI) calcd for  $C_{20}H_{22}ClINO_3S$  ( $[M+H]^+$ ) 518.0048, found 518.0054.

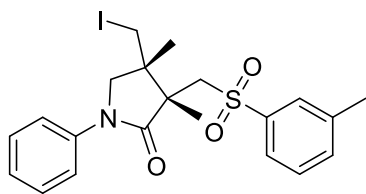

**4-(Iodomethyl)-3,4-dimethyl-1-phenyl-3-((*m*-tolylsulfonyl)methyl)pyrrolidin-2-one (4k)**, colorless oil

(0.0796 g, 80% yield, d.r. > 20:1);  $^1\text{H}$  NMR (500 MHz,  $\text{CDCl}_3$ )  $\delta$ : 7.74-7.70 (m, 2H), 7.56-7.53 (m, 2H), 7.47-7.45 (m, 2H), 7.37 (t,  $J = 8.0$  Hz, 2H), 7.17 (t,  $J = 7.0$  Hz, 1H), 3.97-3.90 (m, 2H), 3.62 (t,  $J = 7.5$  Hz, 2H), 3.58 (d,  $J = 10.0$  Hz, 1H), 3.39 (t,  $J = 7.5$  Hz, 1H), 2.45 (s, 3H), 1.67 (s, 3H), 1.59 (s, 3H);  $^{13}\text{C}$  NMR (125 MHz,  $\text{CDCl}_3$ )  $\delta$ : 174.4, 140.9, 139.8, 138.6, 134.7, 129.3, 129.0, 127.9, 125.3, 124.6, 120.3, 59.1, 57.8, 51.6, 41.8, 21.4, 20.8, 20.2, 16.2; HRMS  $m/z$  (ESI) calcd for  $\text{C}_{21}\text{H}_{25}\text{INO}_3\text{S}$  ( $[\text{M}+\text{H}]^+$ ) 498.0594, found 498.0590.

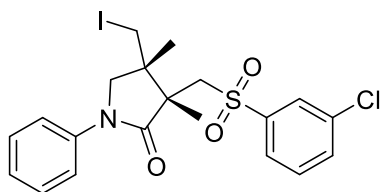

**3-(((3-Chlorophenyl)sulfonyl)methyl)-4-(iodomethyl)-3,4-dimethyl-1-phenylpyrrolidin-2-one (4l)**,

yellow oil (0.0775 g, 75% yield, d.r. > 20:1);  $^1\text{H}$  NMR (500 MHz,  $\text{CDCl}_3$ )  $\delta$ : 7.93 (t,  $J = 2.0$  Hz, 1H), 7.83 (d,  $J = 8.0$  Hz, 1H), 7.63 (d,  $J = 9.0$  Hz, 1H), 7.55-7.50 (m, 3H), 7.37 (t,  $J = 8.0$  Hz, 2H), 7.18 (t,  $J = 7.5$  Hz, 1H), 3.90 (t,  $J = 10.0$  Hz, 2H), 3.65 (t,  $J = 7.5$  Hz, 2H), 3.56 (d,  $J = 10.0$  Hz, 1H), 3.41 (d,  $J = 15.0$  Hz, 1H), 1.66 (s, 3H), 1.58 (s, 3H);  $^{13}\text{C}$  NMR (125 MHz,  $\text{CDCl}_3$ )  $\delta$ : 174.1, 142.6, 138.5, 135.8, 134.2, 130.8, 129.1, 127.7, 125.7, 125.3, 120.3, 59.2, 57.8, 51.6, 41.8, 20.8, 20.2, 15.8; HRMS  $m/z$  (ESI) calcd for  $\text{C}_{20}\text{H}_{22}\text{ClINO}_3\text{S}$  ( $[\text{M}+\text{H}]^+$ ) 518.0048, found 518.0052.

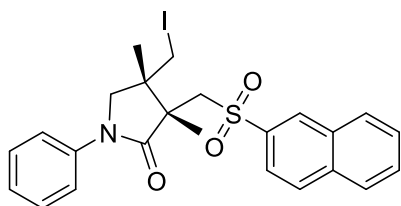

**4-(Iodomethyl)-3,4-dimethyl-3-((naphthalen-2-ylsulfonyl)methyl)-1-phenylpyrrolidin-2-one (4m)**,

colorless oil (0.0757 g, 71% yield, d.r. > 20:1);  $^1\text{H}$

NMR (500 MHz, CDCl<sub>3</sub>)  $\delta$ : 8.50 (d,  $J$  = 1.0 Hz, 1H), 8.00-7.97 (m, 2H), 7.92-7.87 (m, 2H), 7.66-7.62 (m, 2H), 7.54 (d,  $J$  = 8.0 Hz, 2H), 7.37-7.33 (m, 2H), 7.15 (t,  $J$  = 7.0 Hz, 1H), 3.98-3.91 (m, 2H), 3.73 (d,  $J$  = 15.0 Hz, 1H), 3.62 (t,  $J$  = 10.0 Hz, 2H), 3.48 (d,  $J$  = 15.0 Hz, 1H), 1.68 (s, 3H), 1.61 (s, 3H); <sup>13</sup>C NMR (125 MHz, CDCl<sub>3</sub>)  $\delta$ : 174.3, 138.6, 137.8, 135.4, 132.2, 129.9, 129.5 (2), 129.4, 129.0, 128.1, 127.9, 125.3, 122.2, 120.3, 59.2, 57.8, 51.6, 41.8, 20.9, 20.2, 16.2; HRMS  $m/z$  (ESI) calcd for C<sub>24</sub>H<sub>25</sub>INO<sub>3</sub>S ([M+H]<sup>+</sup>) 534.0594, found 534.0590.

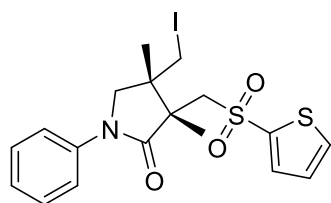

**4-(Iodomethyl)-3,4-dimethyl-1-phenyl-3-((thiophen-2-ylsulfonyl)methyl)pyrrolidin-2-one (4n)**, colorless oil (0.0665 g, 68% yield, d.r. > 20:1); <sup>1</sup>H NMR (500 MHz, CDCl<sub>3</sub>)  $\delta$ : 7.74-7.72 (m, 2H), 7.56-7.54 (m, 2H), 7.40-7.37 (m, 2H), 7.19-7.15 (m, 2H), 3.92-3.88 (m, 2H), 3.82 (d,  $J$  = 15.0 Hz, 1H), 3.65-3.63 (m, 1H), 3.58 (t,  $J$  = 12.0 Hz, 2H), 1.66 (s, 3H), 1.56 (s, 3H); <sup>13</sup>C NMR (125 MHz, CDCl<sub>3</sub>)  $\delta$ : 174.2, 142.3, 138.5, 134.1, 133.9, 129.1, 128.0, 125.3, 120.3, 60.9, 57.8, 51.6, 41.8, 20.7, 20.1, 15.9; HRMS  $m/z$  (ESI) calcd for C<sub>18</sub>H<sub>21</sub>INO<sub>3</sub>S<sub>2</sub> ([M+H]<sup>+</sup>) 490.0002, found 490.0008.

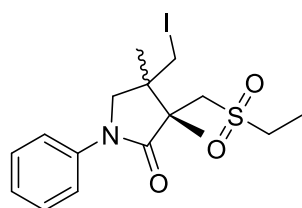

**3-((Ethylsulfonyl)methyl)-4-(iodomethyl)-3,4-dimethyl-1-phenylpyrrolidin-2-one (4o)**, colorless oil (0.0548 g, 63% yield, d.r.= 1:1); <sup>1</sup>H NMR (500 MHz, CDCl<sub>3</sub>)  $\delta$ : 7.59-7.57 (m, 2H), 7.41-7.36 (m, 2H), 7.21-7.16 (m, 1H), 3.89 (d,  $J$  = 10.5 Hz, 0.5H), 3.80-3.78 (m, 0.5Hz), 3.69 (d,  $J$  = 10.0 Hz, 0.5H), 3.64-3.62 (m, 0.5H), 3.56-3.52 (m, 1H), 3.39 (d,  $J$  = 10.0 Hz, 0.5H), 3.33 (d,  $J$  = 15.0 Hz, 0.5H), 3.13-3.05 (m, 2H), 1.62 (t,  $J$  = 8.0 Hz, 2H), 1.51 (s, 3H), 1.45-1.42 (m, 3H), 1.38 (s, 1.5H), 1.29 (s, 1.5H); <sup>13</sup>C NMR

(125 MHz, CDCl<sub>3</sub>)  $\delta$ : 175.6, 174.5, 139.2, 138.5, 129.1, 129.0, 125.4, 125.0, 120.4, 119.9, 59.3, 57.8, 54.3, 54.1, 51.9, 50.9, 50.5 (2), 41.6, 38.9, 25.1, 21.2, 20.8, 20.1, 17.9, 15.7, 6.9, 6.8; HRMS  $m/z$  (ESI) calcd for C<sub>16</sub>H<sub>23</sub>INO<sub>3</sub>S ([M+H]<sup>+</sup>) 436.0438, found 436.0442.

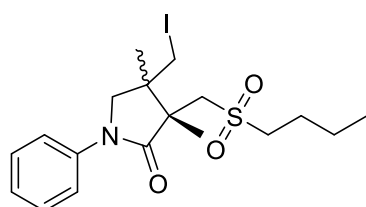

**3-((Butylsulfonyl)methyl)-4-(iodomethyl)-3,4-dimethyl-1-phenylpyrrolidin-2-one (4p)**, colorless oil (0.0574 g, 62% yield, d.r. = 1:1); <sup>1</sup>H NMR (500 MHz, CDCl<sub>3</sub>)  $\delta$ : 7.59-7.57 (m, 2H), 7.41-7.36 (m, 2H), 7.21-7.16 (m, 1H), 3.89 (d,  $J$  = 10.5 Hz, 0.5H), 3.79 (d,  $J$  = 10.0 Hz, 0.5H), 3.68 (d,  $J$  = 9.5 Hz, 0.5H), 3.62 (d,  $J$  = 10.5 Hz, 0.5H), 3.58-3.52 (m, 1.5H), 3.39 (d,  $J$  = 10.0 Hz, 1H), 3.33 (d,  $J$  = 14.5 Hz, 0.5H), 3.19 (d,  $J$  = 14.5 Hz, 0.5H), 3.09-3.05 (m, 1.5H), 3.04-3.01 (m, 1H), 1.88-1.83 (m, 2H), 1.50 (s, 3H), 1.48-1.41 (m, 2H), 1.38 (s, 1.5H), 1.29 (s, 1.5H), 0.99-0.95 (m, 3H); <sup>13</sup>C NMR (125 MHz, CDCl<sub>3</sub>)  $\delta$ : 175.7, 174.5, 139.2, 138.5, 129.1, 129.0, 125.3, 125.0, 120.3, 119.9, 59.2, 57.8, 55.9 (2), 54.9, 54.8, 52.0, 51.0, 41.6, 38.9, 25.1, 24.3, 24.2, 21.7 (2), 21.2, 20.8, 20.1, 17.9, 15.7, 13.6, 13.5; HRMS  $m/z$  (ESI) calcd for C<sub>18</sub>H<sub>27</sub>INO<sub>3</sub>S ([M+H]<sup>+</sup>) 464.0751, found 464.0754.

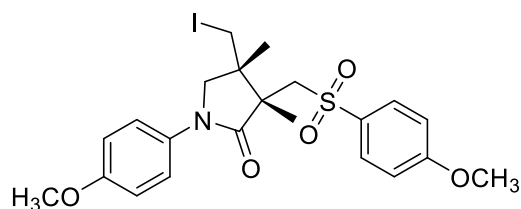

**4-(Iodomethyl)-1-(4-methoxyphenyl)-3-((4-methoxyphenyl)sulfonyl)methyl)-3,4-dimethylpyrrolidin-2-one (4q)**, colorless oil (0.0945 g, 87% yield, d.r. > 20:1); <sup>1</sup>H NMR (500 MHz, CDCl<sub>3</sub>)  $\delta$ : 7.87-7.84 (m, 2H), 7.45-7.42 (m, 2H), 7.02-7.00 (m, 2H), 6.90-6.88 (m, 2H), 3.92 (d,  $J$  = 9.5 Hz, 1H), 3.87 (s, 3H), 3.85 (d,  $J$  = 10.5 Hz, 1H), 3.78 (s, 3H), 3.62-3.59 (m, 2H), 3.58 (d,

$J = 2.5$  Hz, 1H), 3.38 (d,  $J = 15.0$  Hz, 1H), 1.63 (s, 3H), 1.56 (s, 3H);  $^{13}\text{C}$  NMR (125 MHz,  $\text{CDCl}_3$ )  $\delta$ : 174.0, 163.9, 157.1, 132.7, 131.7, 129.8, 122.1, 114.6, 114.2, 59.5, 58.2, 55.8, 55.5, 51.3, 41.8, 20.8, 20.1, 16.3; HRMS  $m/z$  (ESI) calcd for  $\text{C}_{22}\text{H}_{27}\text{INO}_5\text{S}$  ( $[\text{M}+\text{H}]^+$ ) 544.0649, found 544.0655.

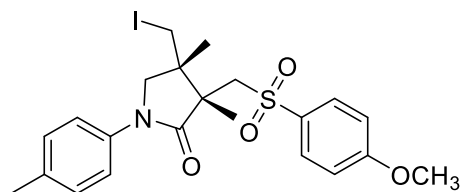

**4-(Iodomethyl)-3-(((4-methoxyphenyl)sulfonyl)methyl)-3,4-dimethyl-1-(*p*-tolyl)pyrrolidin-2-one (4r)**, colorless oil (0.0885 g, 84% yield,

d.r. > 20:1);  $^1\text{H}$  NMR (500 MHz,  $\text{CDCl}_3$ )  $\delta$ : 7.85 (d,  $J = 8.5$  Hz, 2H), 7.42 (d,  $J = 8.0$  Hz, 2H), 7.16 (d,  $J = 8.0$  Hz, 2H), 7.01 (d,  $J = 8.5$  Hz, 2H), 3.92 (d,  $J = 10.0$  Hz, 1H), 3.87 (s, 3H), 3.84 (d,  $J = 20.5$  Hz, 1H), 3.69-3.52 (m, 3H), 3.38 (d,  $J = 15.0$  Hz, 1H), 2.32 (s, 3H), 1.63 (s, 3H), 1.57 (s, 3H);  $^{13}\text{C}$  NMR (125 MHz,  $\text{CDCl}_3$ )  $\delta$ : 174.2, 163.9, 136.1, 135.0, 132.8, 129.8, 129.5, 120.4, 114.6, 59.5, 57.9, 55.8, 51.4, 41.8, 20.9, 20.8, 20.1, 16.3; HRMS  $m/z$  (ESI) calcd for  $\text{C}_{22}\text{H}_{27}\text{INO}_4\text{S}$  ( $[\text{M}+\text{H}]^+$ ) 528.0700, found 528.0704.

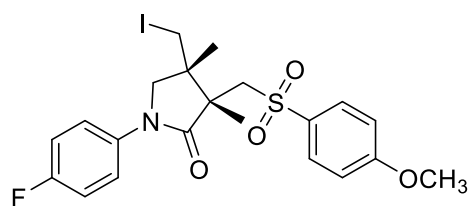

**1-(4-Fluorophenyl)-4-(iodomethyl)-3-(((4-methoxyphenyl)sulfonyl)methyl)-3,4-dimethylpyrrolidin-2-one (4s)**, yellow oil (0.0839 g,

79% yield, d.r. > 20:1);  $^1\text{H}$  NMR (500 MHz,  $\text{CDCl}_3$ )  $\delta$ : 7.87-7.84 (m, 2H), 7.52-7.49 (m, 2H), 7.07-7.01 (m, 4H), 3.91 (d,  $J = 7.5$  Hz, 1H), 3.88 (s, 3H), 3.86 (d,  $J = 10.5$  Hz, 1H), 3.62-3.59 (m, 3H), 3.39 (d,  $J = 15.0$  Hz, 1H), 1.63 (s, 3H), 1.57 (s, 3H);  $^{13}\text{C}$  NMR (125 MHz,  $\text{CDCl}_3$ )  $\delta$ : 174.3, 163.9, 159.9 (d,  $J_{\text{C-F}} = 243.6$  Hz), 134.7 (d,  $J_{\text{C-F}} = 2.9$  Hz), 132.6, 129.8, 122.1 (d,  $J_{\text{C-F}} = 7.9$  Hz), 115.7 (d,  $J_{\text{C-F}} = 22.4$  Hz), 114.6, 59.5,



58.1, 55.8, 51.4, 41.8, 21.0, 20.1, 15.9;  $^{19}\text{F}$  NMR (471 MHz,  $\text{CDCl}_3$ )  $\delta$ : -116.5;

HRMS  $m/z$  (ESI) calcd for  $\text{C}_{21}\text{H}_{24}\text{FINO}_4\text{S}$  ( $[\text{M}+\text{H}]^+$ ) 532.0449, found 532.0453.

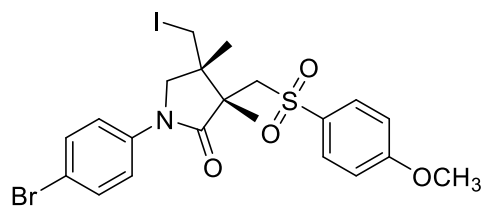

**1-(4-Bromophenyl)-4-(iodomethyl)-3-(((4-methoxyphenyl)sulfonyl)methyl)-3,4-dimethylpyrrolidin-2-one (4t)**, colorless oil (0.0886 g,

75% yield, d.r. > 20:1);  $^1\text{H}$  NMR (500 MHz,  $\text{CDCl}_3$ )  $\delta$ : 7.86-7.83 (m, 2H), 7.49-7.44 (m, 4H), 7.02-7.00 (m, 2H), 3.89 (d,  $J = 3.0$  Hz, 1H), 3.88 (s, 3H), 3.85 (d,  $J = 10.5$  Hz, 1H), 3.61-3.57 (m, 3H), 3.39 (d,  $J = 15.0$  Hz, 1H), 1.62 (s, 3H), 1.56 (s, 3H);  $^{13}\text{C}$  NMR (125 MHz,  $\text{CDCl}_3$ )  $\delta$ : 174.5, 163.9, 137.7, 132.6, 132.0, 129.8, 121.6, 118.1, 114.6, 59.4, 57.7, 55.8, 51.5, 41.6, 21.0, 20.2, 15.8; HRMS  $m/z$  (ESI) calcd for  $\text{C}_{21}\text{H}_{24}\text{BrINO}_4\text{S}$  ( $[\text{M}+\text{H}]^+$ ) 591.9649, found 591.9653.

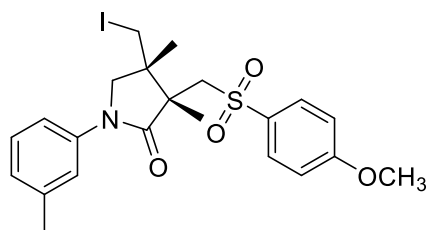

**4-(Iodomethyl)-3-(((4-methoxyphenyl)sulfonyl)methyl)-3,4-dimethyl-1-(*m*-tolyl)pyrrolidin-2-one (4u)**, colorless oil (0.0864 g, 82% yield, d.r. >

20:1);  $^1\text{H}$  NMR (500 MHz,  $\text{CDCl}_3$ )  $\delta$ : 7.87-7.83 (m, 2H), 7.37 (s, 1H), 7.33 (d,  $J = 8.0$  Hz, 1H), 7.24 (t,  $J = 8.0$  Hz, 1H), 7.01-6.97 (m, 3H), 3.92 (d,  $J = 10.0$  Hz, 1H), 3.88 (d,  $J = 2.5$  Hz, 1H), 3.86 (s, 3H), 3.63-3.56 (m, 3H), 3.39 (d,  $J = 15.0$  Hz, 1H), 2.35 (s, 3H), 1.63 (s, 3H), 1.56 (s, 3H);  $^{13}\text{C}$  NMR (125 MHz,  $\text{CDCl}_3$ )  $\delta$ : 174.4, 163.9, 138.9, 138.6, 132.8, 129.8, 128.8, 126.1, 121.0, 117.4, 114.6, 59.5, 57.9, 55.8, 51.5, 41.7, 21.6, 20.9, 20.1, 16.2; HRMS  $m/z$  (ESI) calcd for  $\text{C}_{22}\text{H}_{27}\text{INO}_4\text{S}$  ( $[\text{M}+\text{H}]^+$ ) 528.0700, found 528.0704.

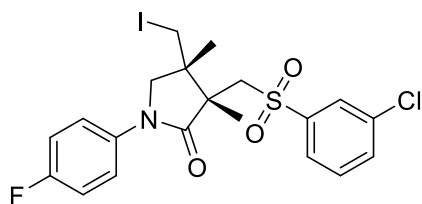

**3-(((3-Chlorophenyl)sulfonyl)methyl)-1-(4-fluorophenyl)-4-(iodomethyl)-3,4-dimethylpyrrolidin**

**-2-one (4v)**, yellow oil (0.0760 g, 71% yield, d.r. >

20:1);  $^1\text{H}$  NMR (500 MHz,  $\text{CDCl}_3$ )  $\delta$ : 7.93 (t,  $J = 2.0$  Hz, 1H), 7.84-7.82 (m, 1H), 7.65-7.63 (m, 1H), 7.54 (d,  $J = 8.0$  Hz, 1H), 7.52-7.49 (m, 2H), 7.08-7.05 (m, 2H), 3.87 (d,  $J = 10.5$  Hz, 2H), 3.64-3.57 (m, 3H), 3.41 (d,  $J = 15.0$  Hz, 1H), 1.66 (s, 3H), 1.58 (s, 3H);  $^{13}\text{C}$  NMR (125 MHz,  $\text{CDCl}_3$ )  $\delta$ : 174.0, 160.0 (d,  $J_{\text{C-F}} = 243.9$  Hz), 142.5, 135.8, 134.5 (d,  $J_{\text{C-F}} = 2.9$  Hz), 134.2, 130.8, 127.7, 125.7, 122.2 (d,  $J_{\text{C-F}} = 8.0$  Hz), 115.8 (d,  $J_{\text{C-F}} = 22.4$  Hz), 59.2, 58.1, 51.5, 41.8, 20.9, 20.2, 15.5;  $^{19}\text{F}$  NMR (471 MHz,  $\text{CDCl}_3$ )  $\delta$ : -116.3; HRMS  $m/z$  (ESI) calcd for  $\text{C}_{20}\text{H}_{21}\text{ClFINO}_3\text{S}$  ( $[\text{M}+\text{H}]^+$ ) 535.9954, found 535.9950.

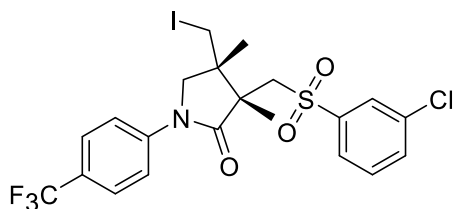

**3-(((3-Chlorophenyl)sulfonyl)methyl)-4-(iodomethyl)-3,4-dimethyl-1-(4-(trifluoromethyl)phenyl)pyrrolidin-2-one (4w)**, yellow oil

(0.0725 g, 62% yield, d.r. > 20:1);  $^1\text{H}$  NMR (500 MHz,  $\text{CDCl}_3$ )  $\delta$ : 7.94 (t,  $J = 2.0$  Hz, 1H), 7.85-7.83 (m, 1H), 7.71 (d,  $J = 8.5$  Hz, 2H), 7.66-7.63 (m, 3H), 7.54 (t,  $J = 8.0$  Hz, 1H), 3.94 (d,  $J = 10.5$  Hz, 1H), 3.86 (d,  $J = 10.0$  Hz, 1H), 3.67 (d,  $J = 10.5$  Hz, 1H), 3.63 (d,  $J = 15.0$  Hz, 1H), 3.58 (d,  $J = 10.0$  Hz, 1H), 3.42 (d,  $J = 15.0$  Hz, 1H), 1.67 (s, 3H), 1.60 (s, 3H);  $^{13}\text{C}$  NMR (125 MHz,  $\text{CDCl}_3$ )  $\delta$ : 174.6, 142.4, 141.4, 135.8, 134.3, 130.9, 127.7, 126.3 ( $q$ ,  $J_{\text{C-F}} = 2.7$  Hz), 125.7, 125.0, 122.9, 119.7, 59.1, 57.5, 51.7, 41.6, 21.0, 20.3, 15.2;  $^{19}\text{F}$  NMR (471 MHz,  $\text{CDCl}_3$ )  $\delta$ : -62.2; HRMS  $m/z$  (ESI) calcd for  $\text{C}_{21}\text{H}_{21}\text{ClF}_3\text{INO}_3\text{S}$  ( $[\text{M}+\text{H}]^+$ ) 585.9922, found 585.9926.

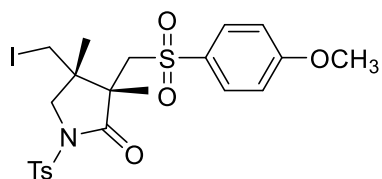

**4-(Iodomethyl)-3-(((4-methoxyphenyl)sulfonyl)methyl)-3,4-dimethyl-1-tosylpyrrolidin-2-one (4x),**

colorless oil (0.0733 g, 62% yield, d.r. > 20:1);  $^1\text{H}$  NMR (500 MHz,  $\text{CDCl}_3$ )  $\delta$ : 7.95 (d,  $J = 8.5$  Hz, 2H), 7.81-7.79 (m, 2H), 7.35 (d,  $J = 8.5$  Hz, 2H), 7.04-7.02 (m, 2H), 4.47 (d,  $J = 11.0$  Hz, 1H), 3.89 (s, 3H), 3.73 (d,  $J = 11.0$  Hz, 1H), 3.21-3.17 (m, 2H), 3.11 (d,  $J = 14.0$  Hz, 1H), 3.01 (d,  $J = 11.0$  Hz, 1H), 2.45 (s, 3H), 1.38 (s, 3H), 1.13 (s, 3H);  $^{13}\text{C}$  NMR (125 MHz,  $\text{CDCl}_3$ )  $\delta$ : 172.7, 164.1, 145.6, 134.6, 133.8, 132.4, 129.8, 128.3, 114.8, 59.1, 55.8, 53.9, 51.3, 42.5, 21.8, 21.0, 18.8, 6.5; HRMS  $m/z$  (ESI) calcd for  $\text{C}_{22}\text{H}_{27}\text{INO}_6\text{S}_2$  ( $[\text{M}+\text{H}]^+$ ) 592.0319, found 592.0323.

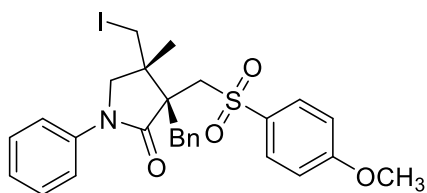

**3-Benzyl-4-(iodomethyl)-3-(((4-methoxyphenyl)sulfonyl)methyl)-4-methyl-1-phenylpyrrolidin-2-one (4y),** colorless oil (0.0931 g, 79% yield, d.r. >

20:1);  $^1\text{H}$  NMR (500 MHz,  $\text{CDCl}_3$ )  $\delta$ : 7.88 (d,  $J = 8.0$  Hz, 2H), 7.51-7.45 (m, 2H), 7.38 (t,  $J = 8.0$  Hz, 2H), 7.29 (s, 2H), 7.23 (t,  $J = 10.0$  Hz, 4H), 7.03 (d,  $J = 7.5$  Hz, 2H), 4.28 (t,  $J = 13.0$  Hz, 1H), 3.89 (s, 3H), 3.82-3.77 (m, 1H), 3.68 (t,  $J = 22.0$  Hz, 1H), 3.59-3.52 (m, 3H), 3.27-3.16 (m, 2H), 1.59 (s, 3H);  $^{13}\text{C}$  NMR (125 MHz,  $\text{CDCl}_3$ )  $\delta$ : 172.7, 164.0, 135.9, 132.7, 130.9, 130.6, 129.7, 129.1, 128.2, 127.3, 125.1, 120.0, 114.6, 57.4, 56.8, 56.3, 55.8, 43.2, 37.7, 19.2, 17.2; HRMS  $m/z$  (ESI) calcd for  $\text{C}_{27}\text{H}_{29}\text{INO}_4\text{S}$  ( $[\text{M}+\text{H}]^+$ ) 590.0856, found 590.0852.

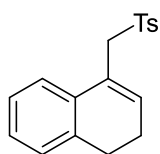

**4-(Tosylmethyl)-1,2-dihydronaphthalene (5a),<sup>[1]</sup>** (0.0423 g, 71% yield);  $^1\text{H}$  NMR (500 MHz,  $\text{CDCl}_3$ )  $\delta$ : 7.78 (d,  $J = 8.5$  Hz, 2H), 7.29 (t,

$J = 4.0$  Hz, 5H), 7.25-7.22 (m, 1H), 5.58-5.54 (m, 1H), 4.11 (t,  $J = 7.0$  Hz, 2H), 2.58-2.54 (m, 2H), 2.42 (s, 3H), 1.98 (s, 2H);  $^{13}\text{C}$  NMR (125 MHz,  $\text{CDCl}_3$ )  $\delta$ : 144.7, 143.1, 138.5, 133.2, 129.8, 128.2, 127.9, 127.0, 125.6, 121.3, 69.6, 28.5, 21.6, 16.0.

**(C) Reference**

[1] Chen, P.; Zhou, Q.; Chen, Z.; Liu, Y.; Liang, Y.; Tang, K.; Liu, Y. Silver-promoted oxidative sulfonylation and ring-expansion of vinylcyclopropanes with sodium sulfinates leading to dihydronaphthalene derivatives. *Org. Biomol. Chem.* **2020**, *18*, 7345-7354.

(D) Spectra

3a,6,9a-Trimethyl-2-phenyl-2,3,3a,4,9,9a-hexahydro-1H-benzof[*f*]isoindol-1-one  
(3a)

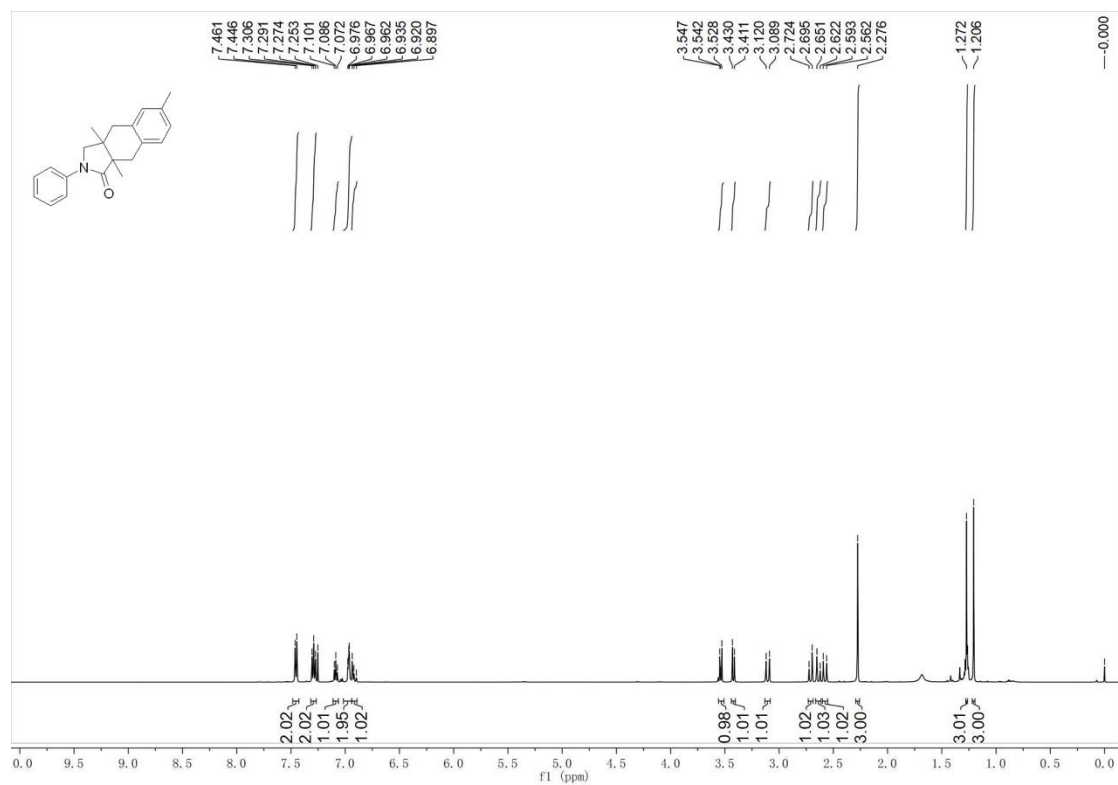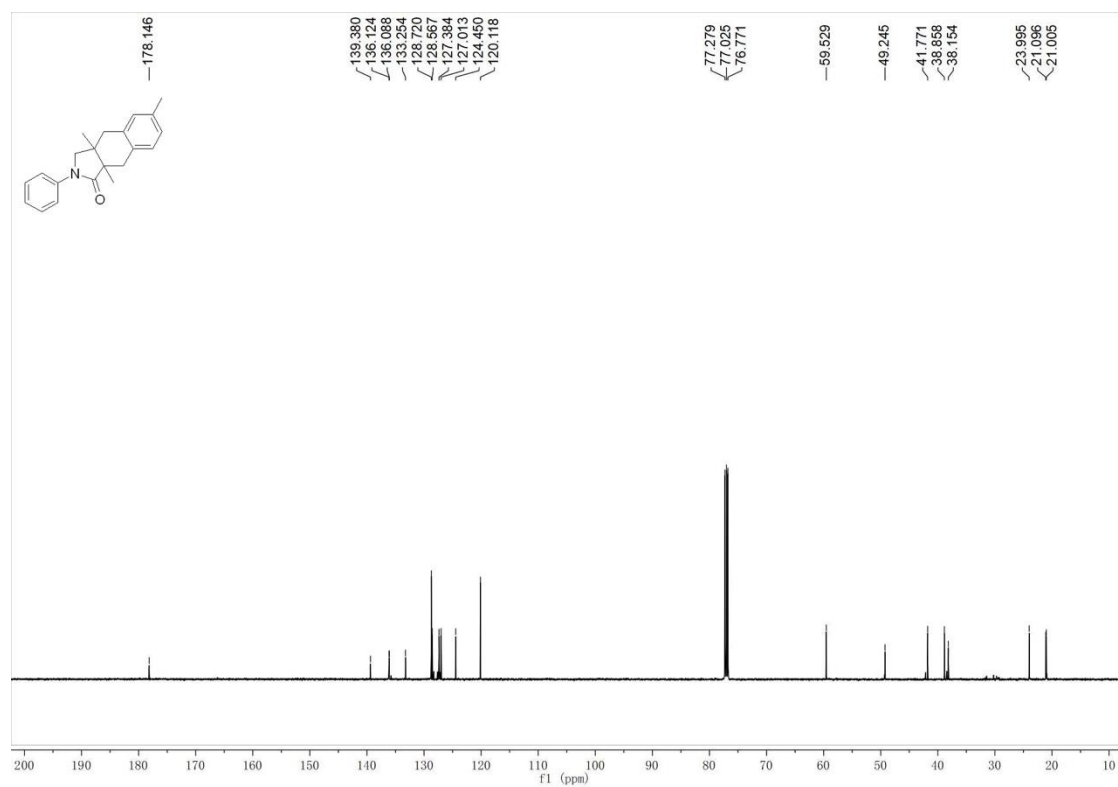

**6-Methoxy-3a,9a-dimethyl-2-phenyl-2,3,3a,4,9,9a-hexahydro-1H-benzo[f]isoindol-1-one (3b)**

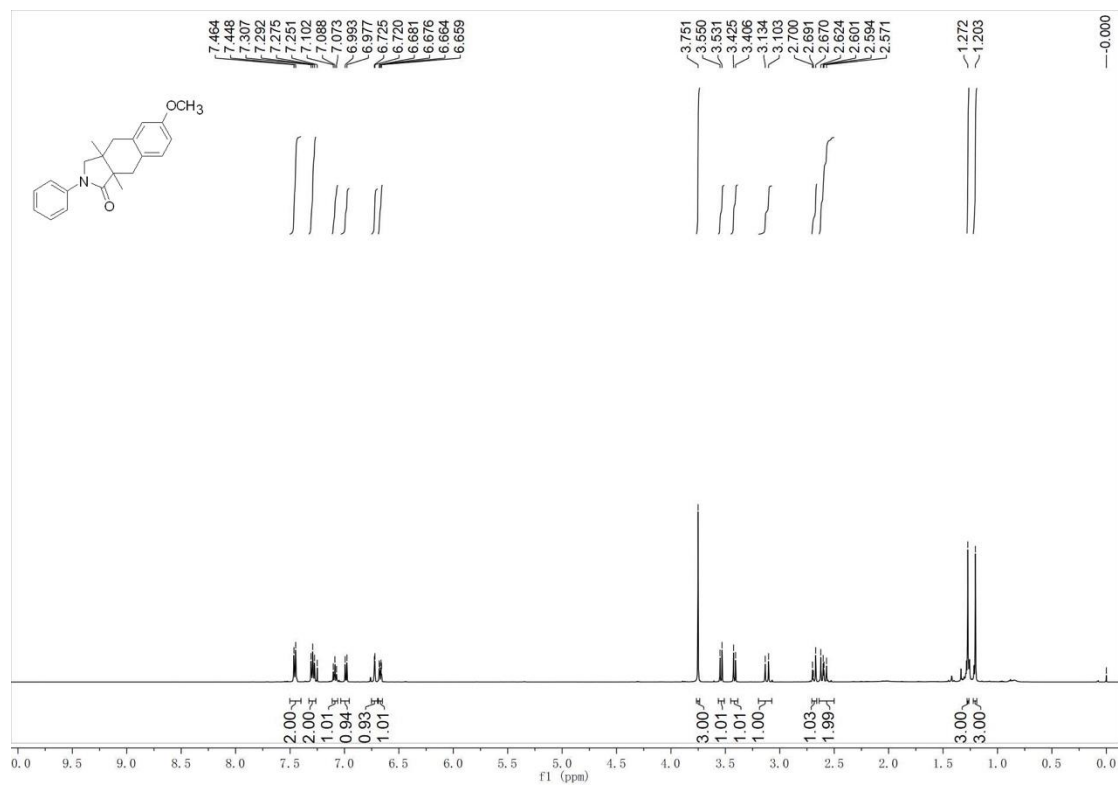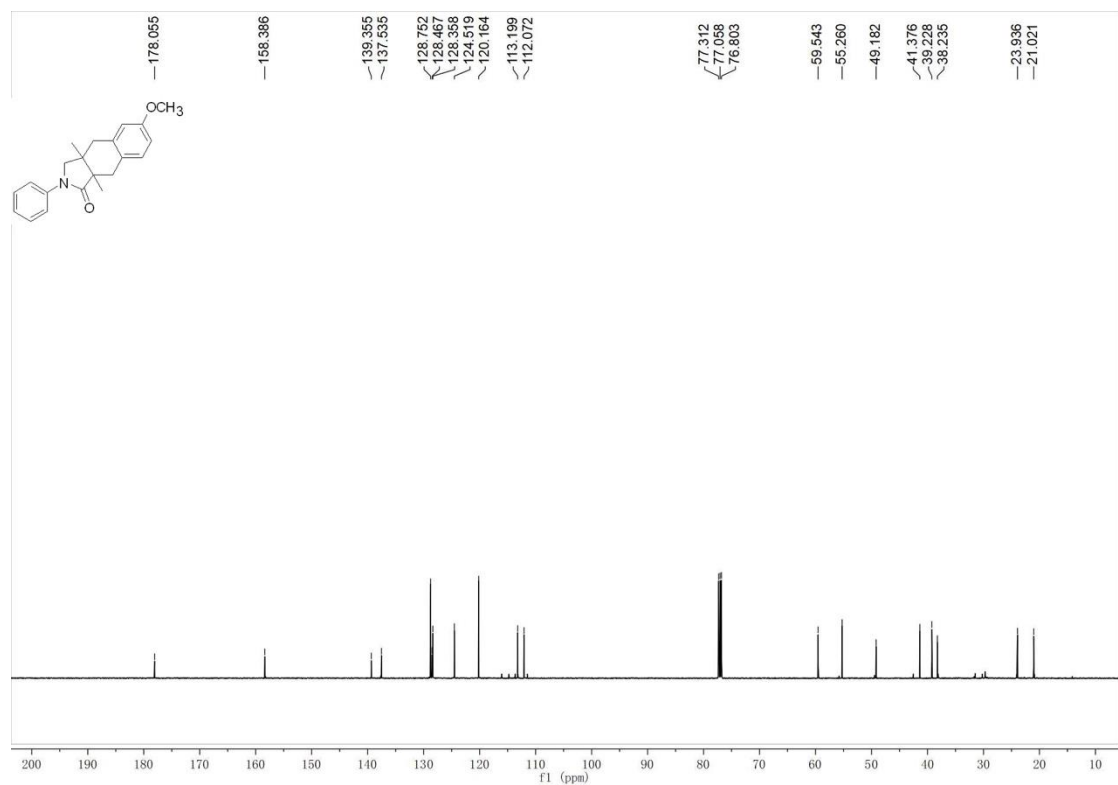

**6-Methoxy-3a,9a-dimethyl-2-(*p*-tolyl)-2,3,3a,4,9,9a-hexahydro-1*H*-benzo[*f*]isoindol-1-one (3c)**

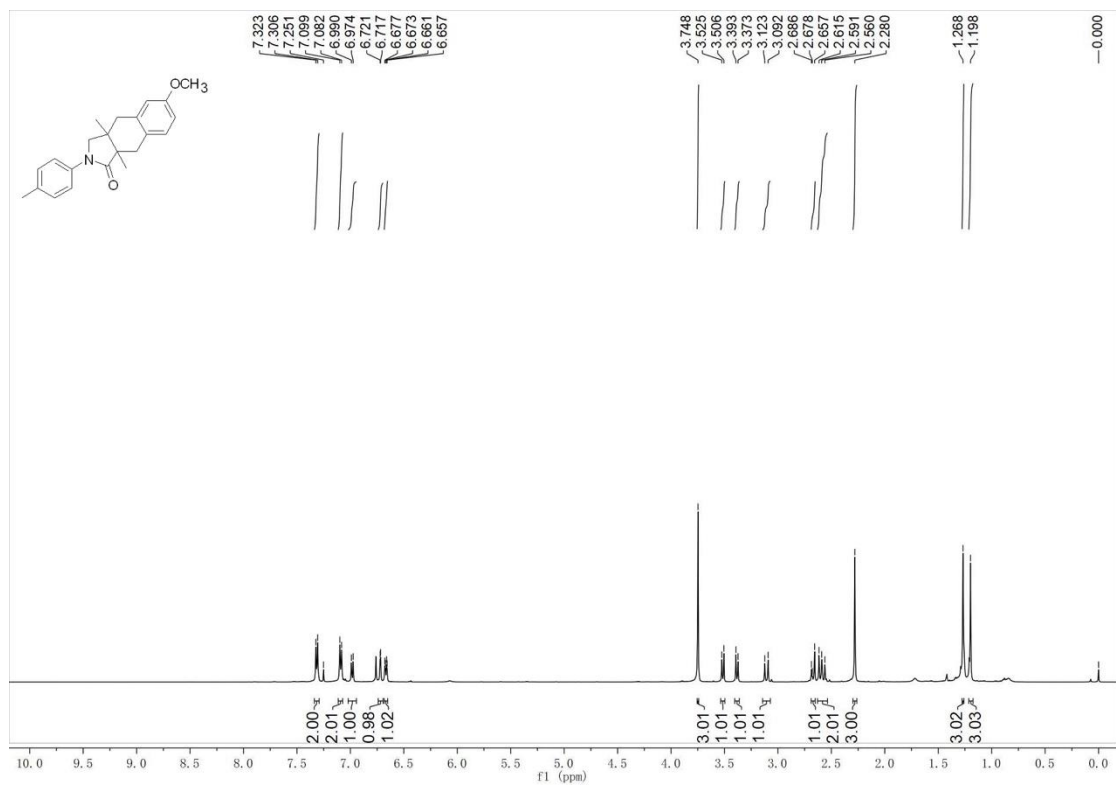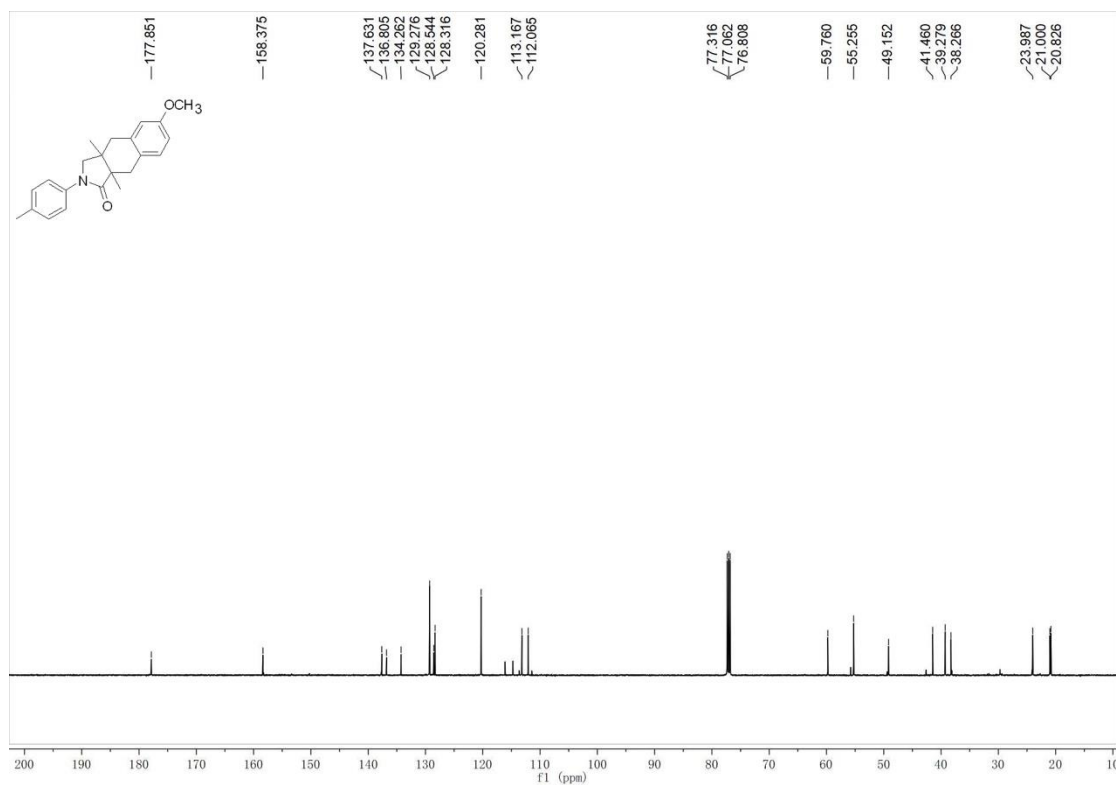

**2-(4-Butylphenyl)-6-methoxy-3a,9a-dimethyl-2,3,3a,4,9,9a-hexahydro-1H-benzo[*f*]isoindol-1-one (3d)**

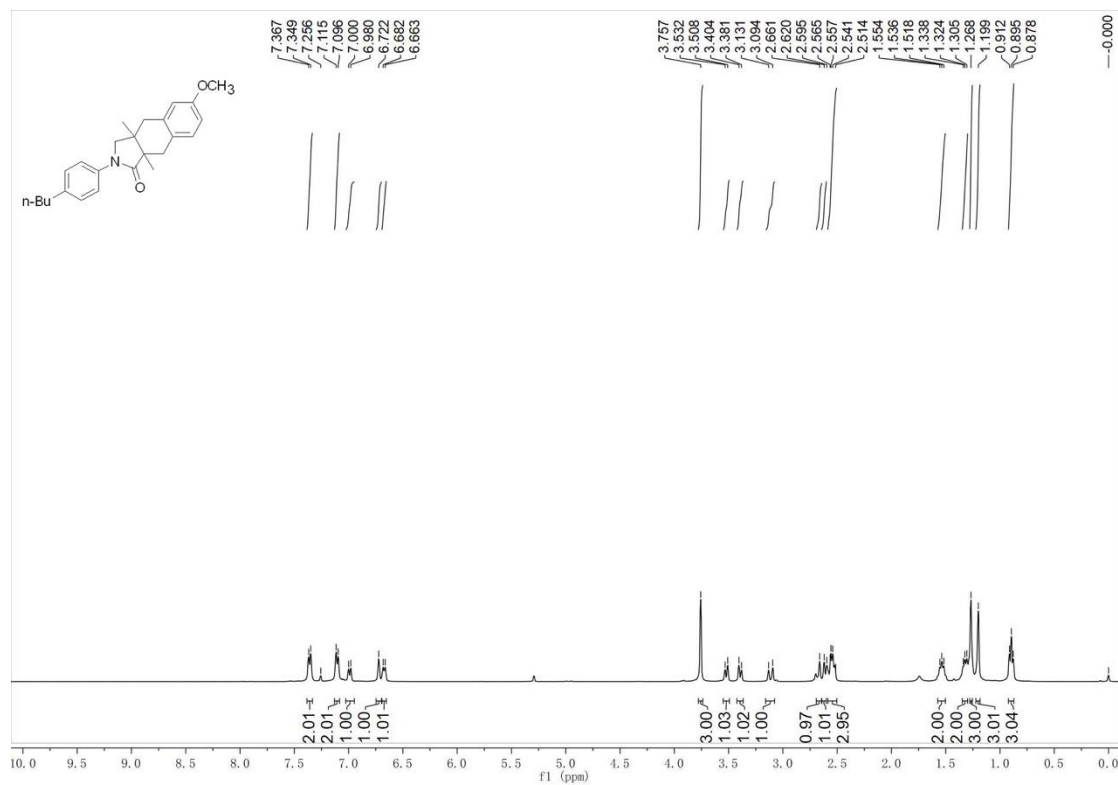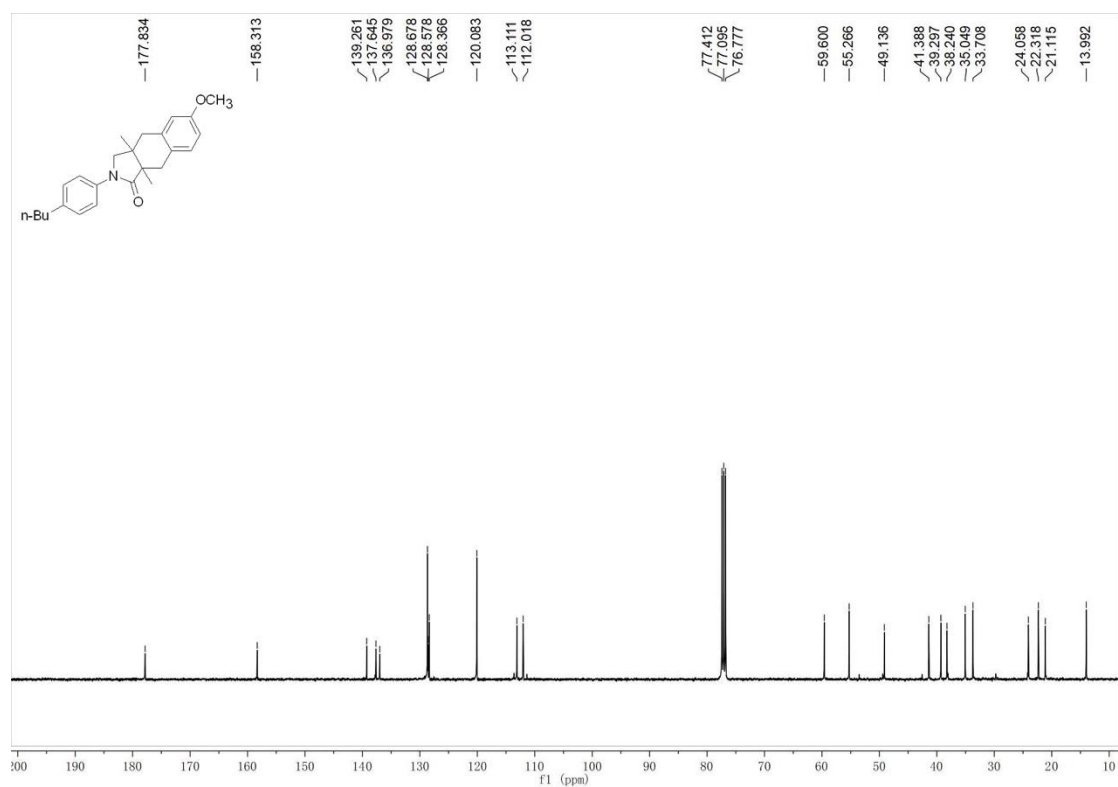



**2-(4-Fluorophenyl)-6-methoxy-3a,9a-dimethyl-2,3,3a,4,9,9a-hexahydro-1H-benzo [f]isoindol-1-one (3e)**

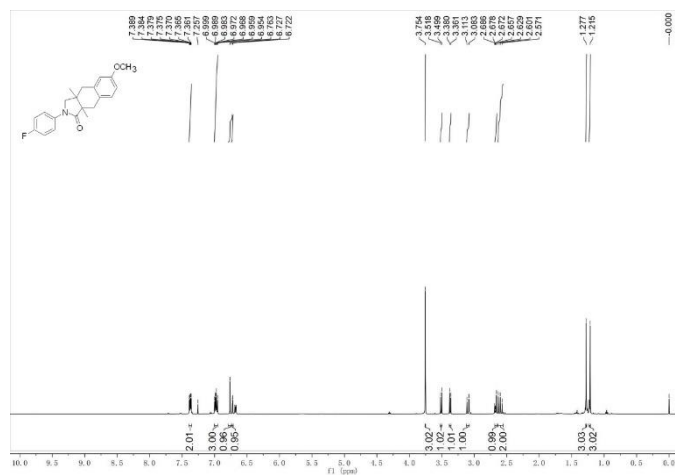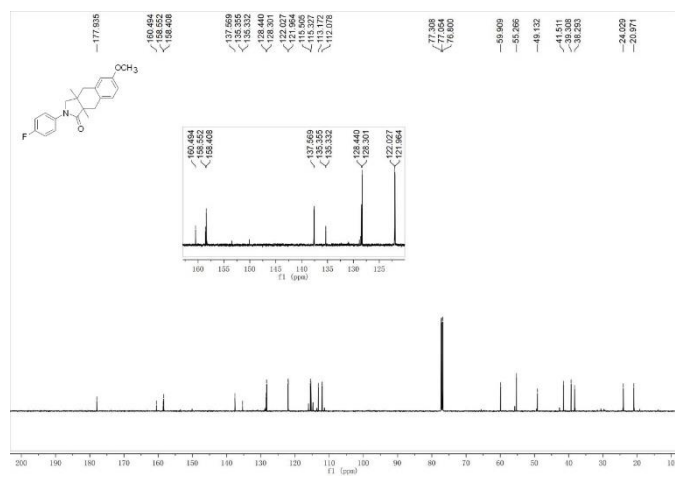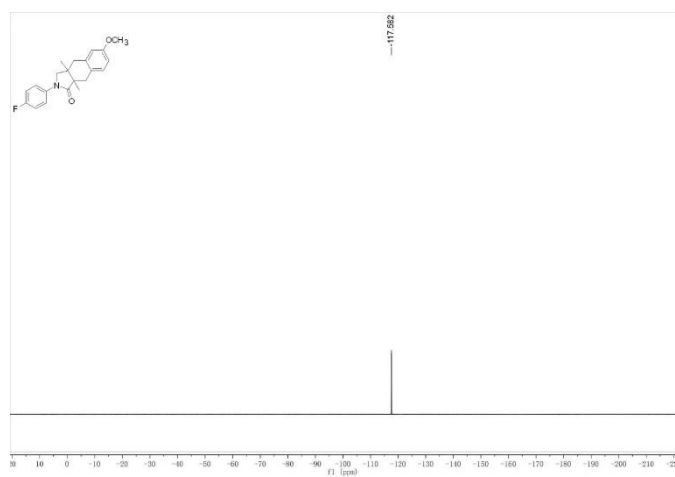

**2-(4-Chlorophenyl)-6-methoxy-3a,9a-dimethyl-2,3,3a,4,9,9a-hexahydro-1H-benzof[*f*]isoindol-1-one (3f)**

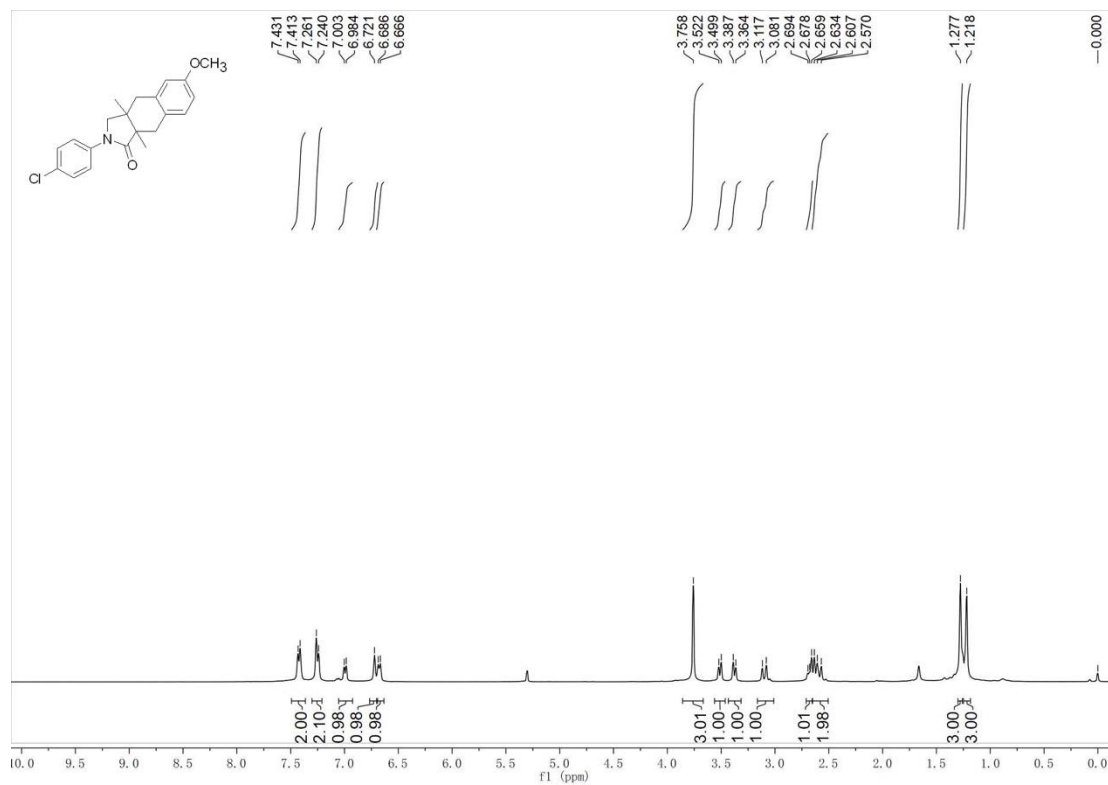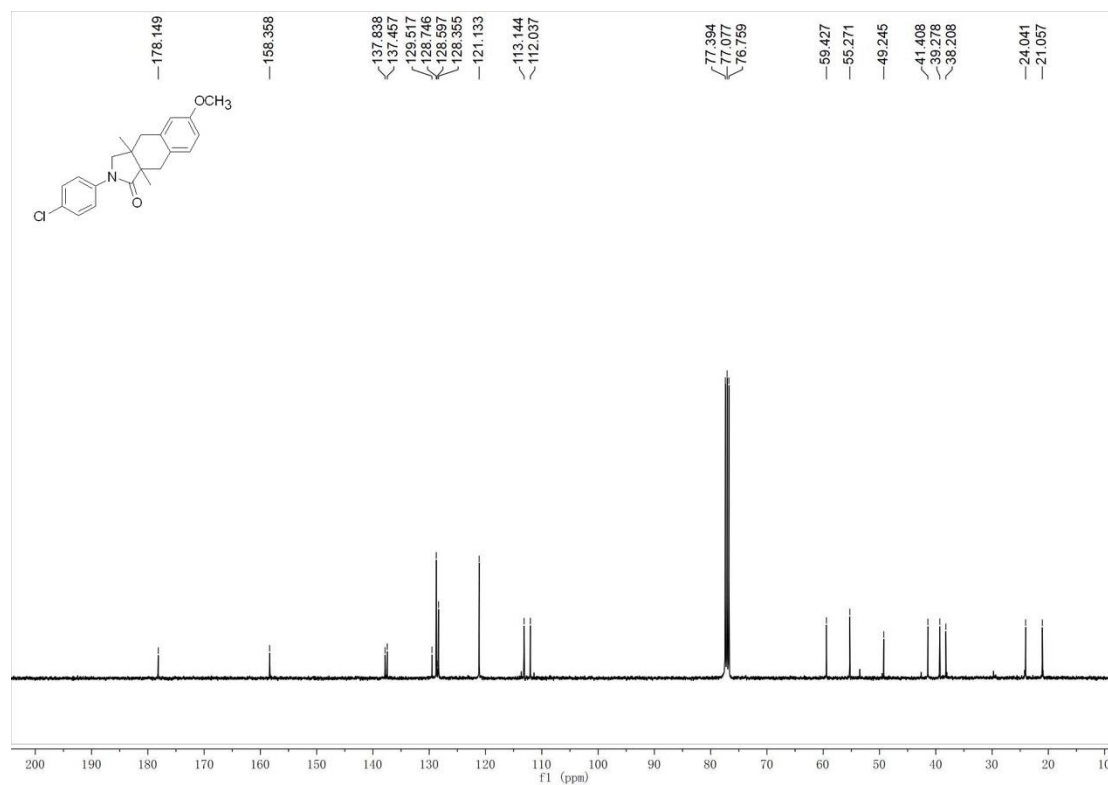

**6-Methoxy-3a,9a-dimethyl-2-(*m*-tolyl)-2,3,3a,4,9,9a-hexahydro-1*H*-benzo[*f*]isoindol-1-one (3g)**

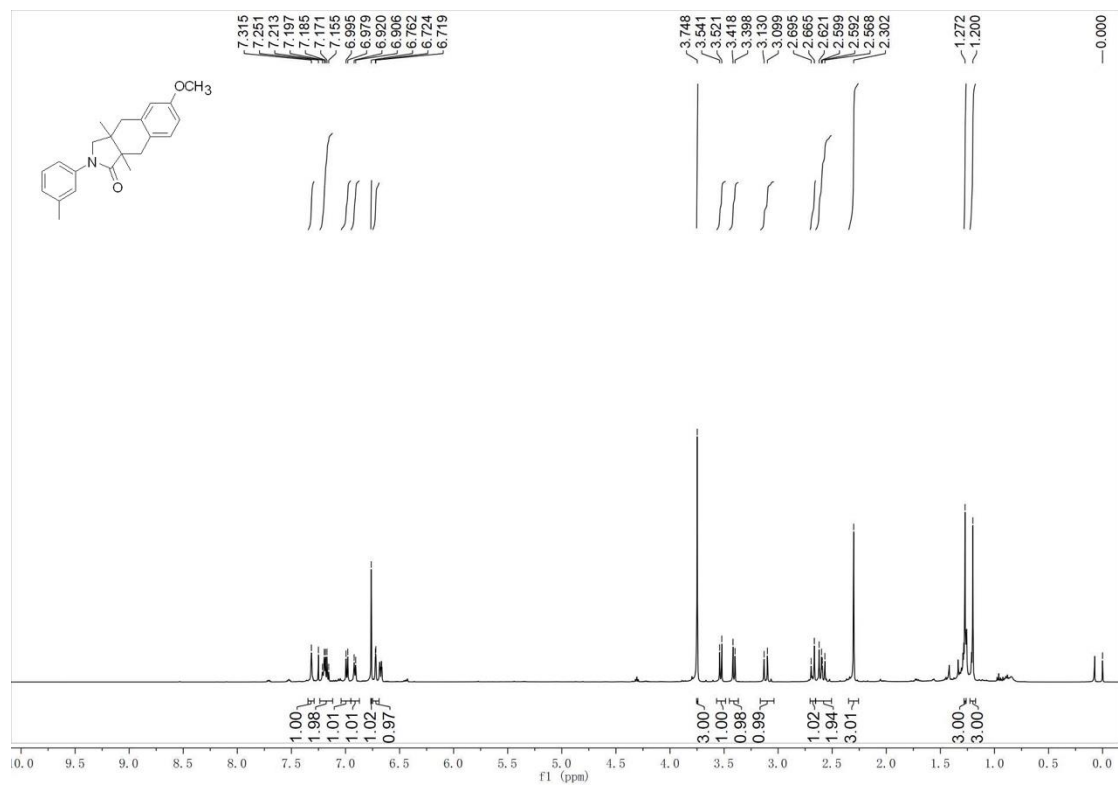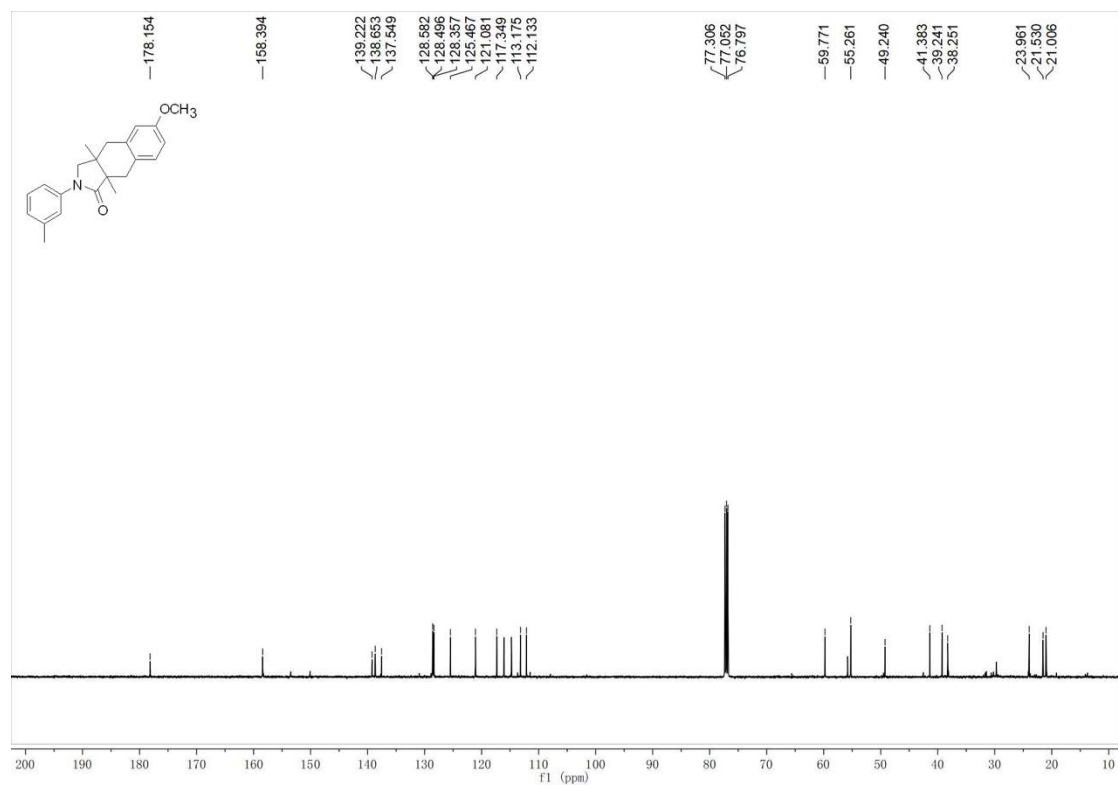

**2-(3-Fluorophenyl)-6-methoxy-3a,9a-dimethyl-2,3,3a,4,9,9a-hexahydro-1H-benzo[f]isoindol-1-one (3h)**

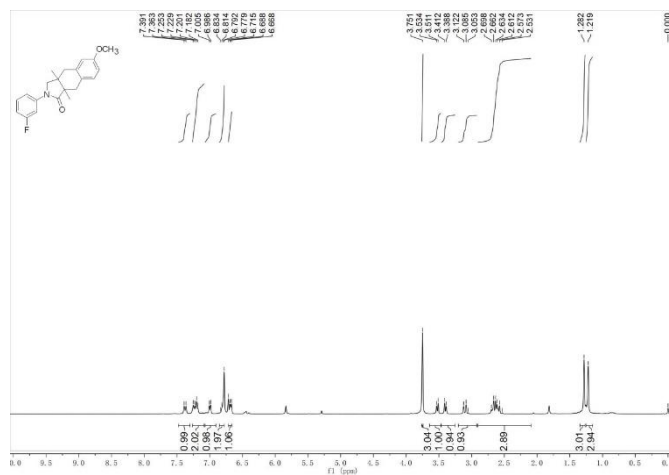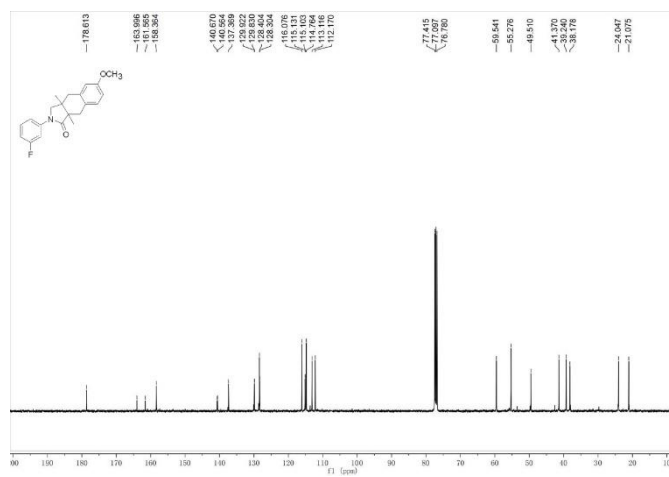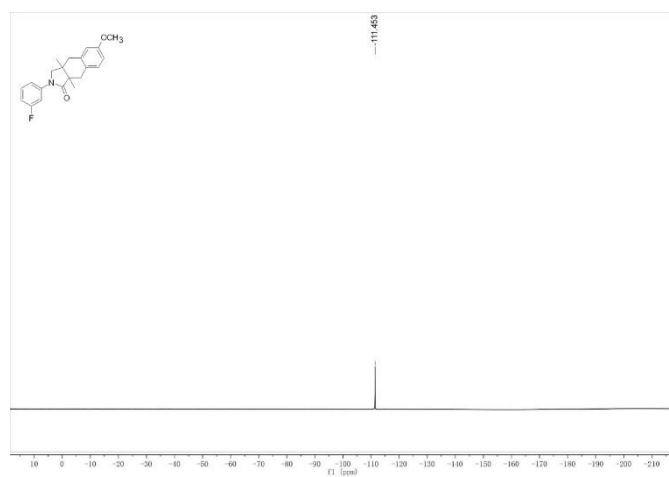

**2-(3,4-Dimethylphenyl)-6-methoxy-3a,9a-dimethyl-2,3,3a,4,9,9a-hexahydro-1H-benzo[*f*]isoindol-1-one (3i)**

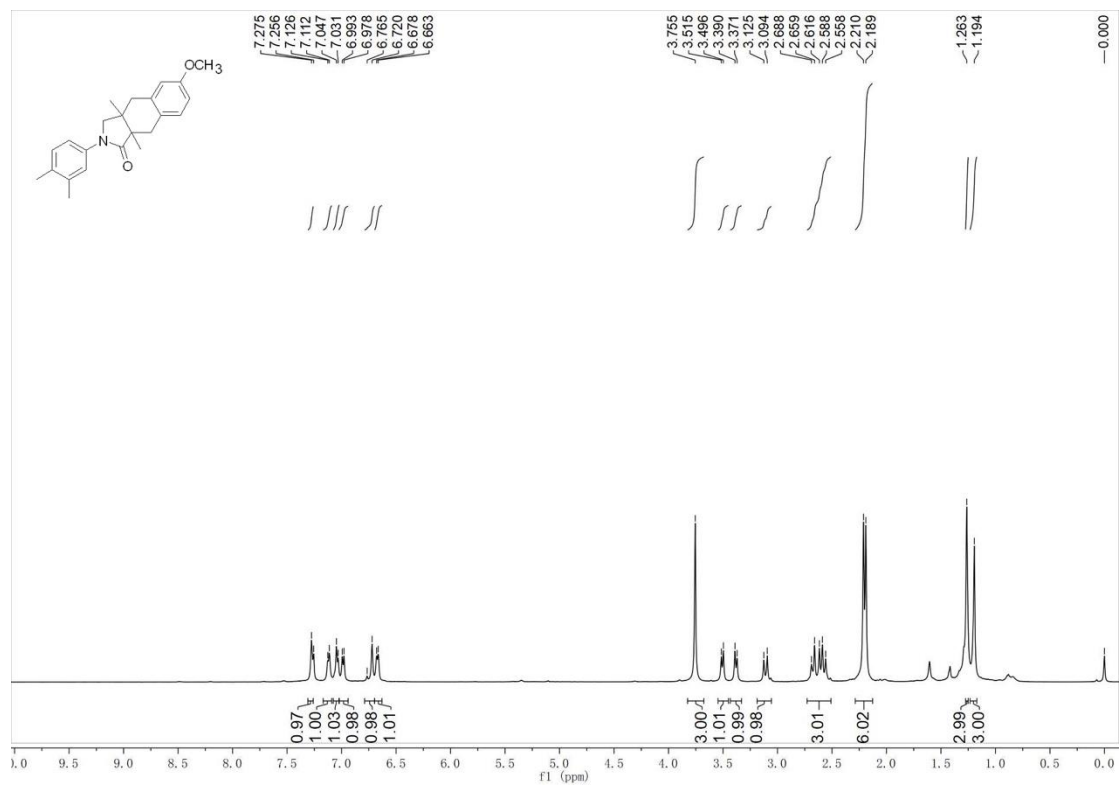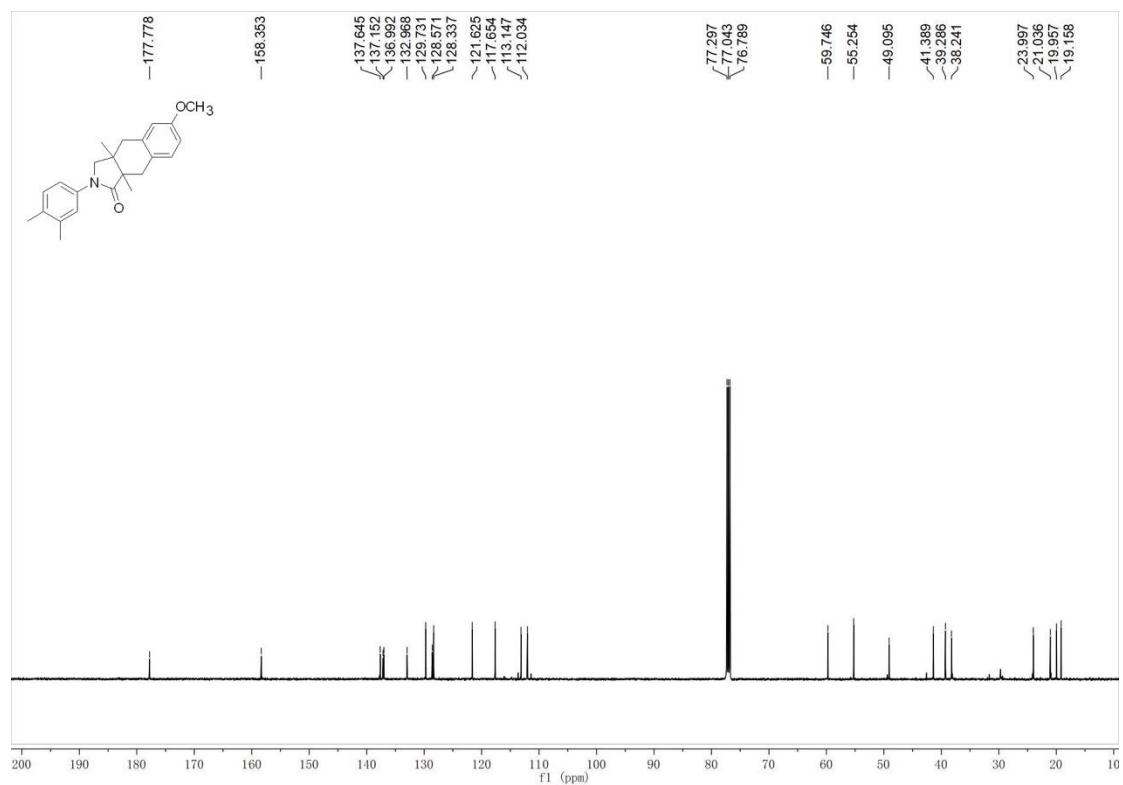

**2-(4-Chloro-3-methoxyphenyl)-6-methoxy-3a,9a-dimethyl-2,3,3a,4,9,9a-hexahydro-1H-benzo[f]isoindol-1-one (3j)**

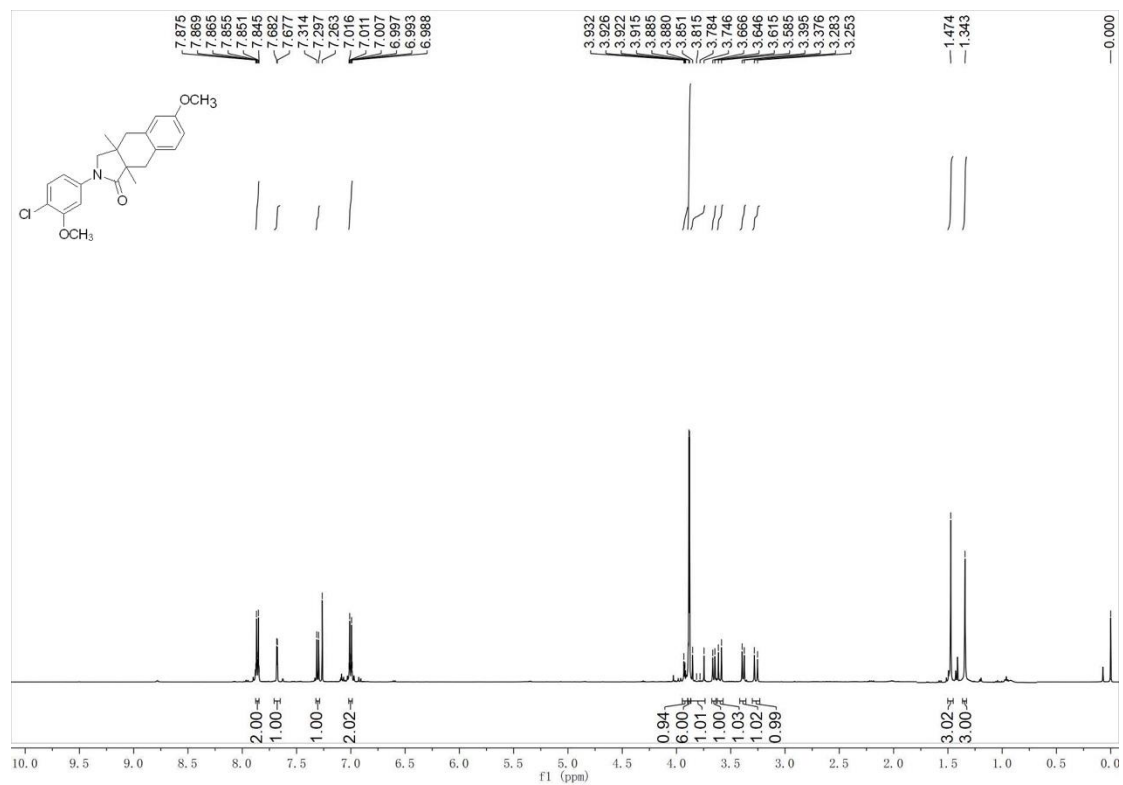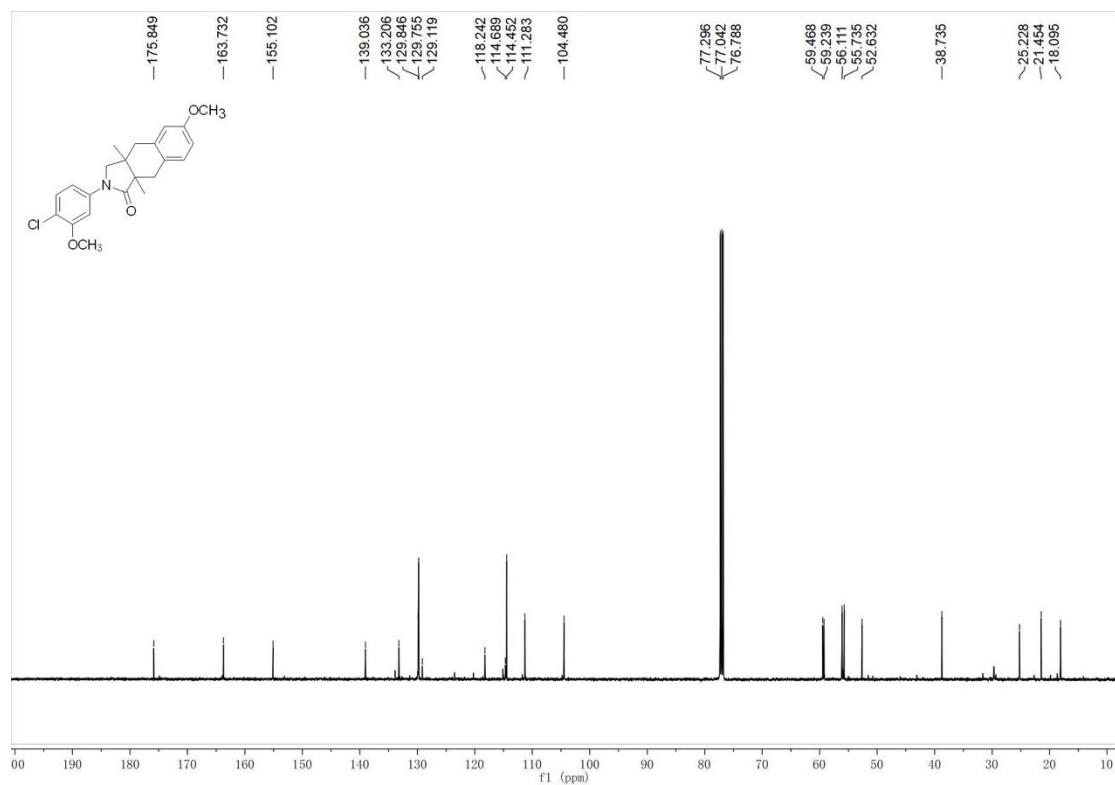

**9a-Benzyl-6-methoxy-3a-methyl-2-phenyl-2,3,3a,4,9,9a-hexahydro-1H-benzo[f]is  
 oindol-1-one (3k)**

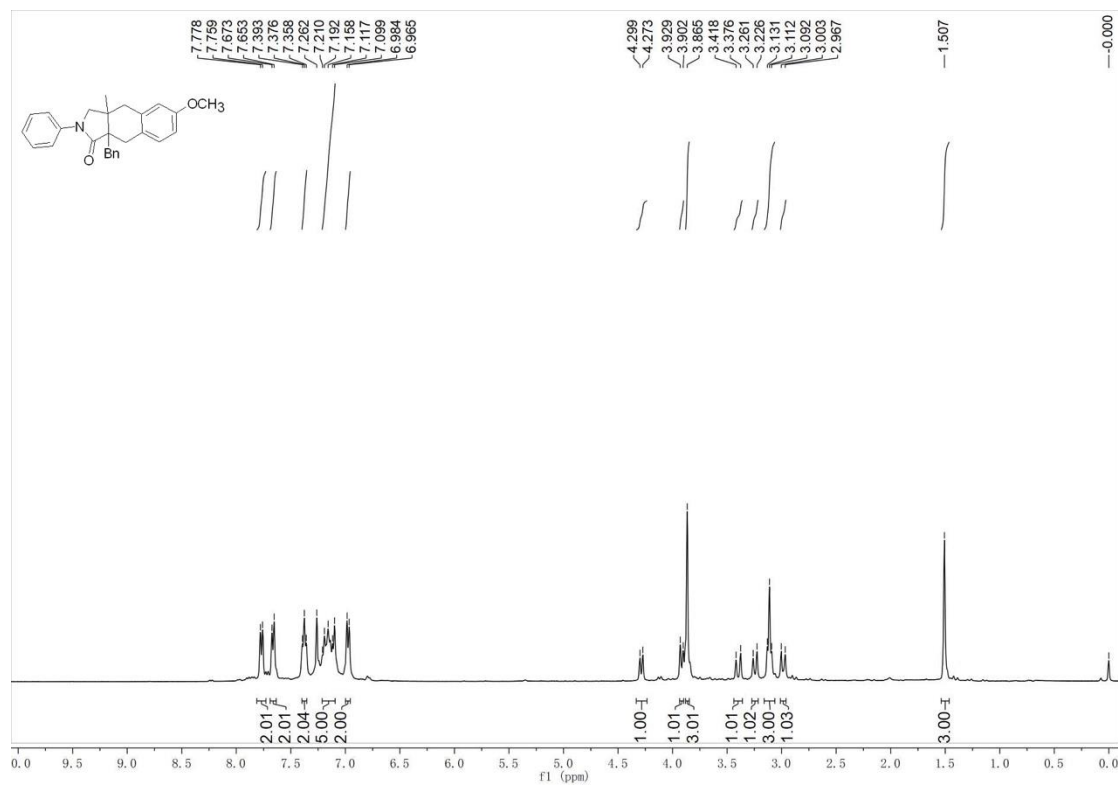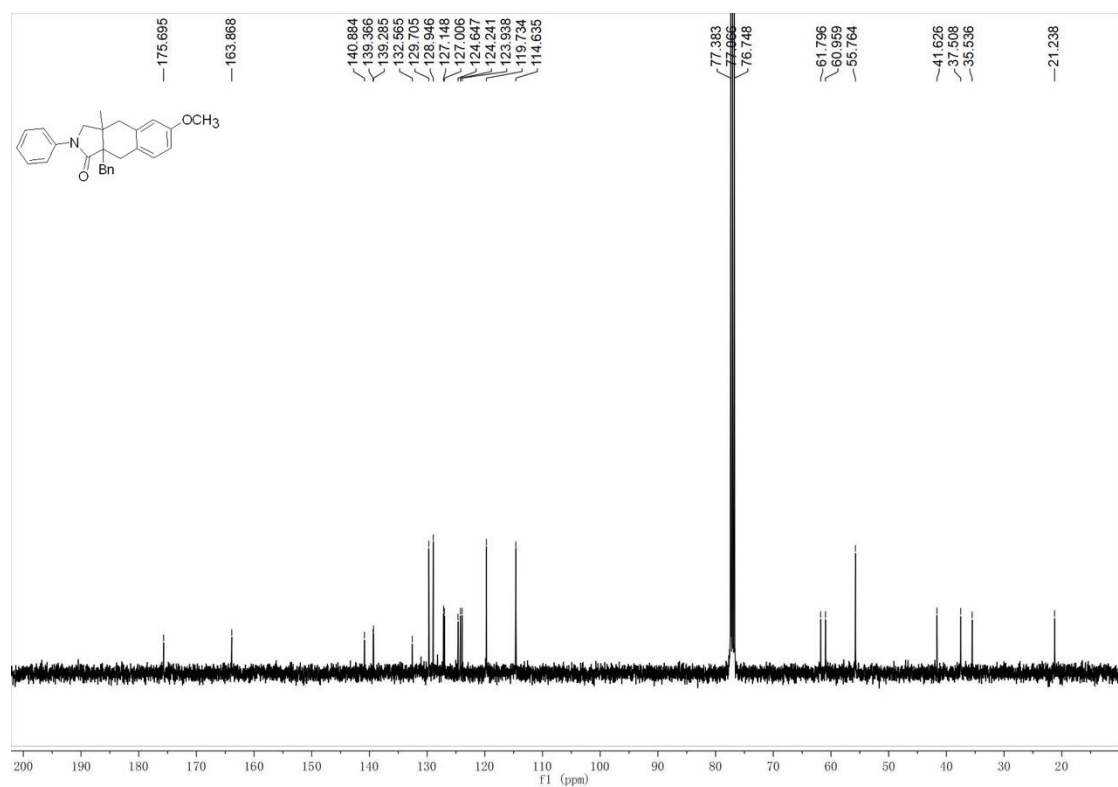

**6-Methoxy-3a-methyl-2,9a-diphenyl-2,3,3a,4,9,9a-hexahydro-1H-benzo[f]isoindol-1-one (3l)**

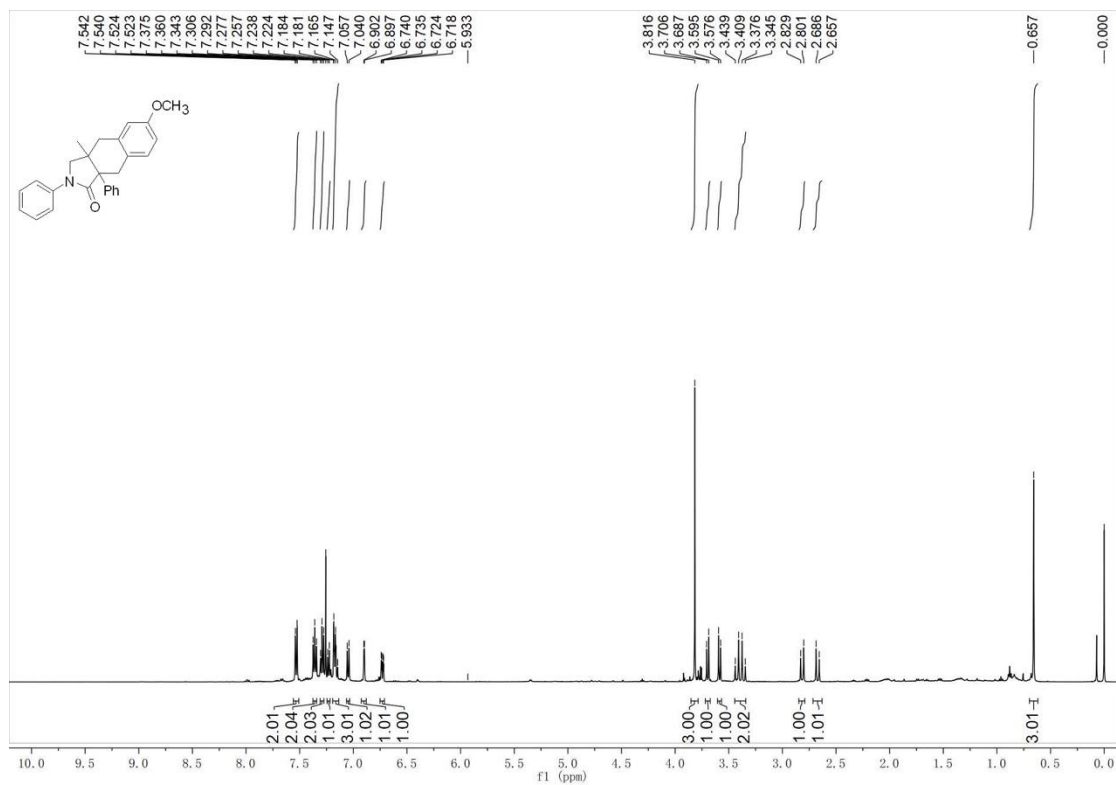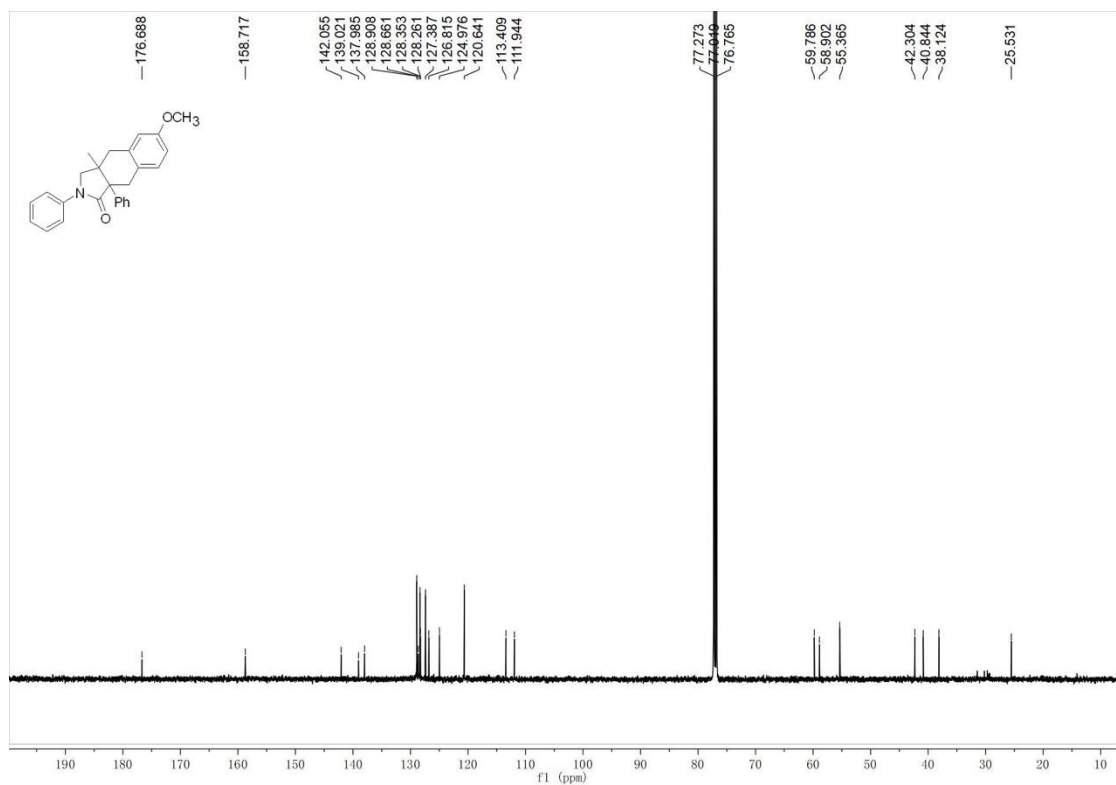



**4-(Iodomethyl)-3,4-dimethyl-1-phenyl-3-(tosylmethyl)pyrrolidin-2-one (4a)**

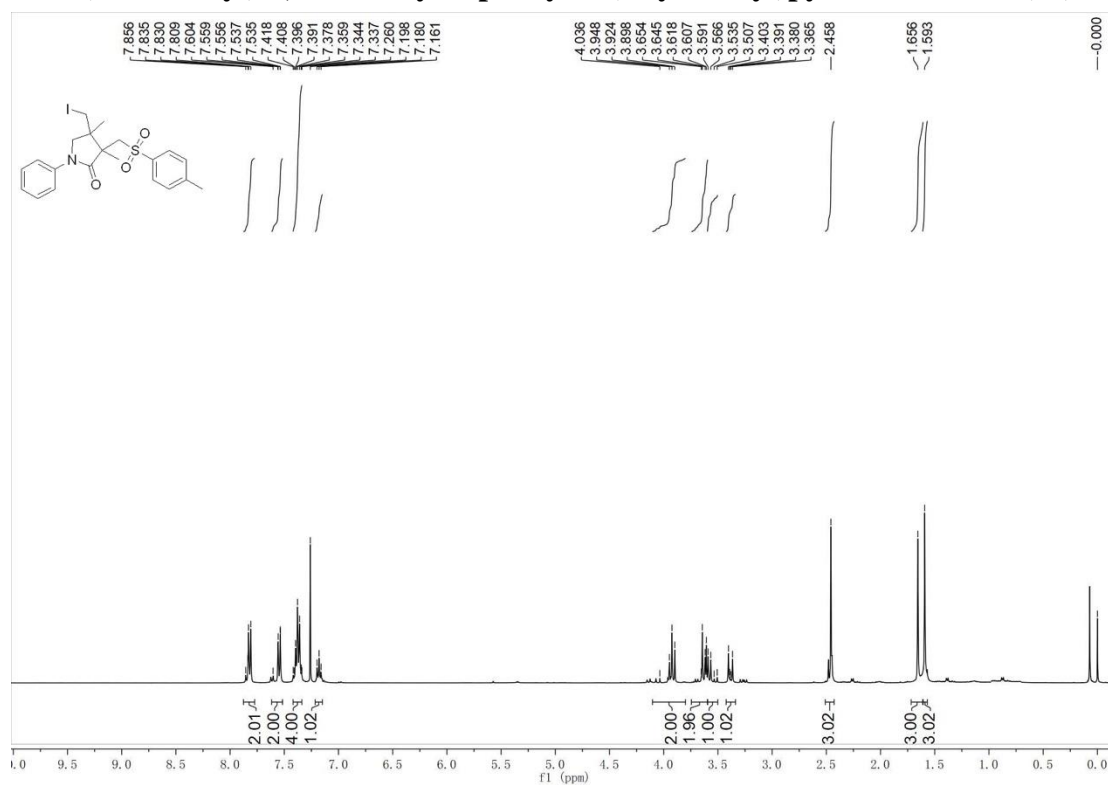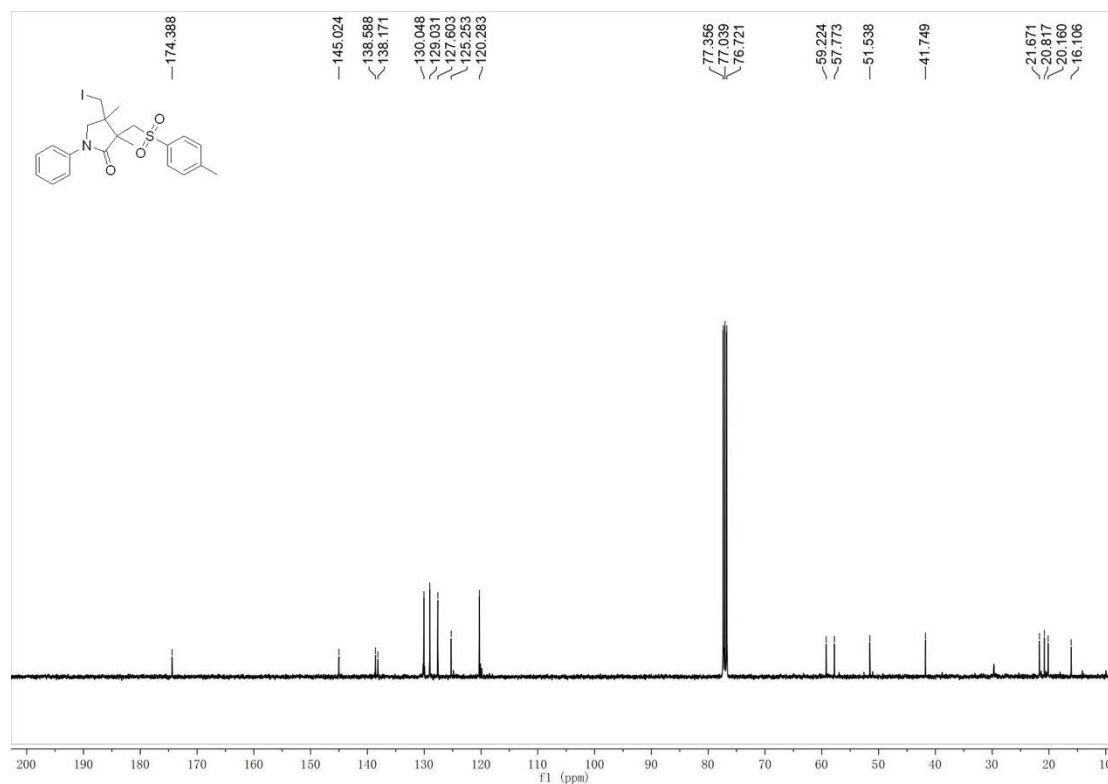

**4-(Iodomethyl)-3-(((4-methoxyphenyl)sulfonyl)methyl)-3,4-dimethyl-1-phenylpyrrolidin-2-one (4b)**

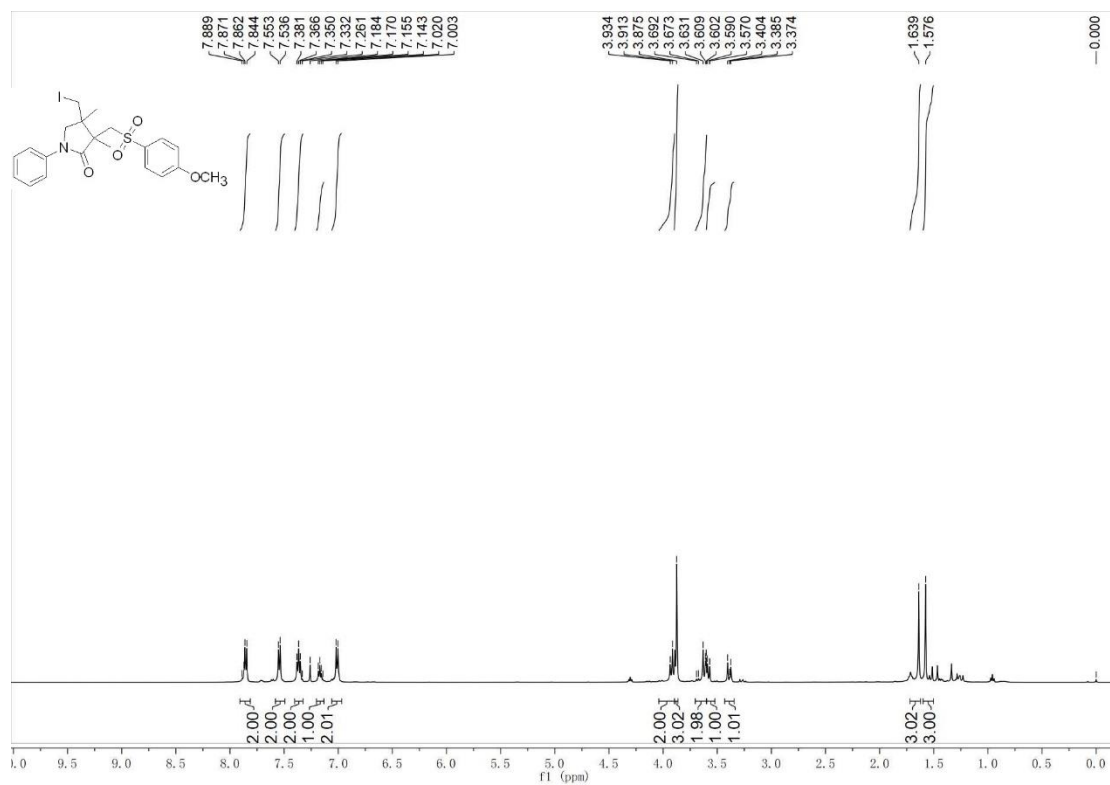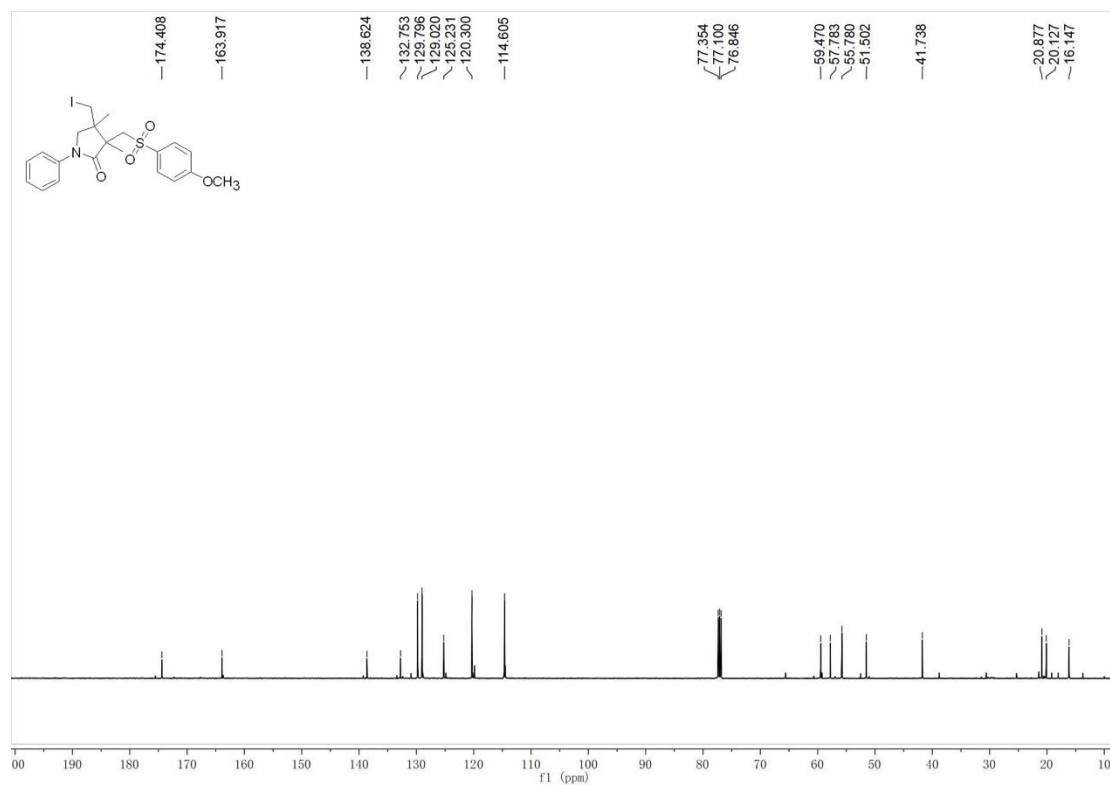

**4-(Iodomethyl)-3,4-dimethyl-1-phenyl-3-((phenylsulfonyl)methyl)pyrrolidin-2-one (4c)**

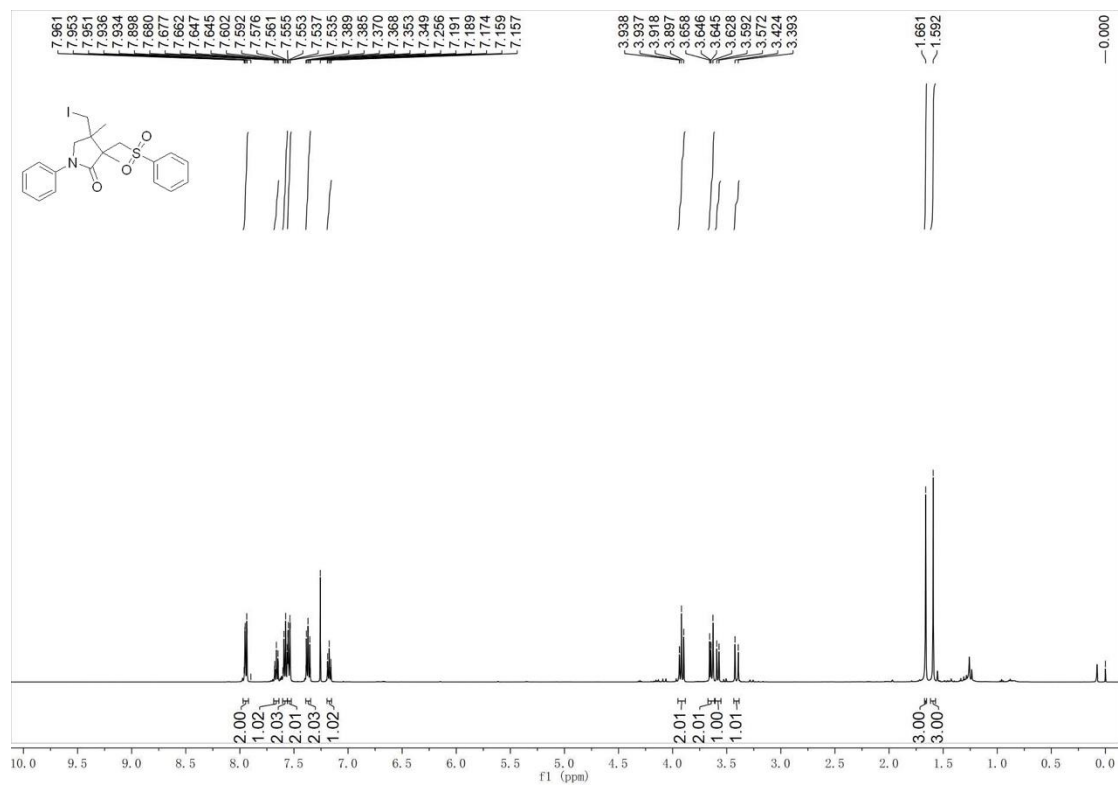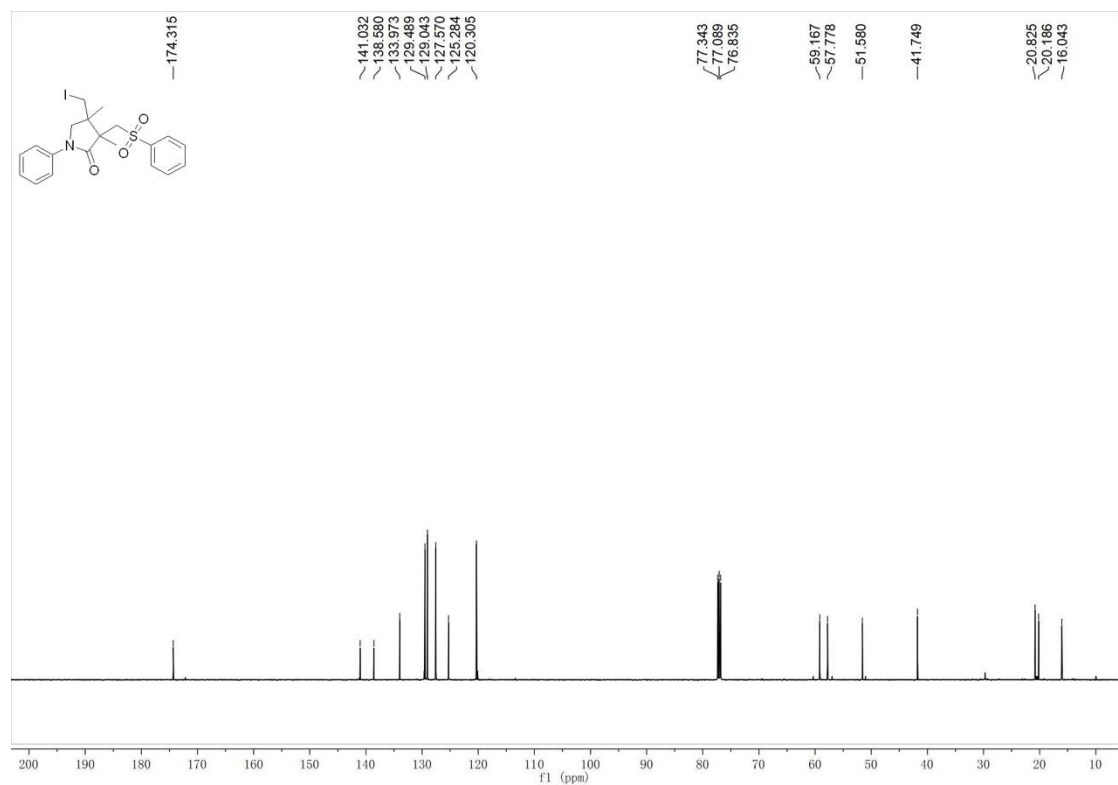

**3-(((4-Fluorophenyl)sulfonyl)methyl)-4-(iodomethyl)-3,4-dimethyl-1-phenylpyrrolidin-2-one (4d)**

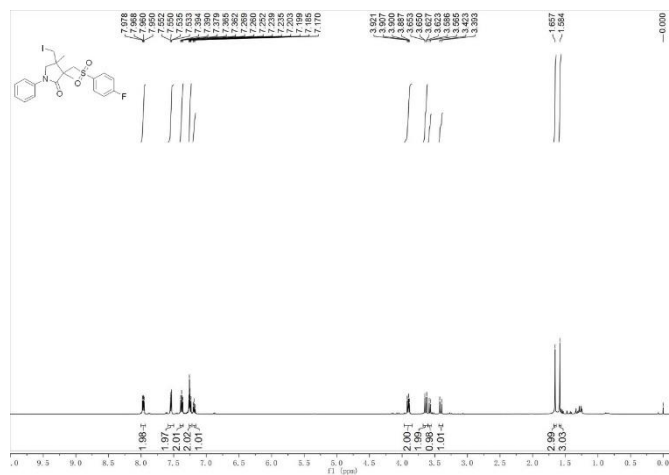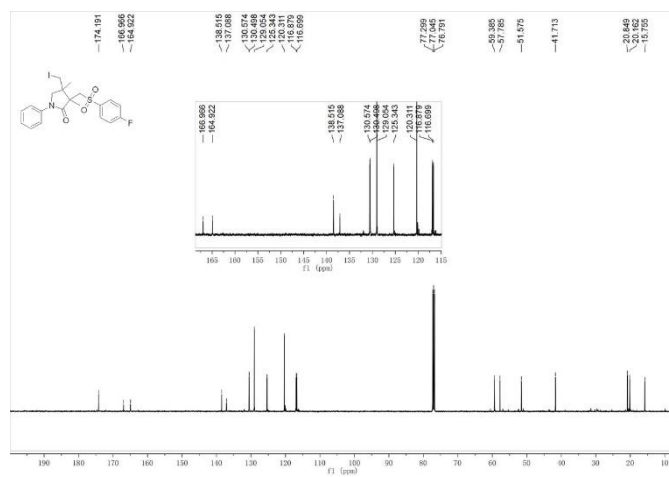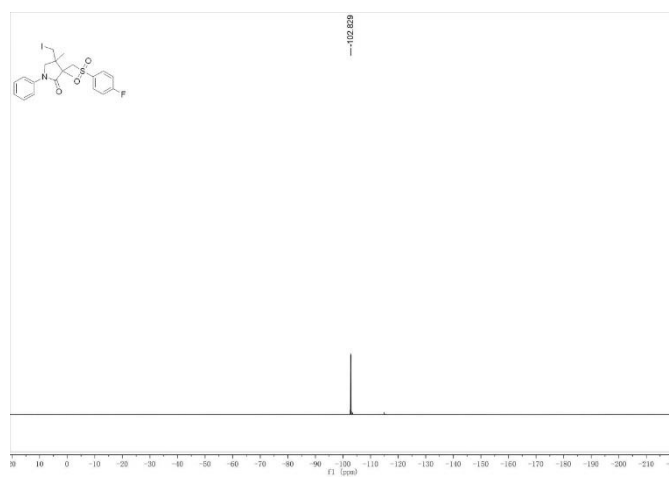

**3-(((4-Chlorophenyl)sulfonyl)methyl)-4-(iodomethyl)-3,4-dimethyl-1-phenylpyrrolidin-2-one (4e)**

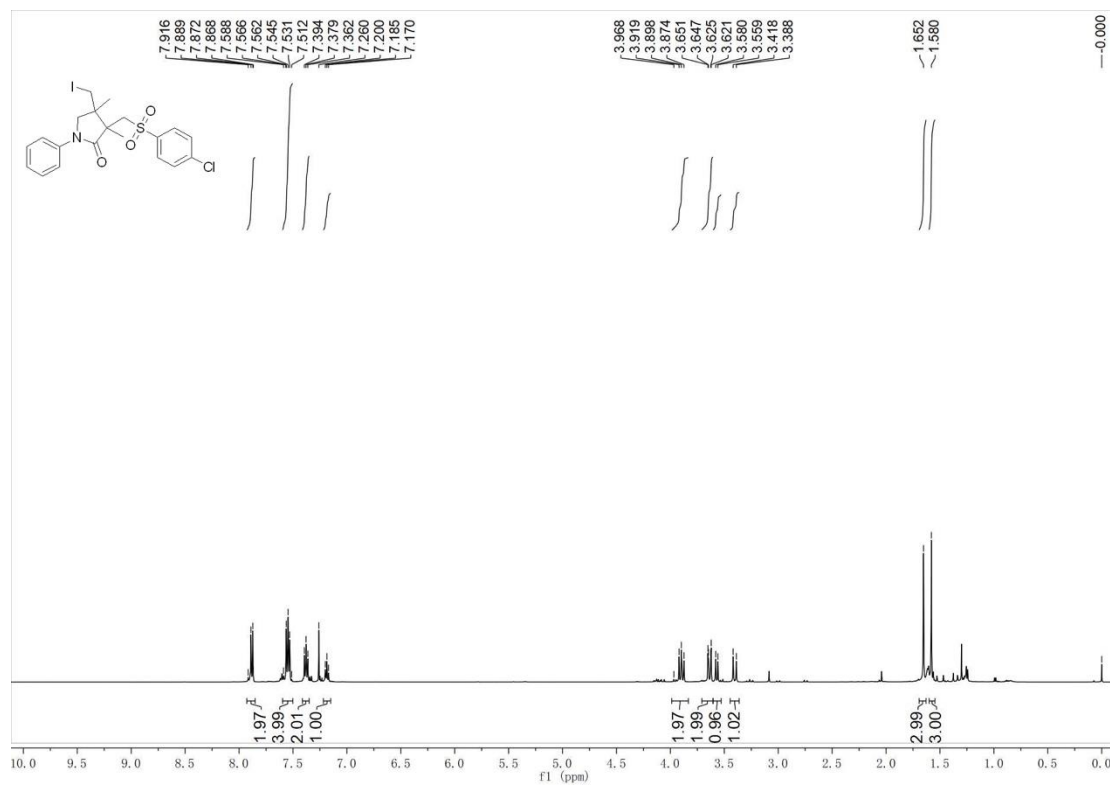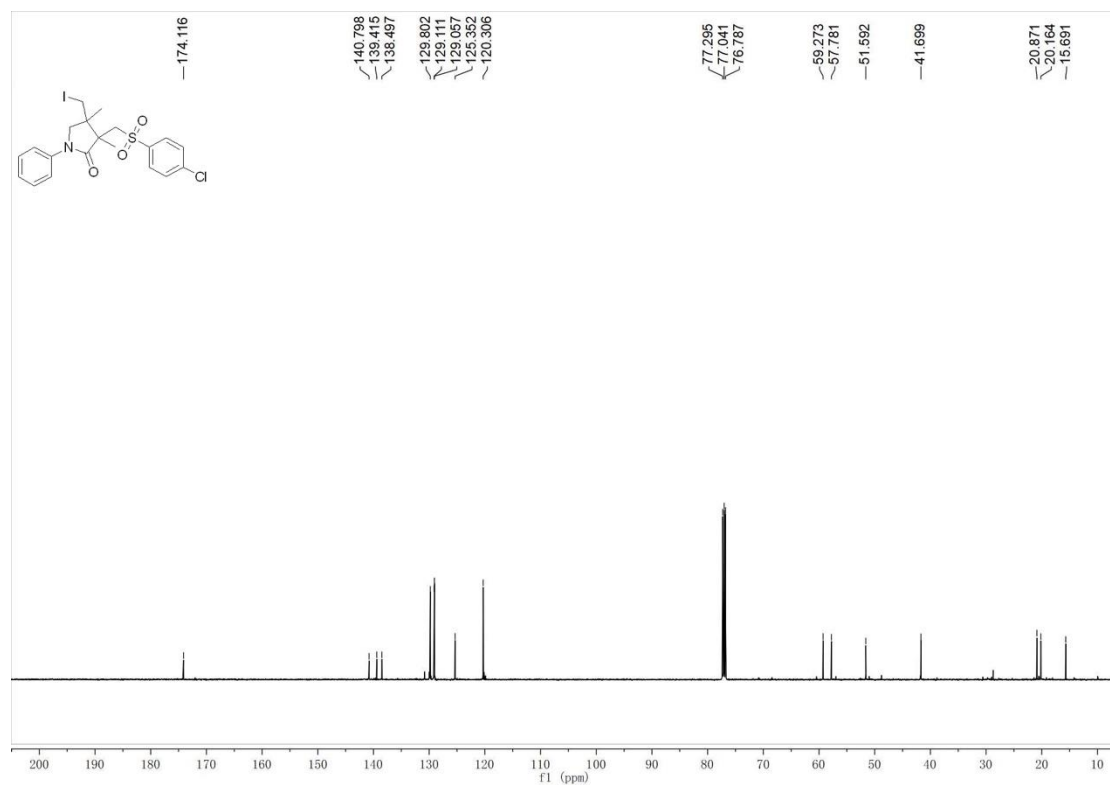

**3-(((4-Bromophenyl)sulfonyl)methyl)-4-(iodomethyl)-3,4-dimethyl-1-phenylpyrrolidin-2-one (4f)**

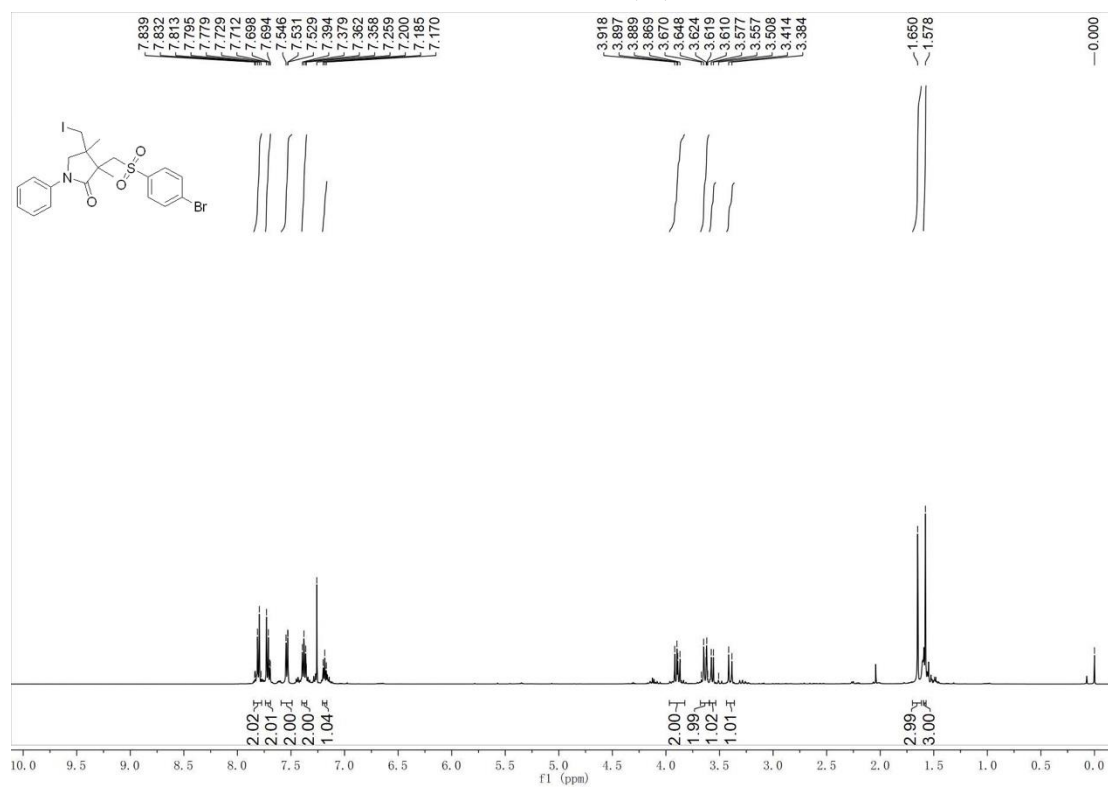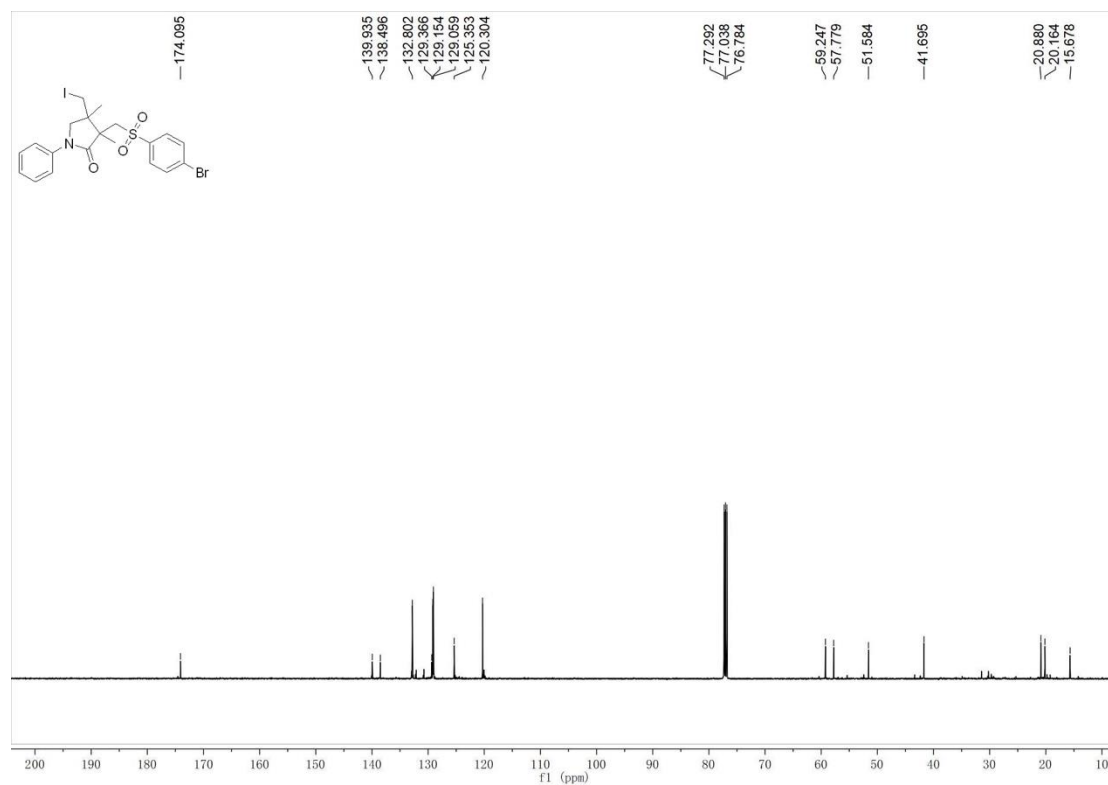

**4-(Iodomethyl)-3,4-dimethyl-3-(((4-nitrophenyl)sulfonyl)methyl)-1-phenylpyrrolidin-2-one (4g)**

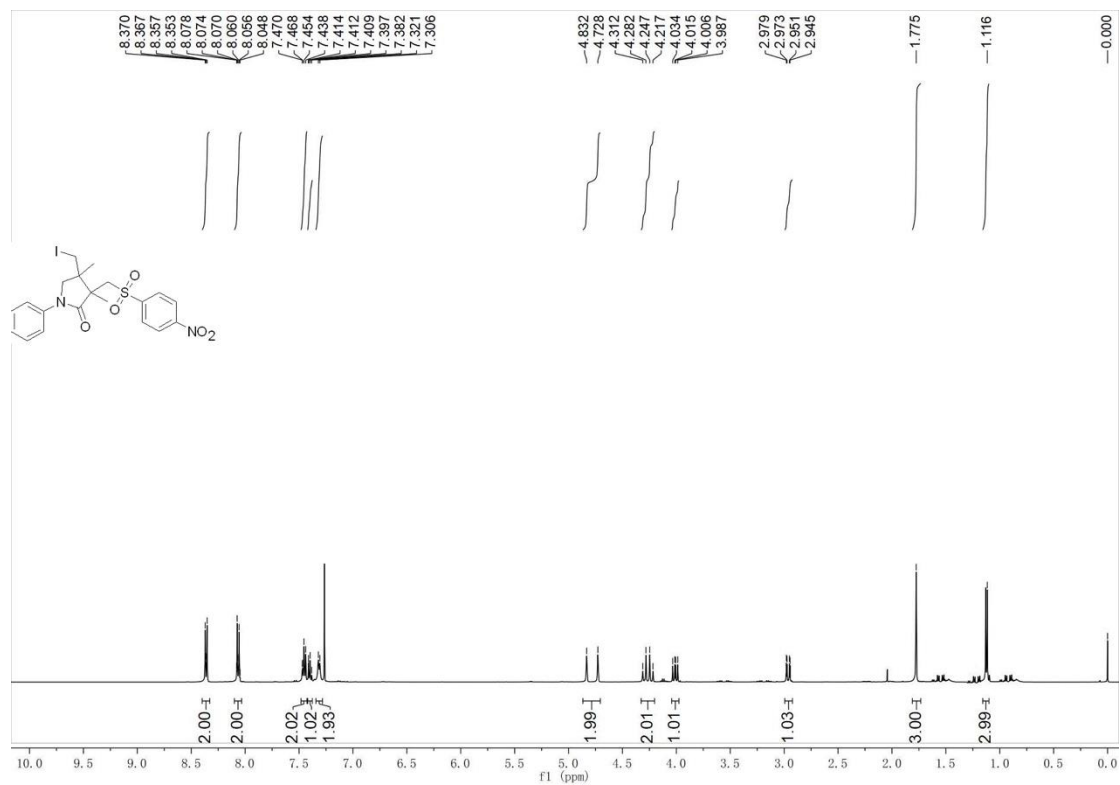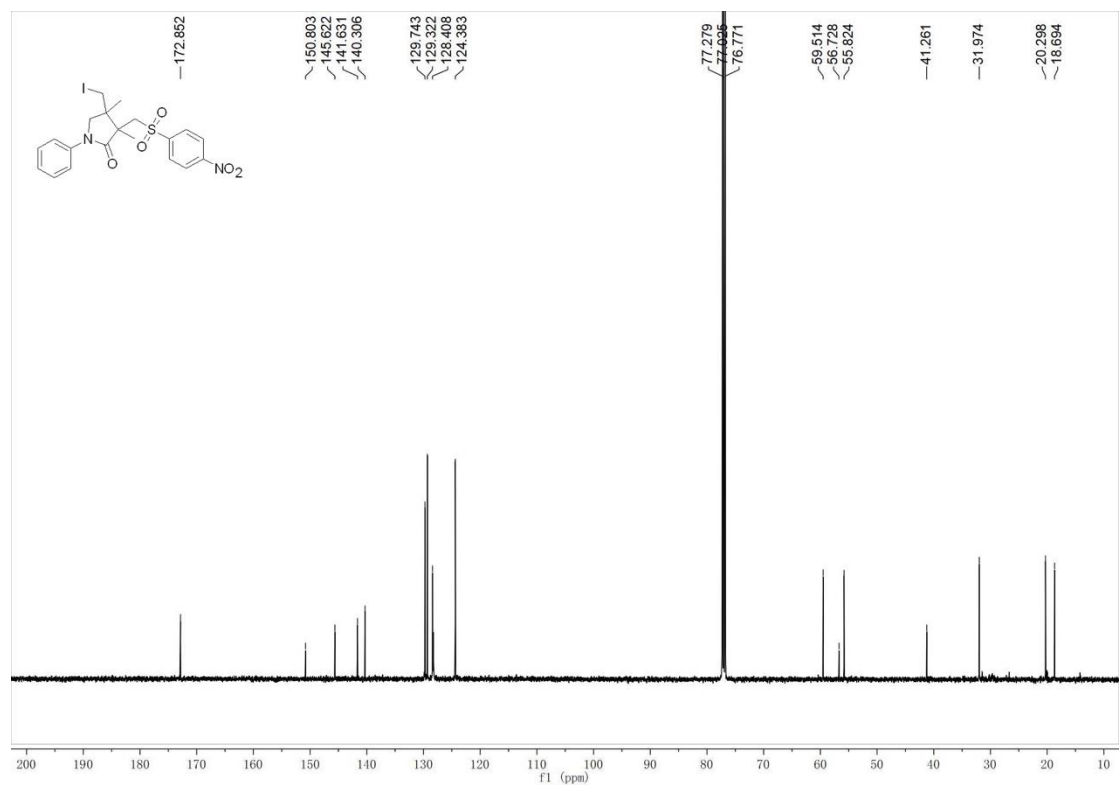

**4-(Iodomethyl)-3-(((2-methoxyphenyl)sulfonyl)methyl)-3,4-dimethyl-1-phenylpyrrolidin-2-one (4h)**

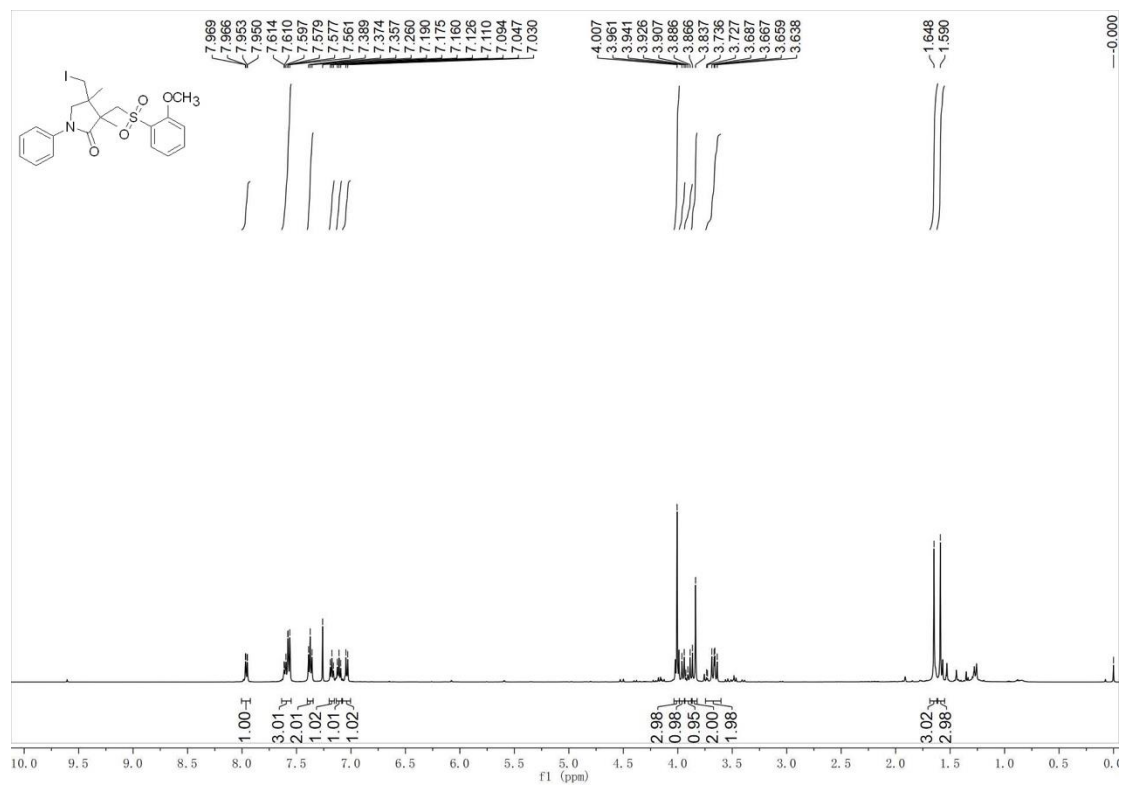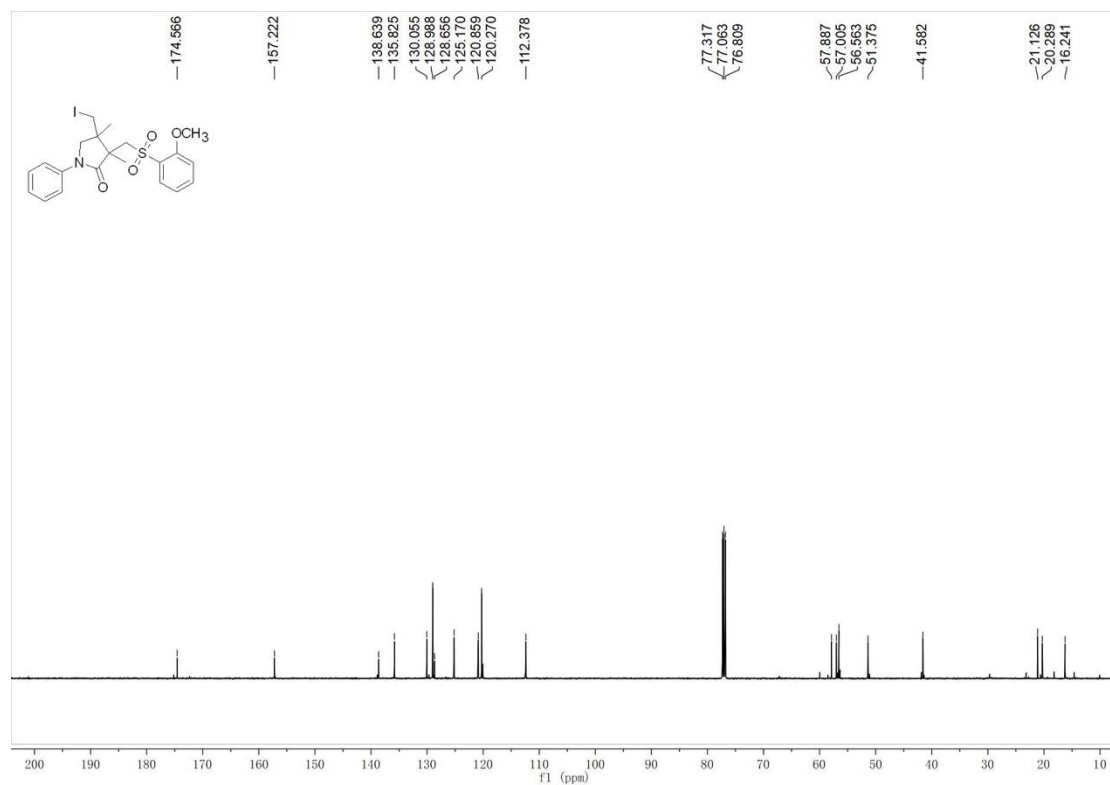



**4-(Iodomethyl)-3,4-dimethyl-1-phenyl-3-((*o*-tolylsulfonyl)methyl)pyrrolidin-2-one (4i)**

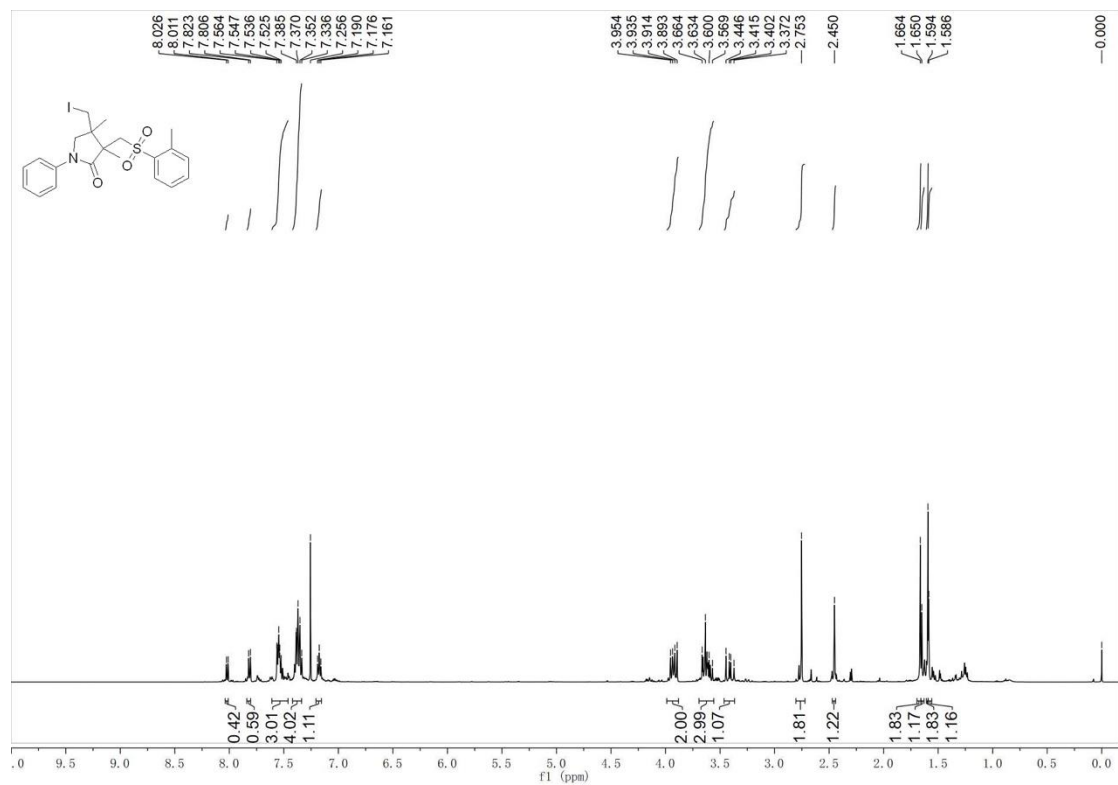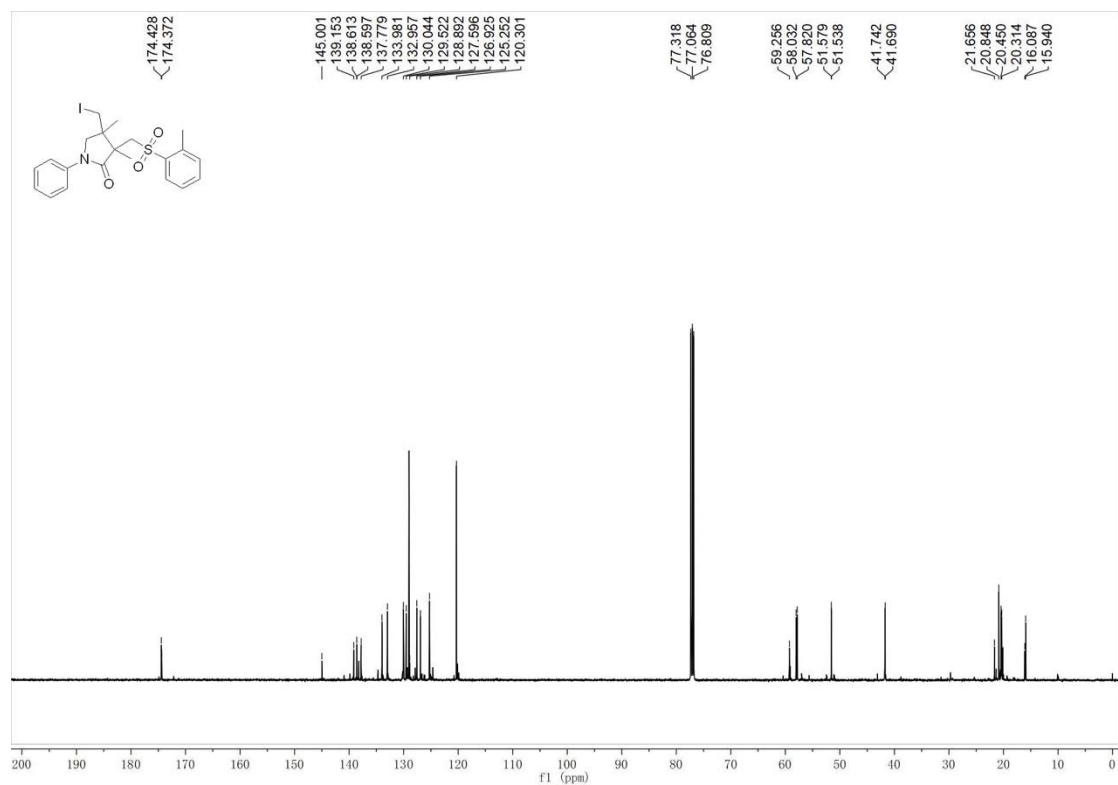

**3-(((2-Chlorophenyl)sulfonyl)methyl)-4-(iodomethyl)-3,4-dimethyl-1-phenylpyrrolidin-2-one (4j)**

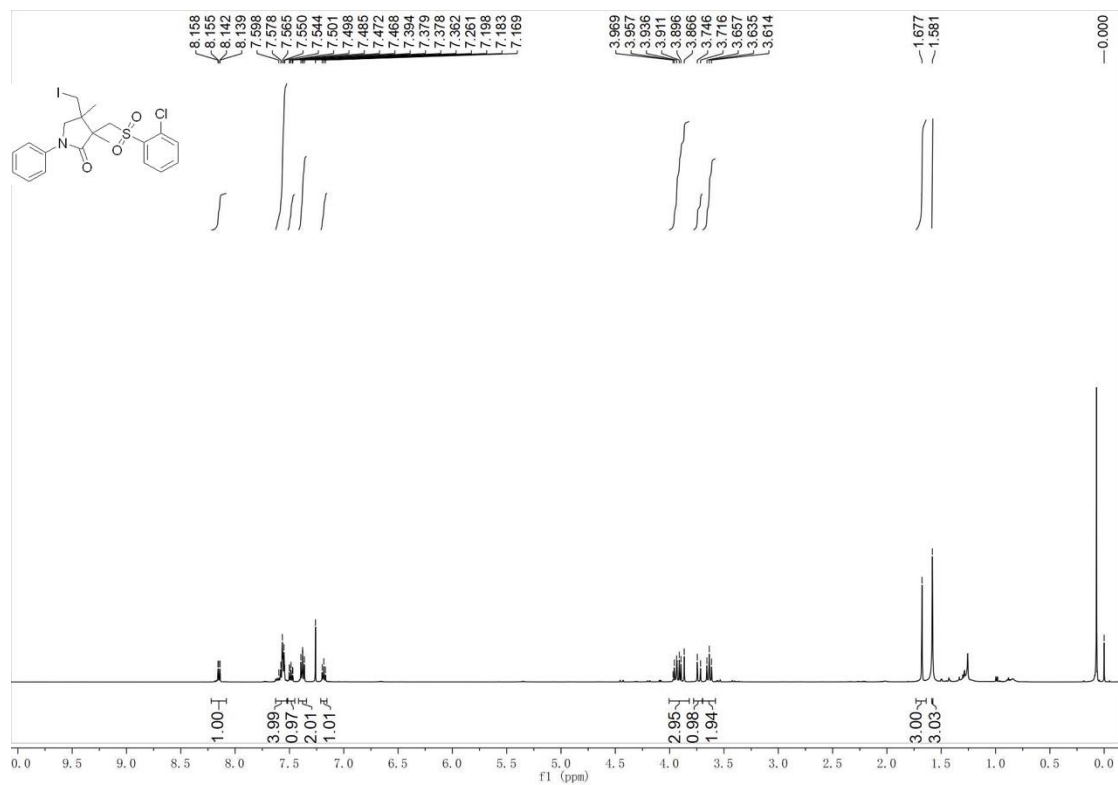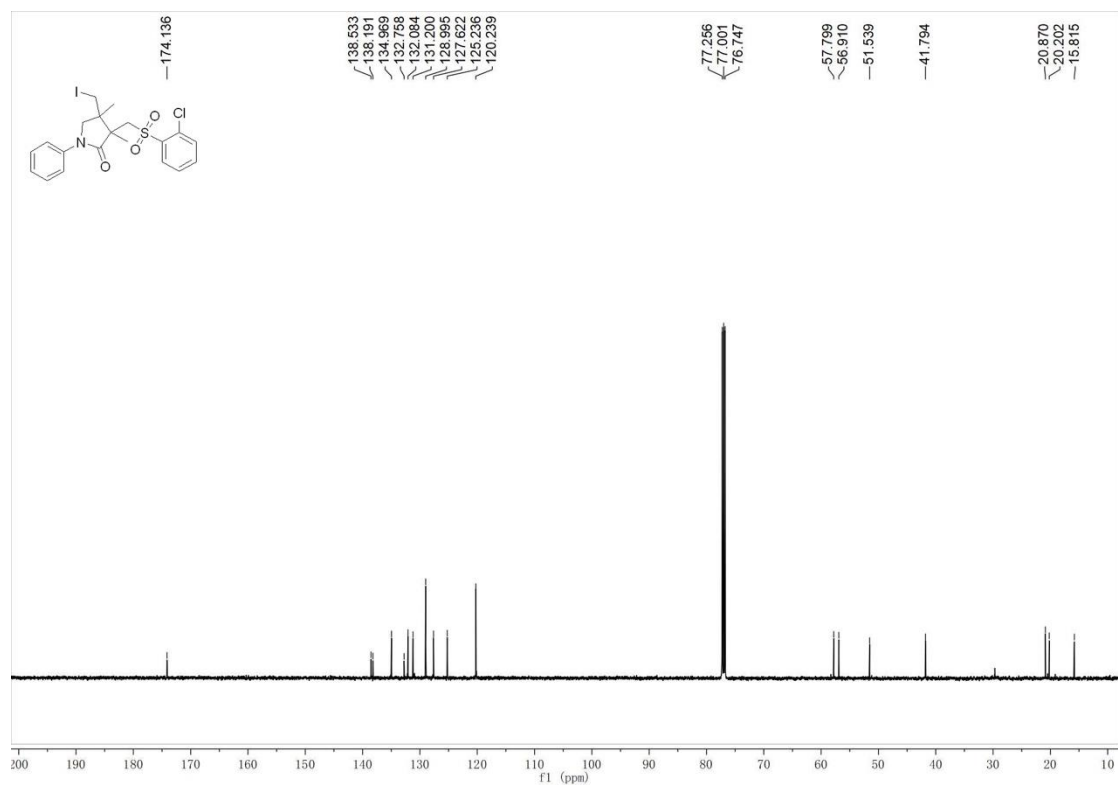

**4-(Iodomethyl)-3,4-dimethyl-1-phenyl-3-((*m*-tolylsulfonyl)methyl)pyrrolidin-2-one (4k)**

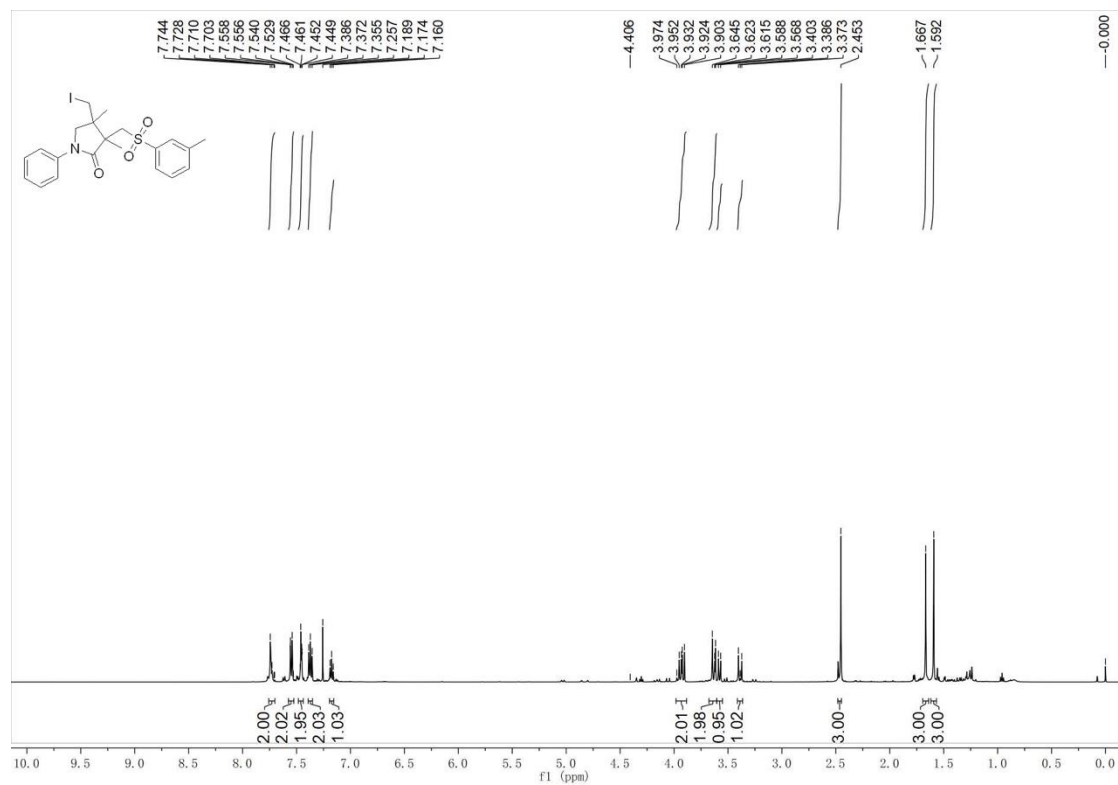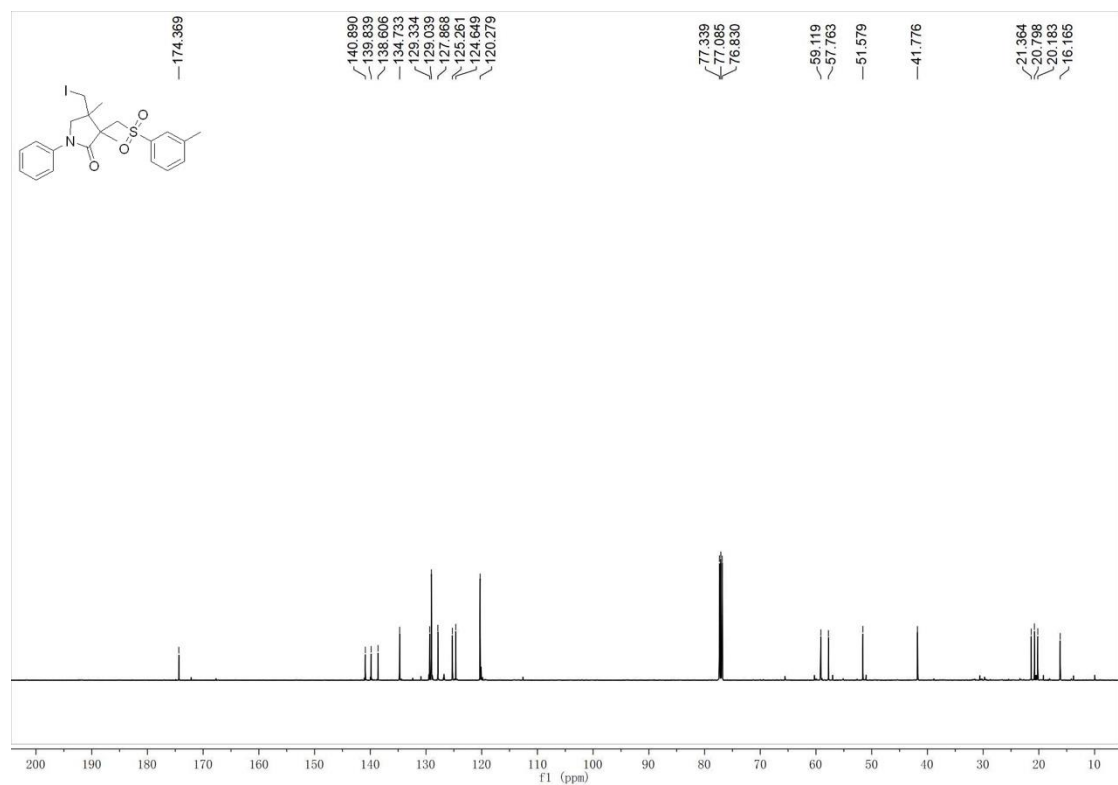

**3-(((3-Chlorophenyl)sulfonyl)methyl)-4-(iodomethyl)-3,4-dimethyl-1-phenylpyrrolidin-2-one (4l)**

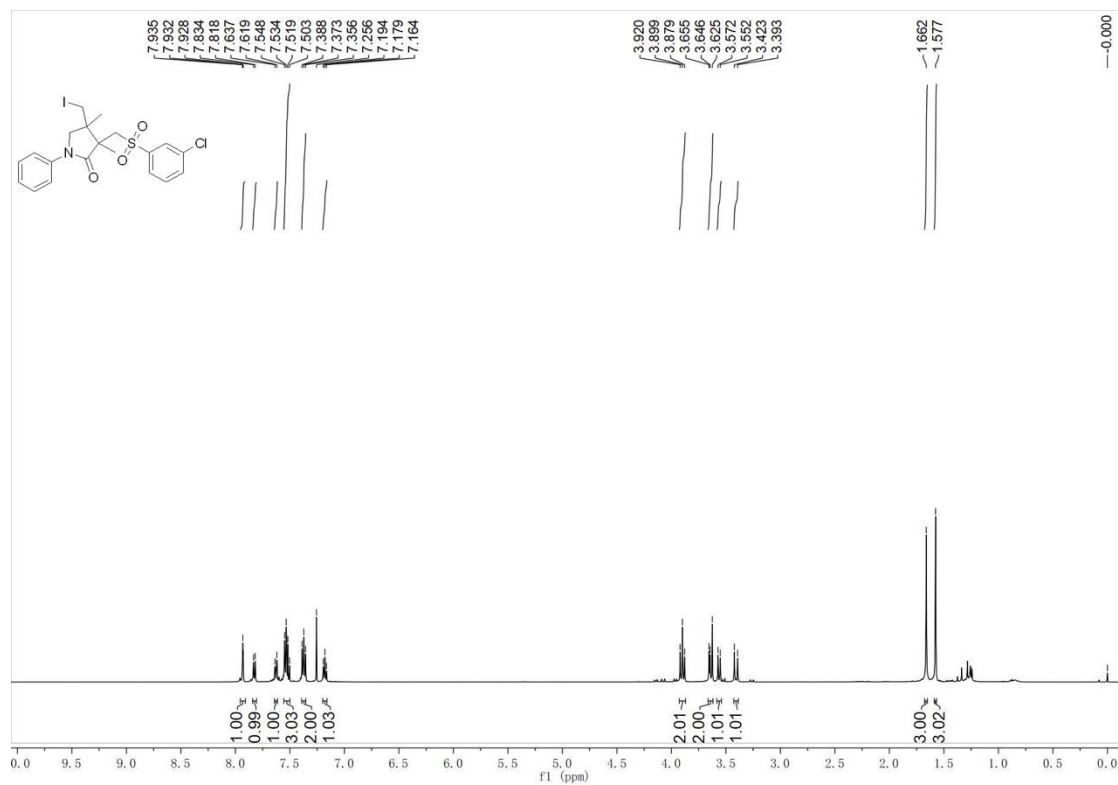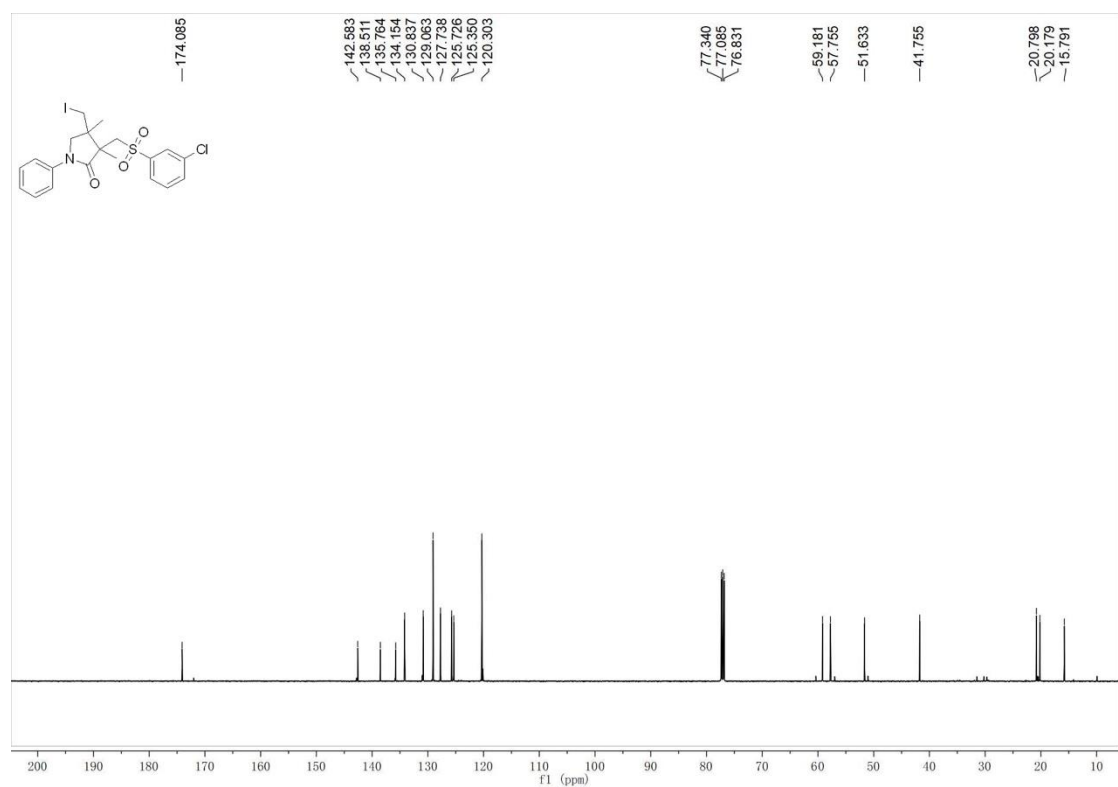

**4-(Iodomethyl)-3,4-dimethyl-3-((naphthalen-2-ylsulfonyl)methyl)-1-phenylpyrrolidin-2-one (4m)**

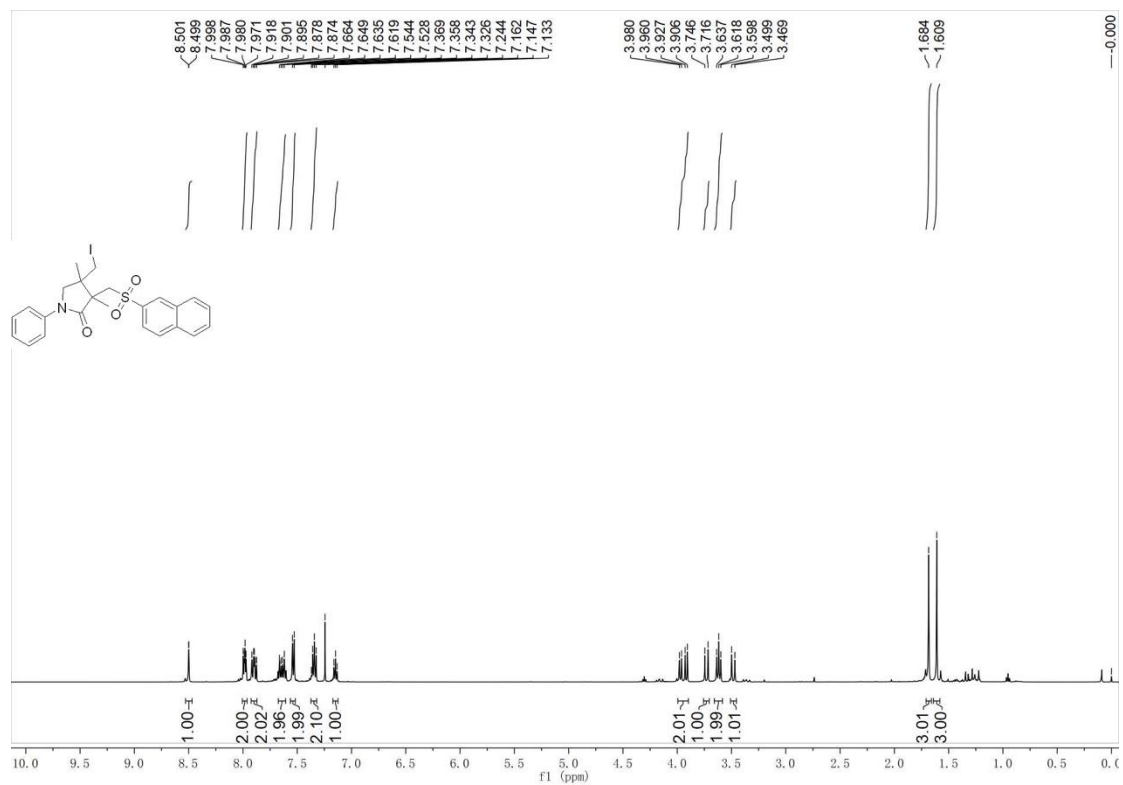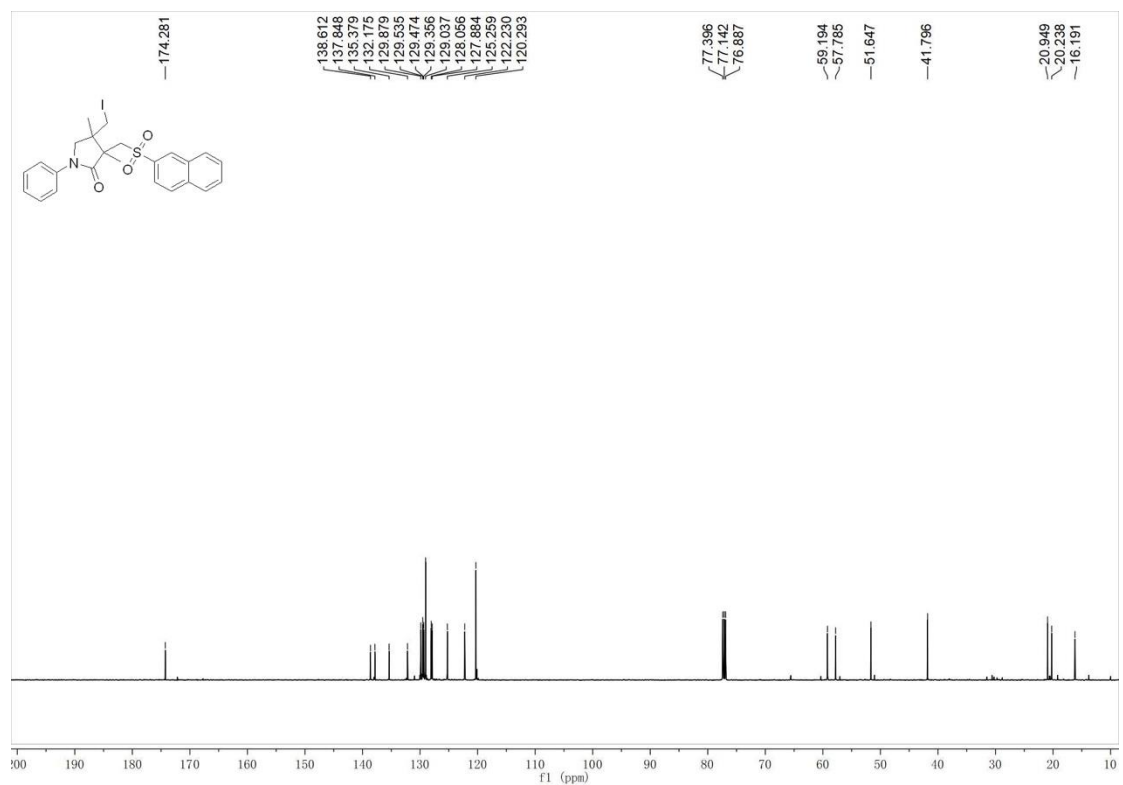

**4-(Iodomethyl)-3,4-dimethyl-1-phenyl-3-((thiophen-2-ylsulfonyl)methyl)pyrrolidin-2-one (4n)**

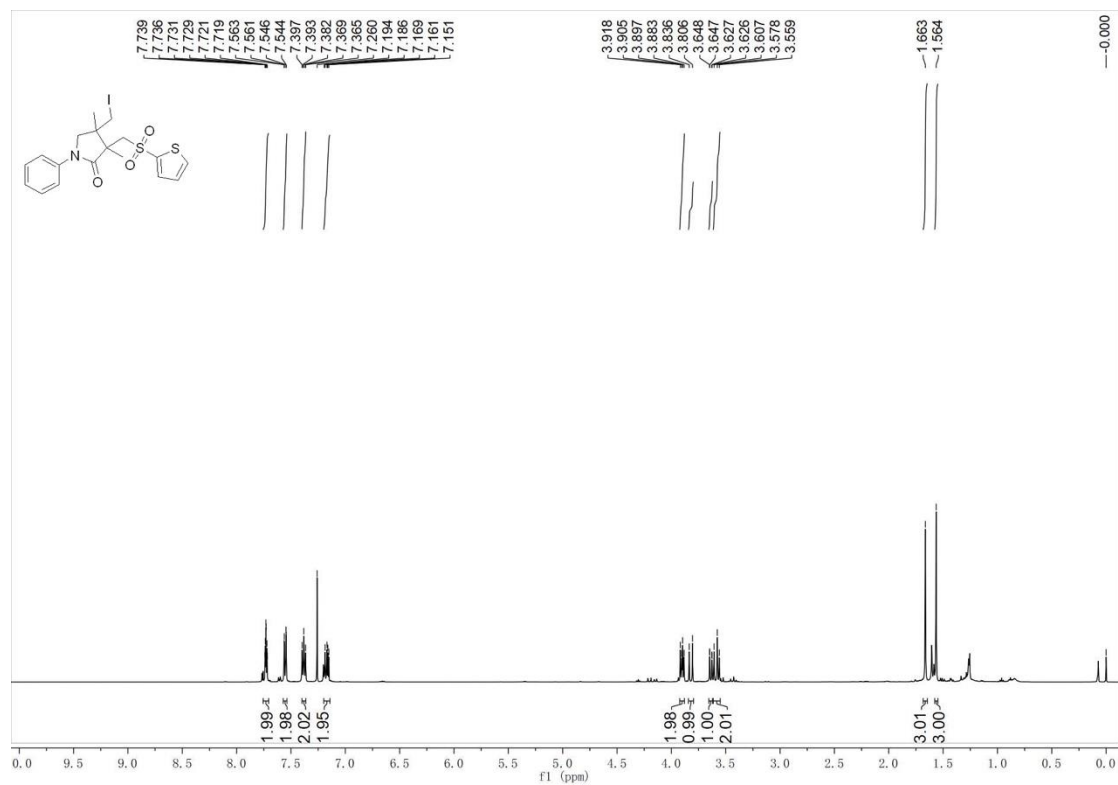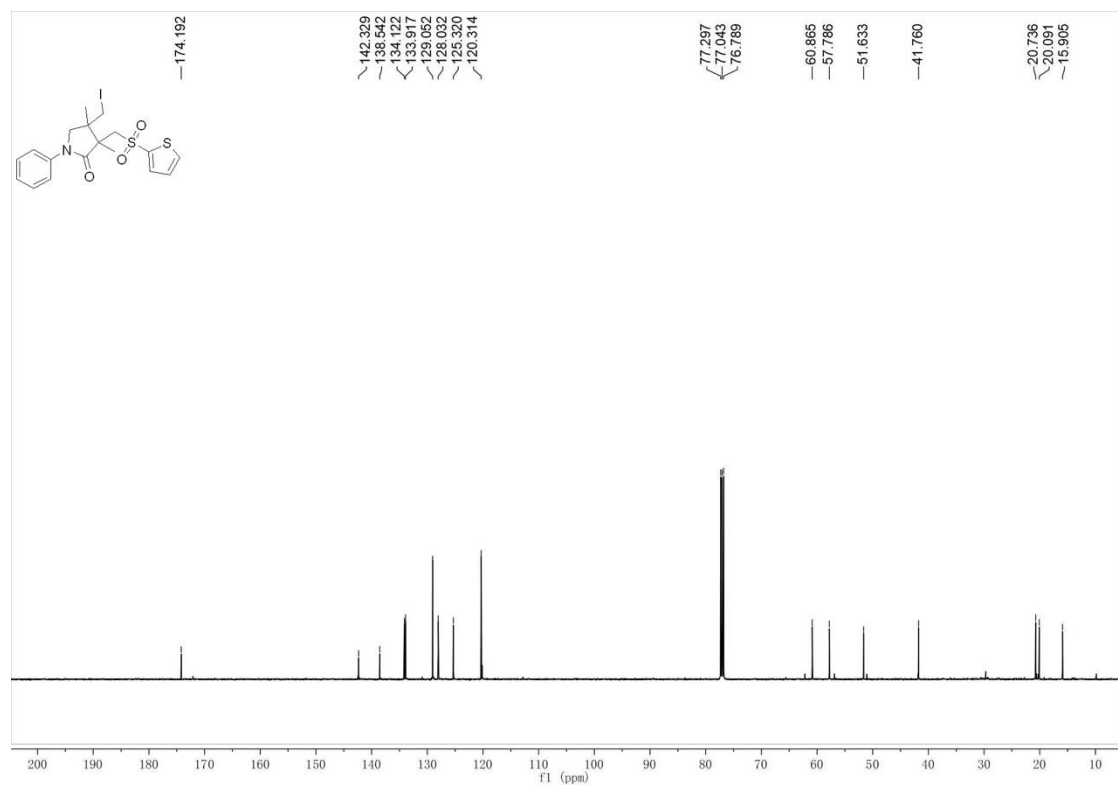

**3-((Ethylsulfonyl)methyl)-4-(iodomethyl)-3,4-dimethyl-1-phenylpyrrolidin-2-one  
(4o)**

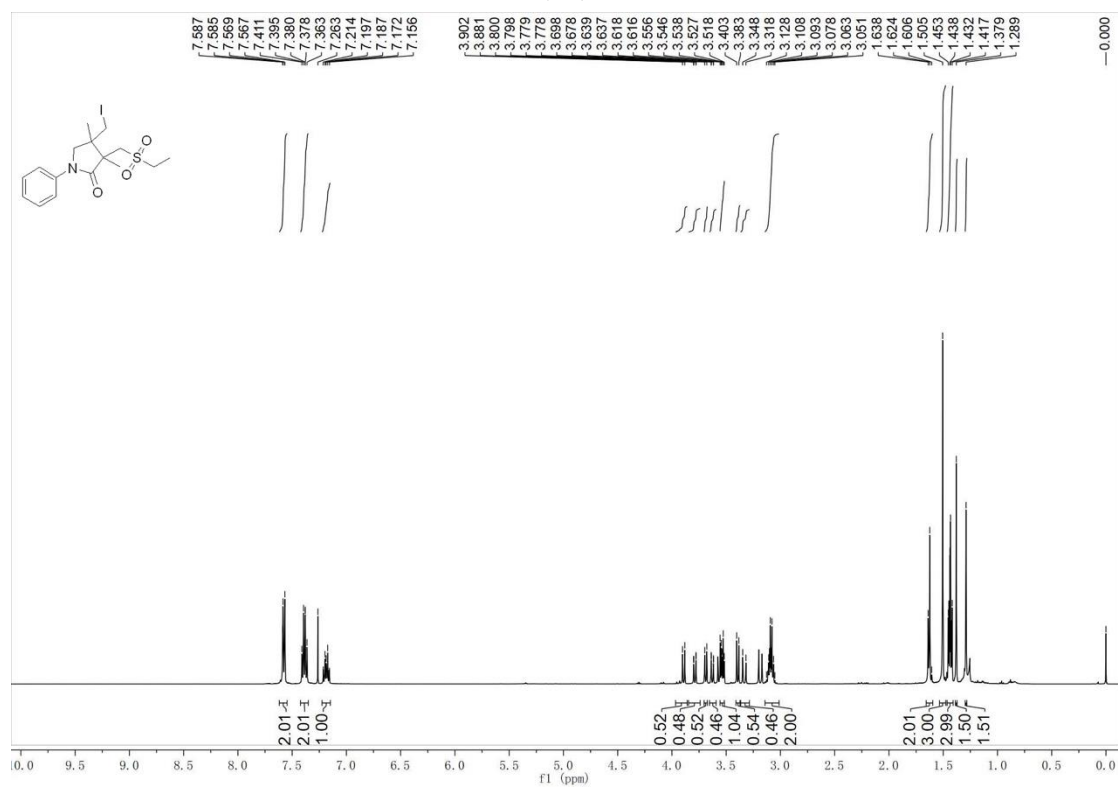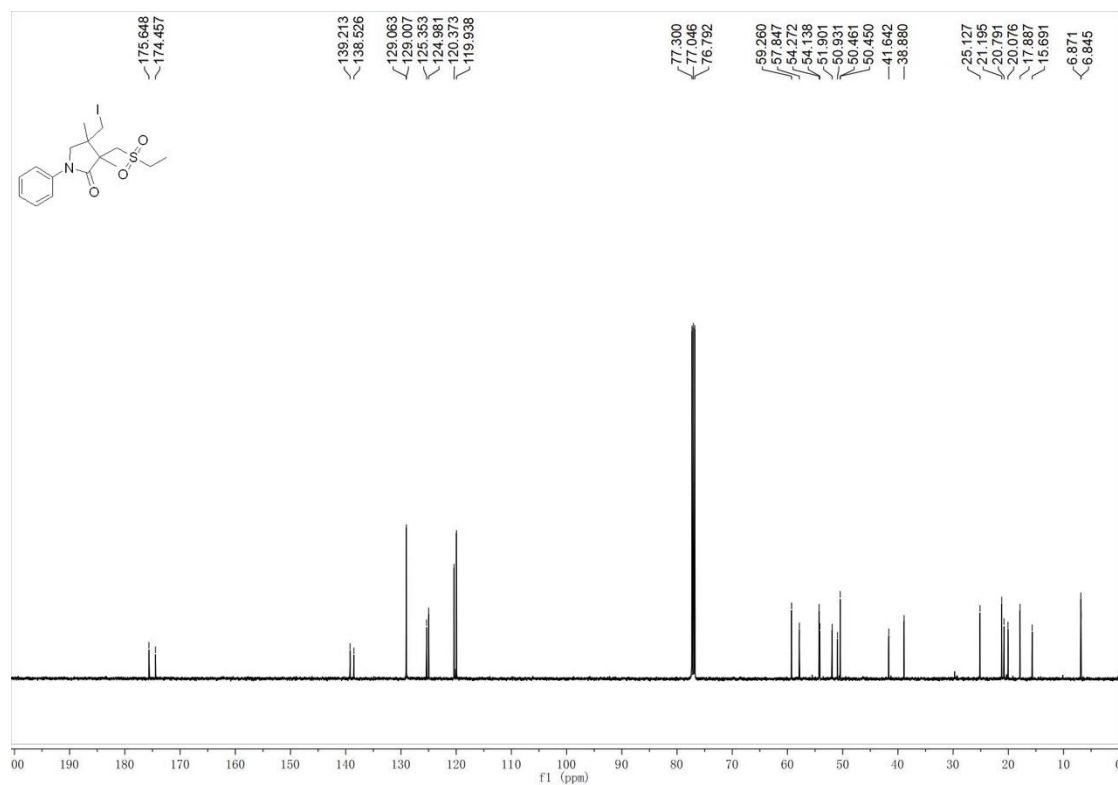

**3-((Butylsulfonyl)methyl)-4-(iodomethyl)-3,4-dimethyl-1-phenylpyrrolidin-2-one  
(4p)**

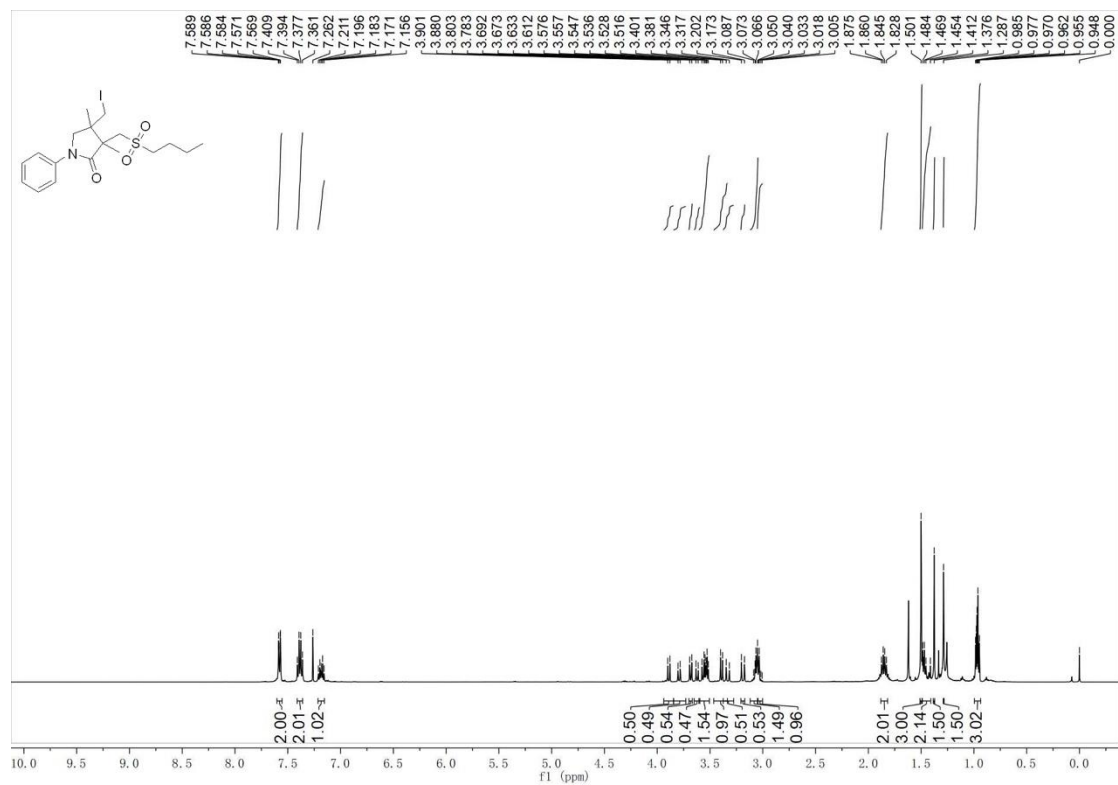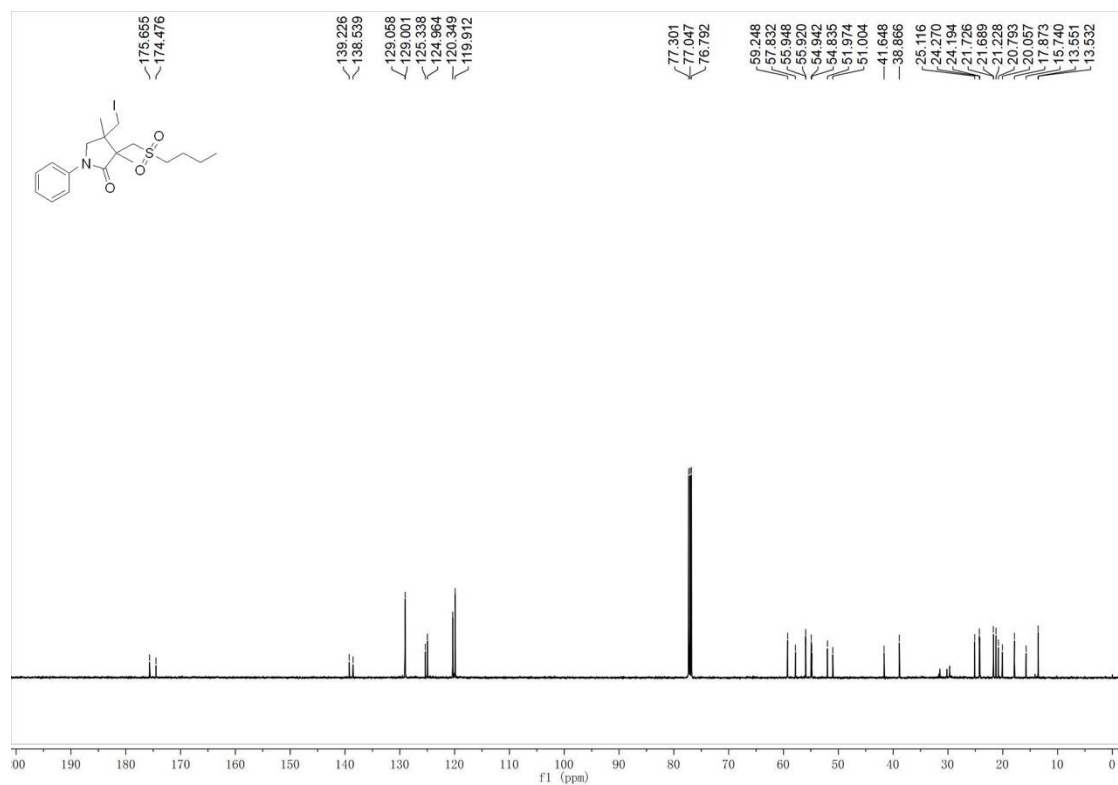



**4-(Iodomethyl)-1-(4-methoxyphenyl)-3-(((4-methoxyphenyl)sulfonyl)methyl)-3,4-dimethylpyrrolidin-2-one (4q)**

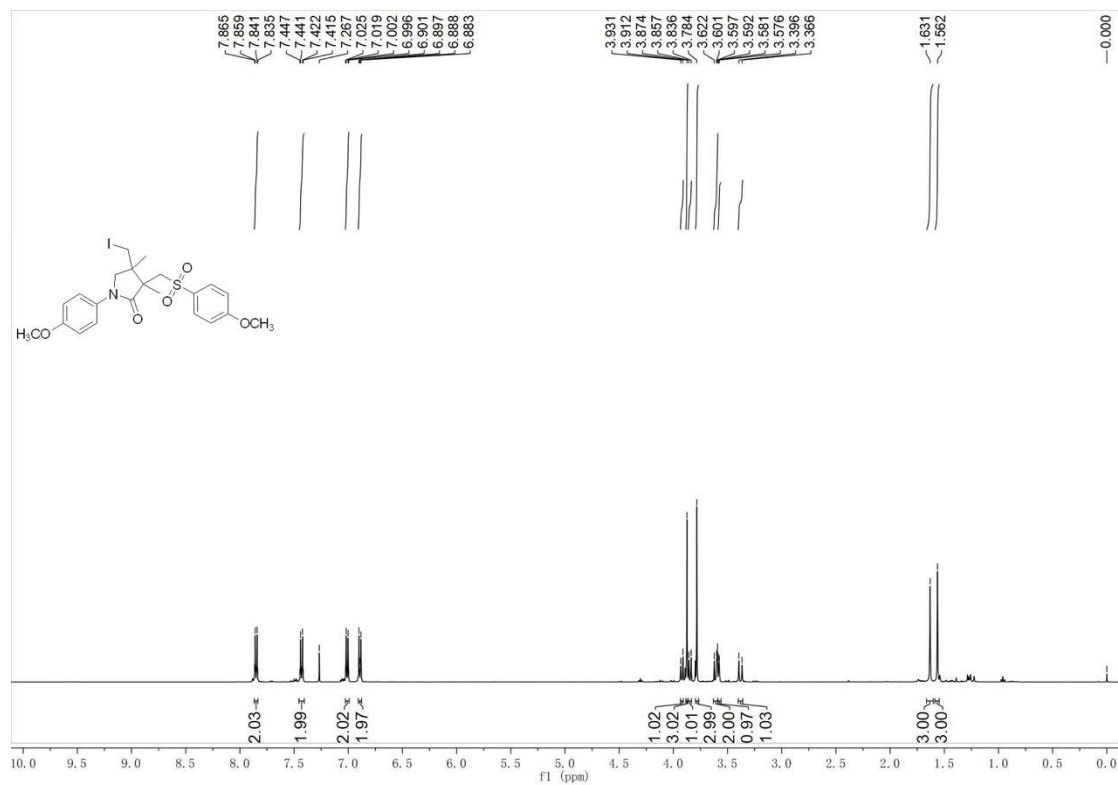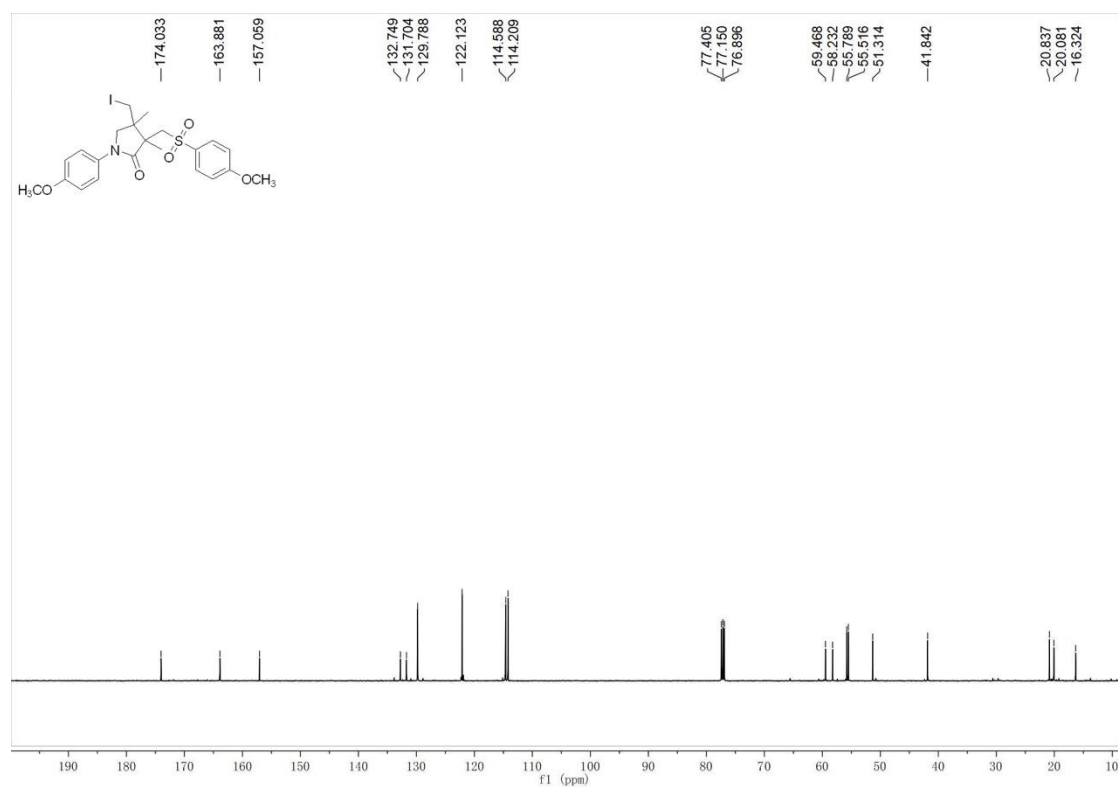

**4-(Iodomethyl)-3-(((4-methoxyphenyl)sulfonyl)methyl)-3,4-dimethyl-1-(*p*-tolyl)pyrrolidin-2-one (4r)**

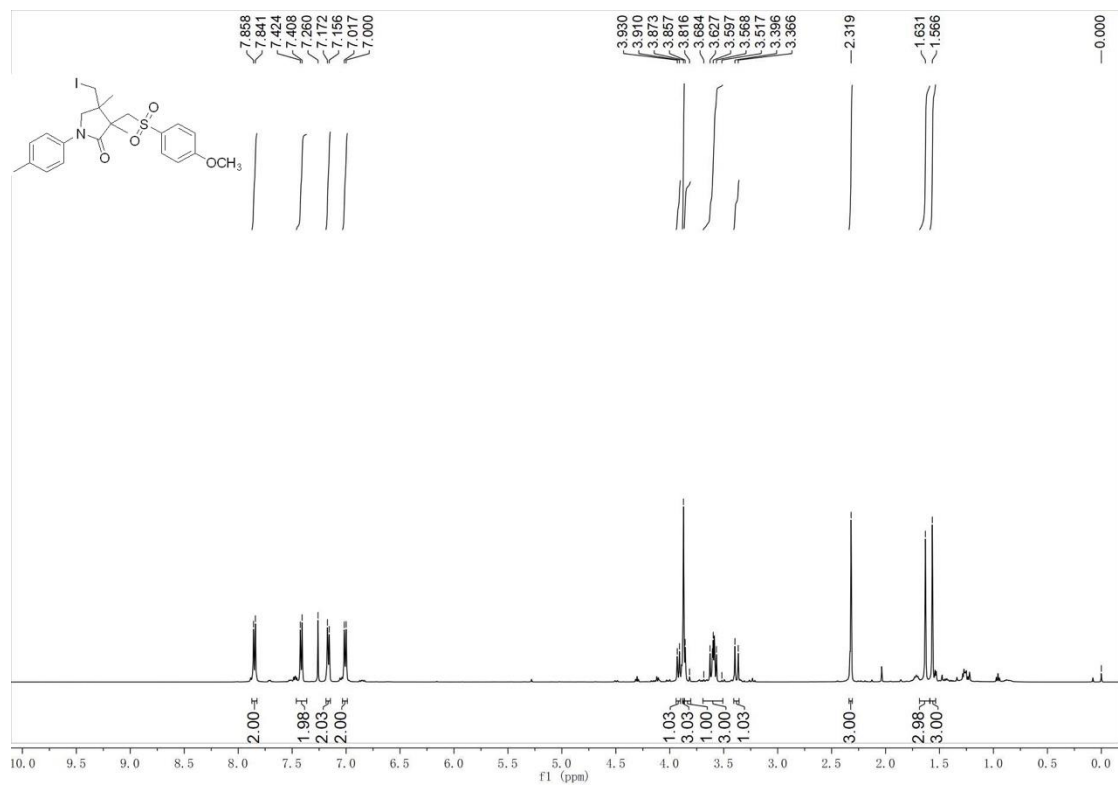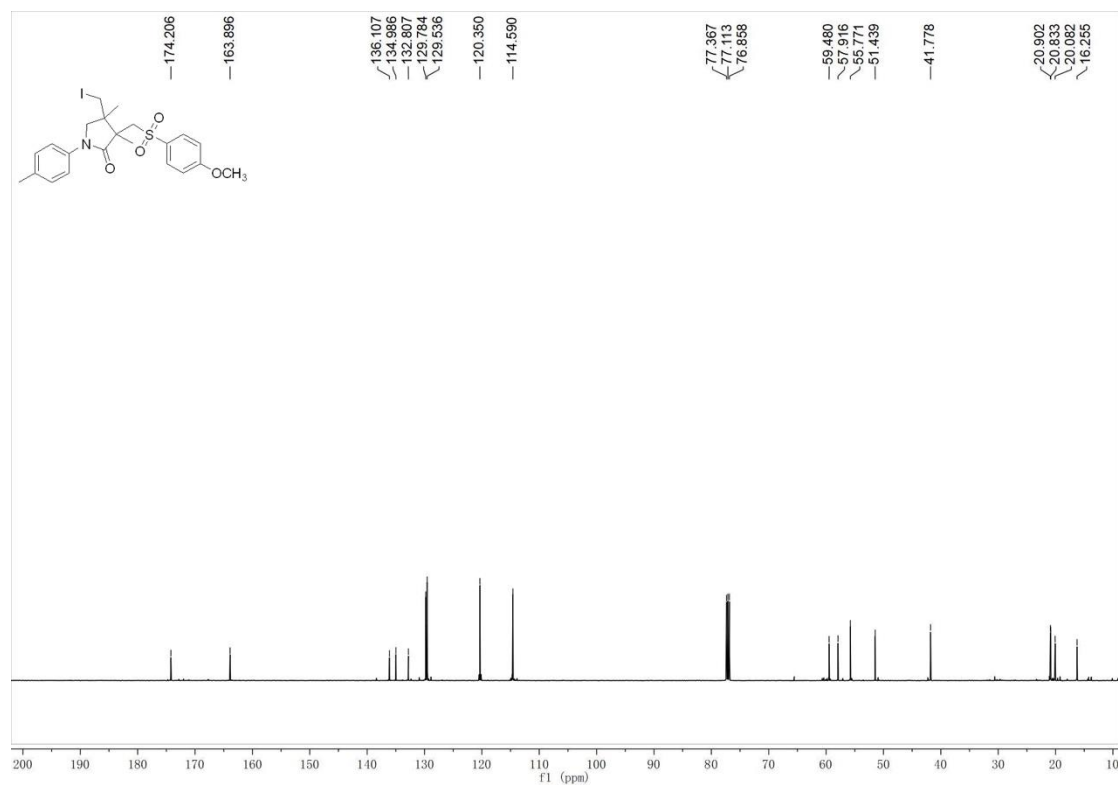

# 1-(4-Fluorophenyl)-4-(iodomethyl)-3-(((4-methoxyphenyl)sulfonyl)methyl)-3,4-dimethylpyrrolidin-2-one (4s)

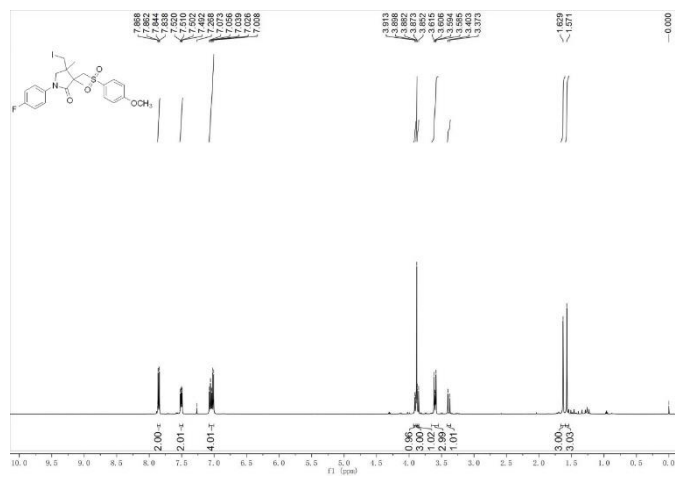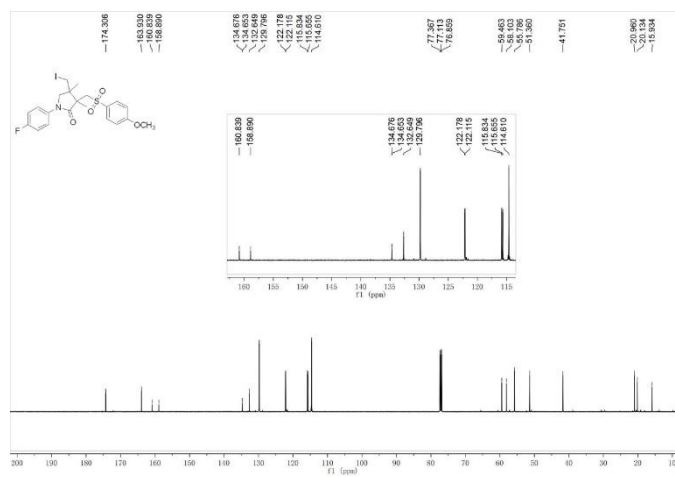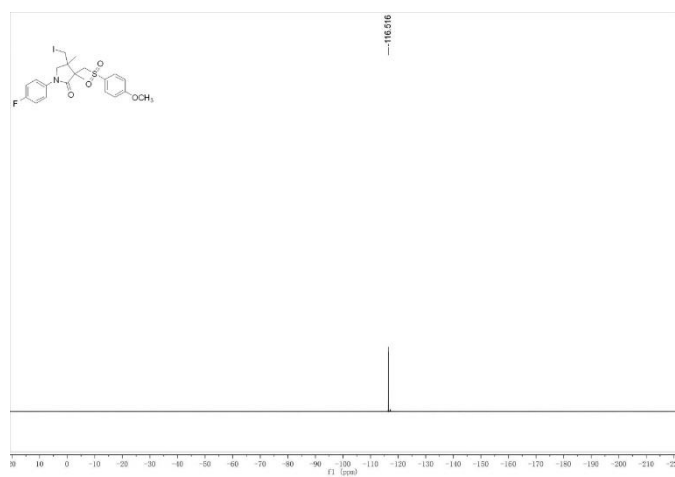

**1-(4-Bromophenyl)-4-(iodomethyl)-3-(((4-methoxyphenyl)sulfonyl)methyl)-3,4-dimethylpyrrolidin-2-one (4t)**

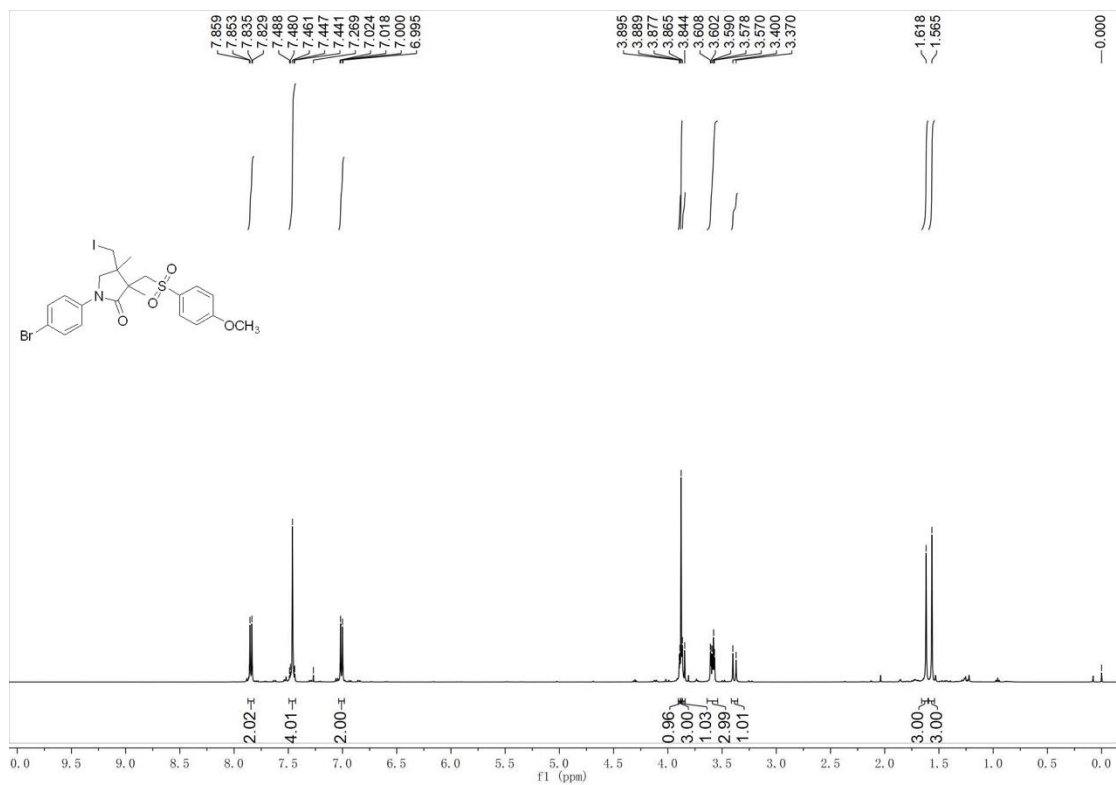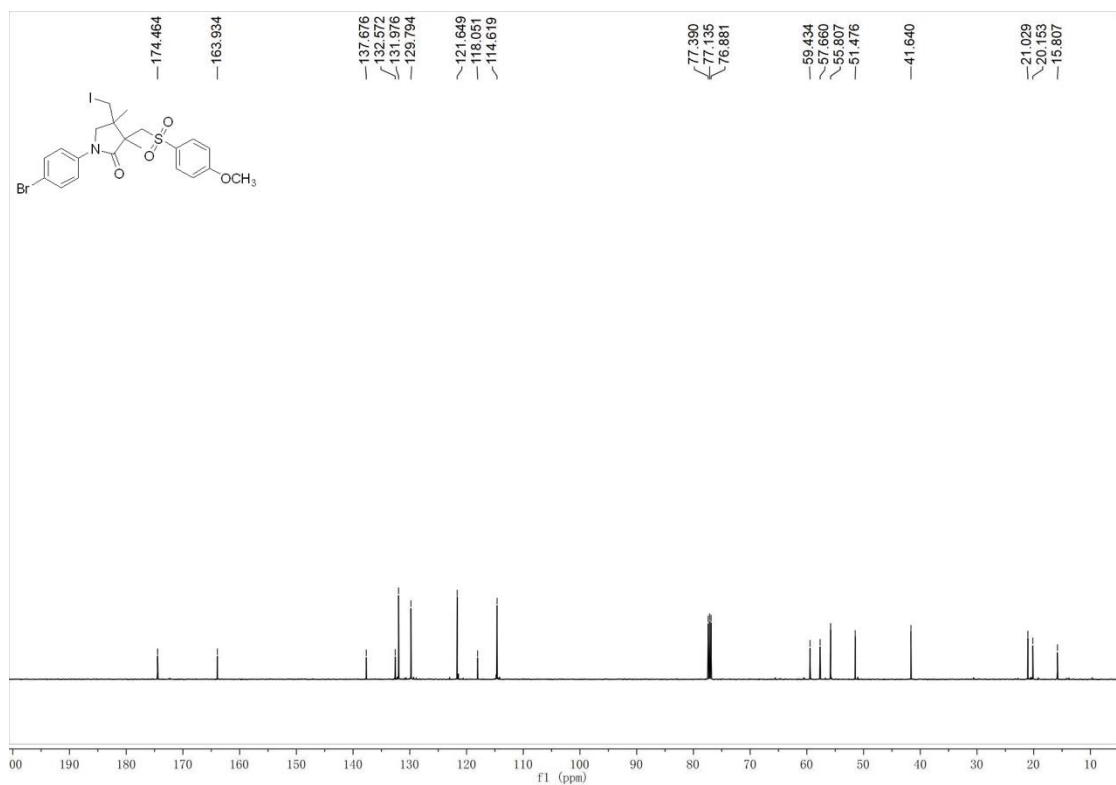

**4-(Iodomethyl)-3-(((4-methoxyphenyl)sulfonyl)methyl)-3,4-dimethyl-1-(*m*-tolyl)pyrrolidin-2-one (4u)**

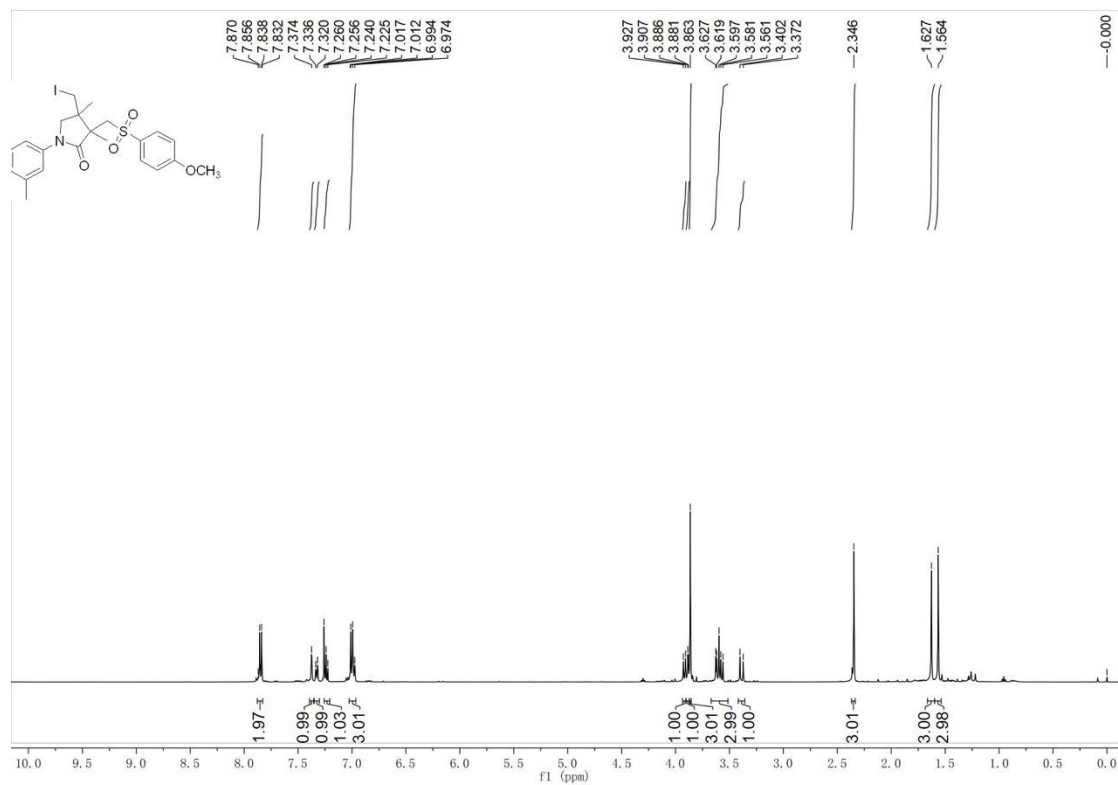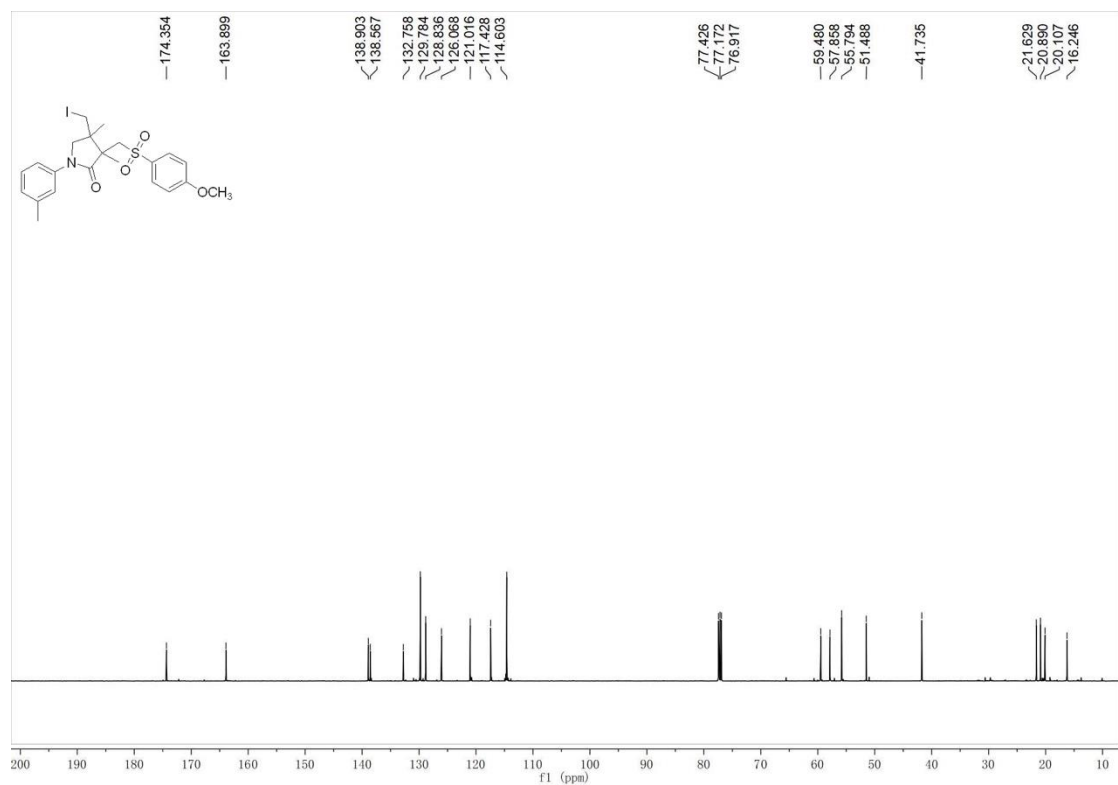

# 3-(((3-Chlorophenyl)sulfonyl)methyl)-1-(4-fluorophenyl)-4-(iodomethyl)-3,4-dimethylpyrrolidin-2-one (4v)

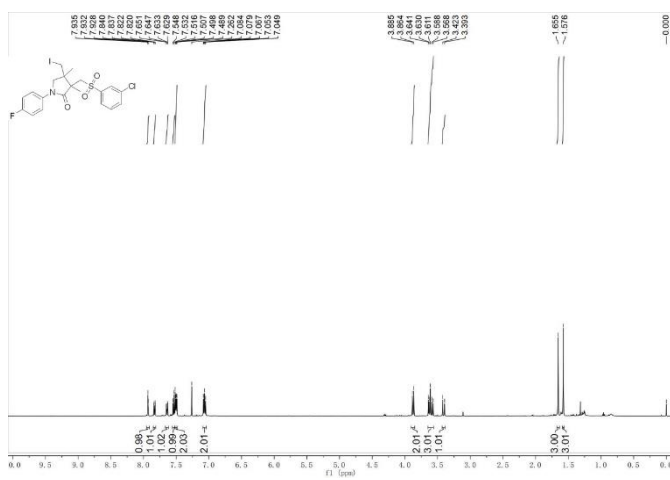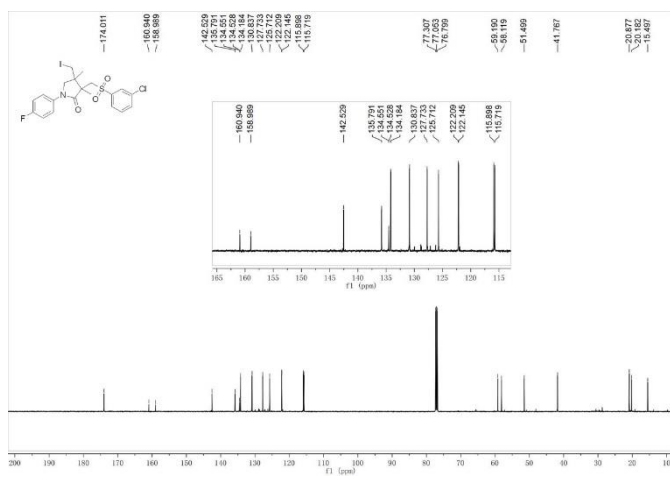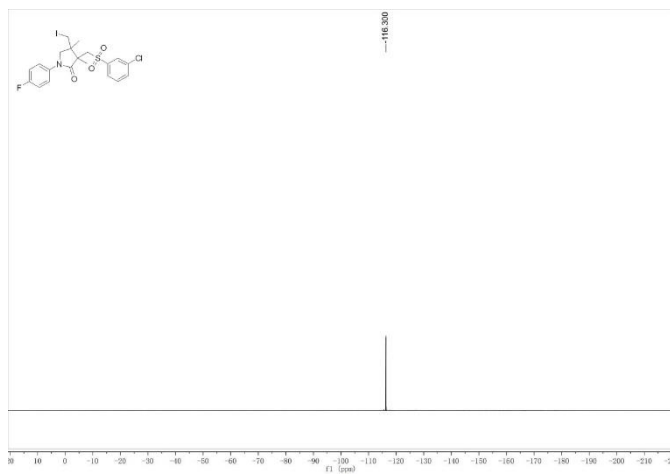

**3-(((3-Chlorophenyl)sulfonyl)methyl)-4-(iodomethyl)-3,4-dimethyl-1-(4-(trifluoromethyl)phenyl)pyrrolidin-2-one (4w)**

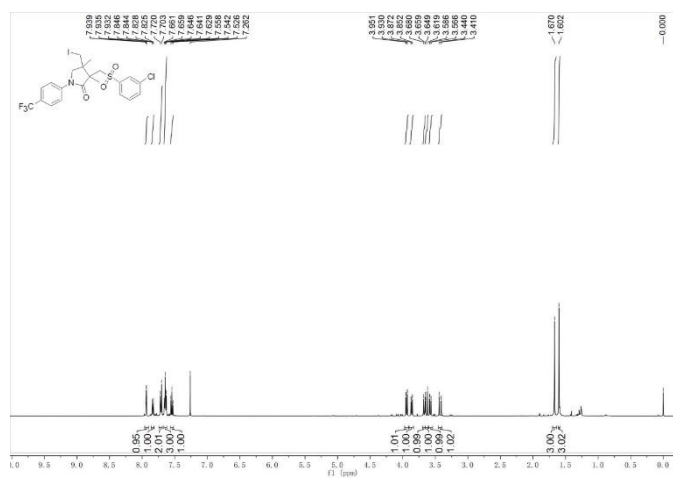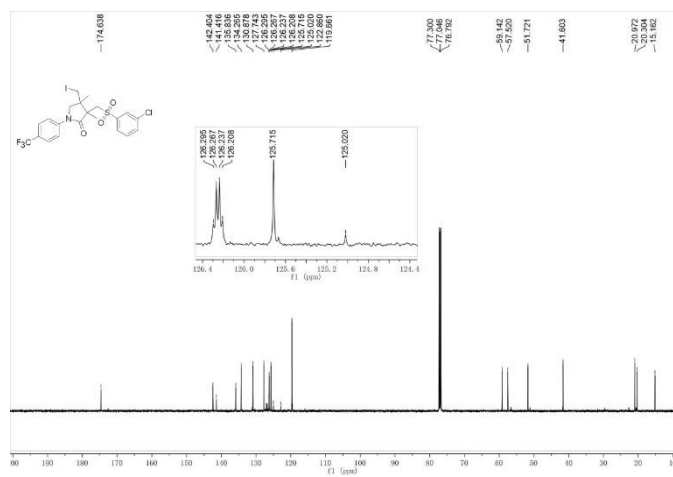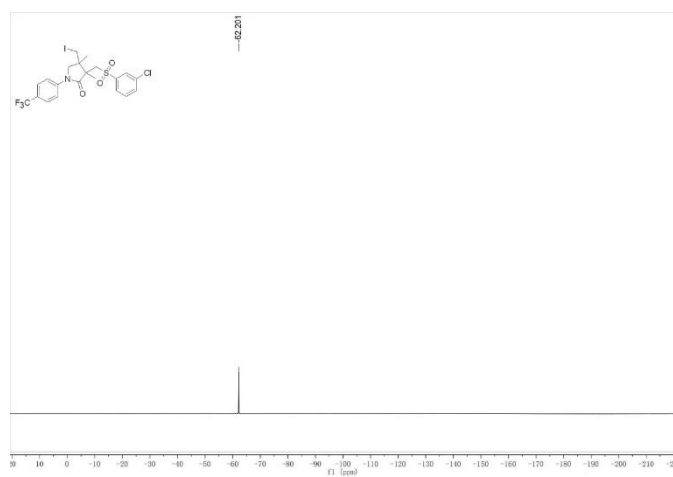

**4-(Iodomethyl)-3-(((4-methoxyphenyl)sulfonyl)methyl)-3,4-dimethyl-1-tosylpyrrolidin-2-one (4x)**

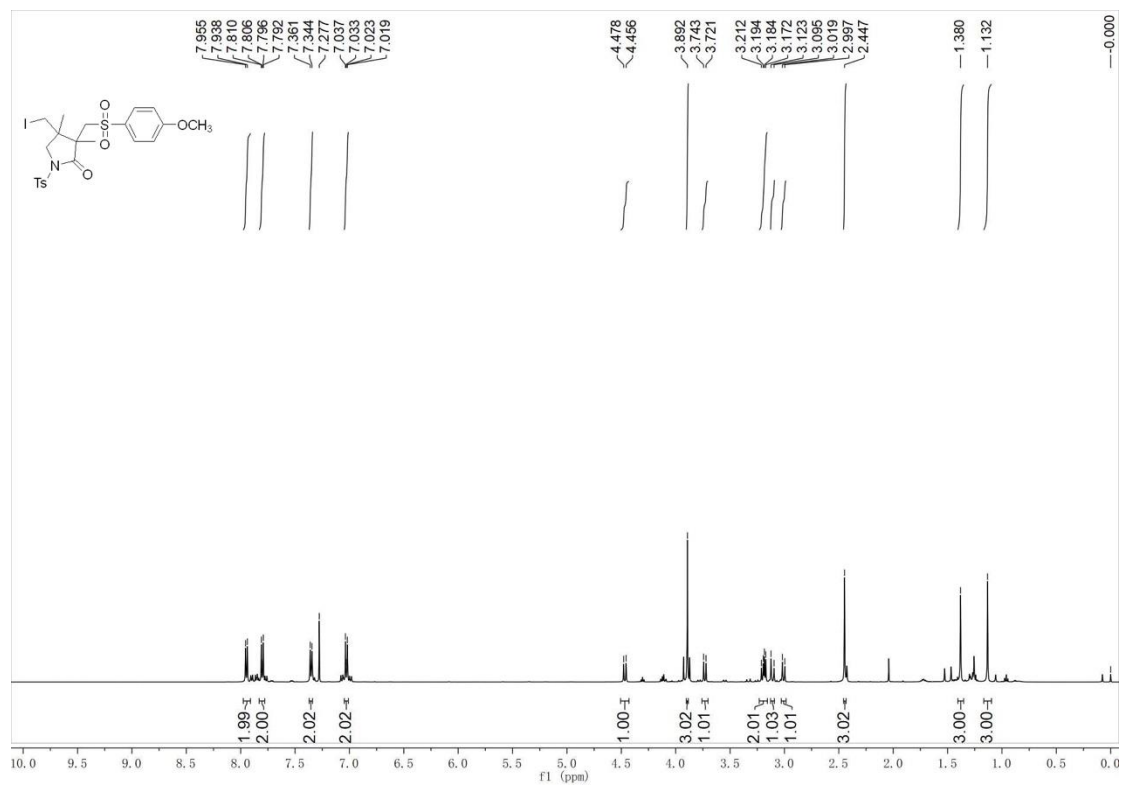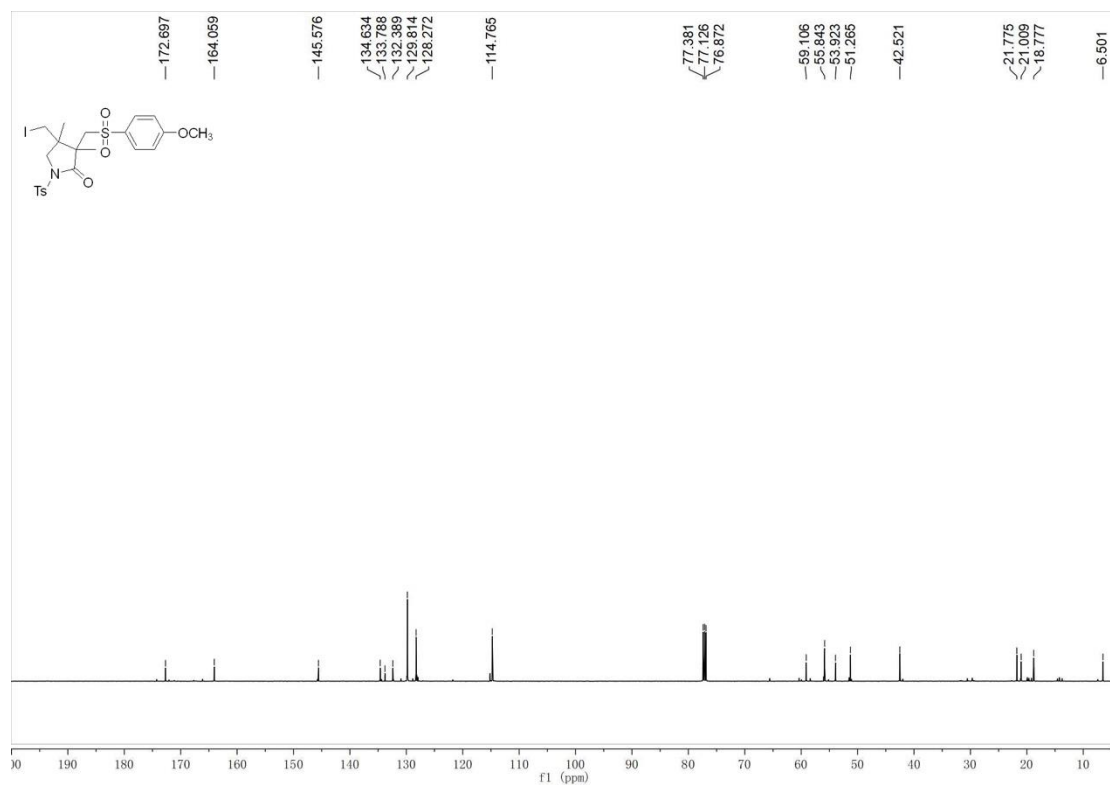



**3-Benzyl-4-(iodomethyl)-3-(((4-methoxyphenyl)sulfonyl)methyl)-4-methyl-1-phenylpyrrolidin-2-one (4y)**

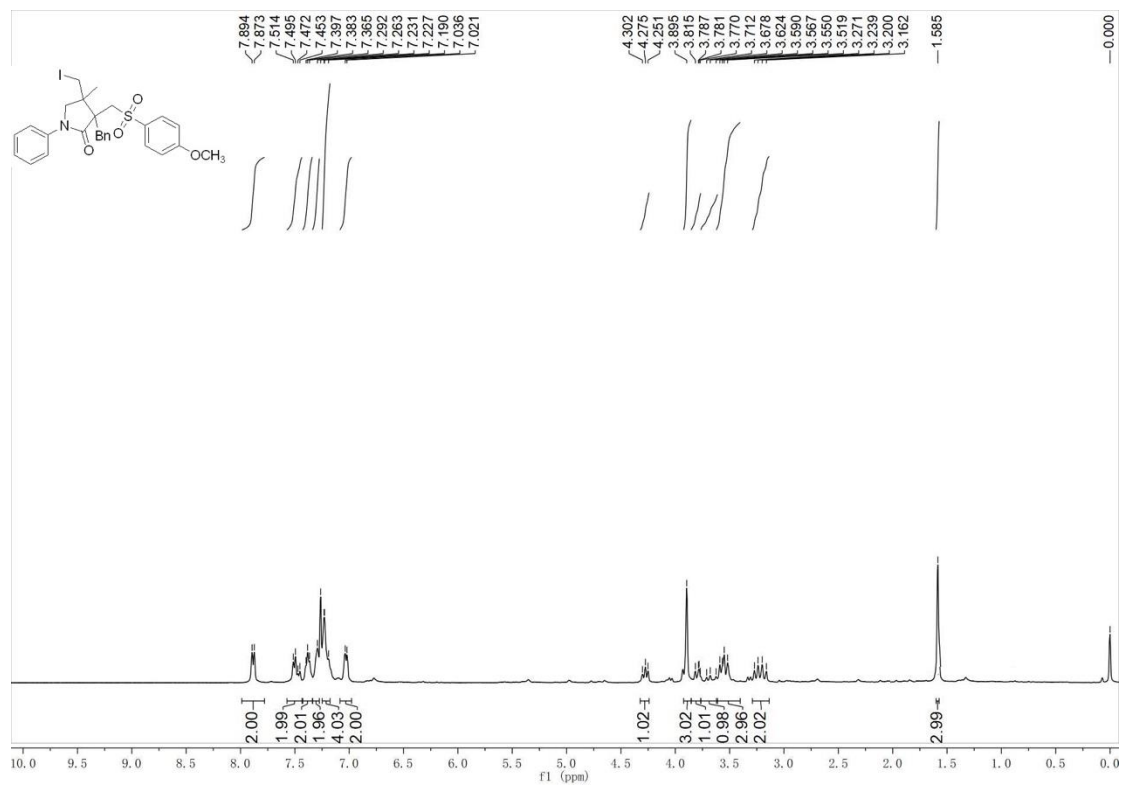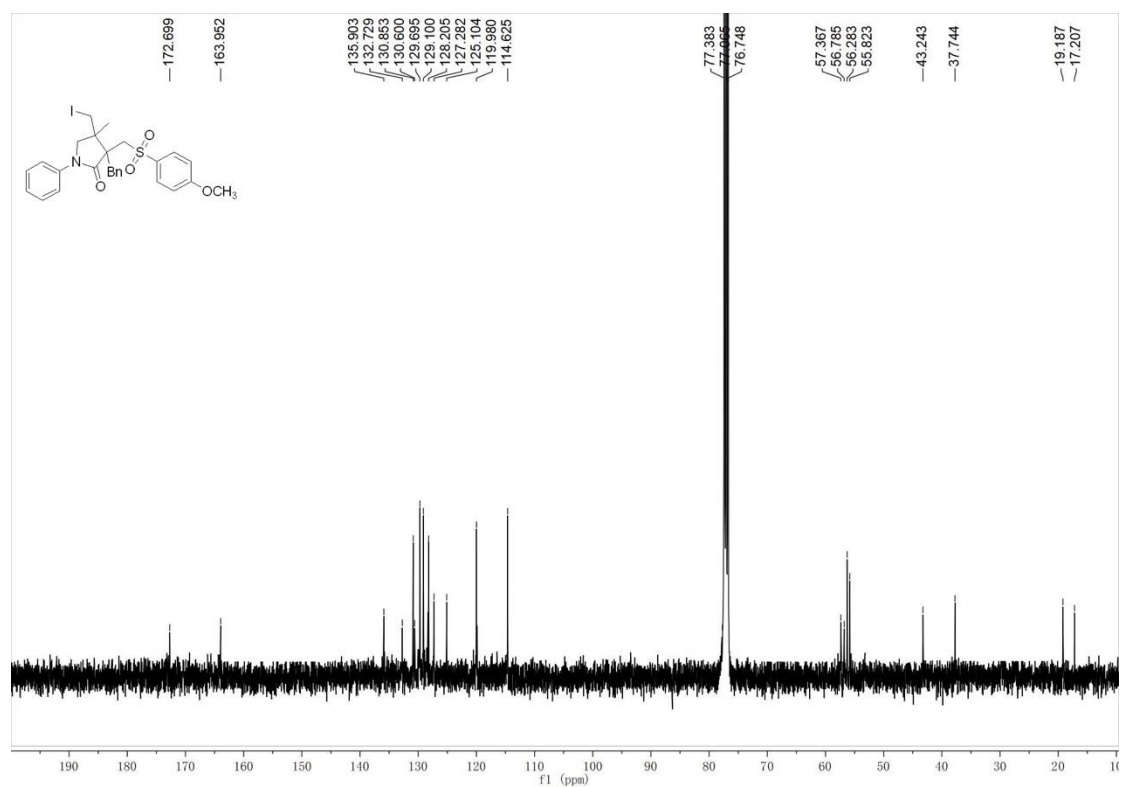

### 4-(Tosylmethyl)-1,2-dihydronaphthalene (5a)

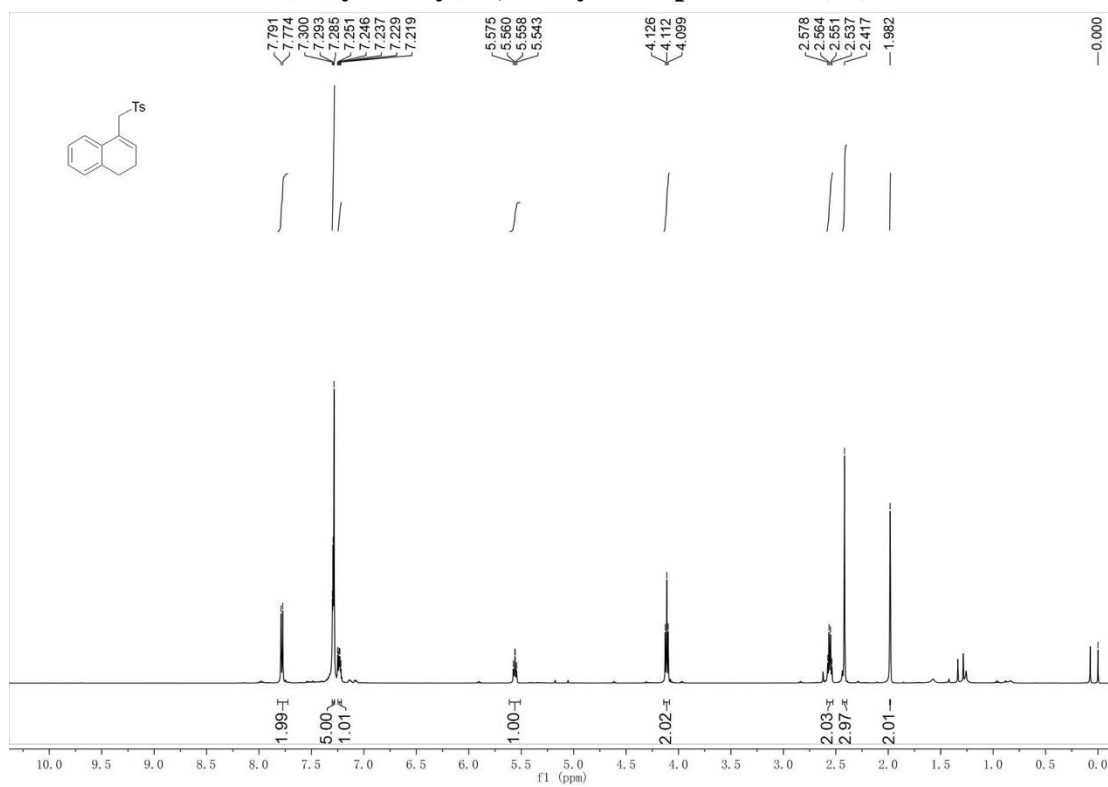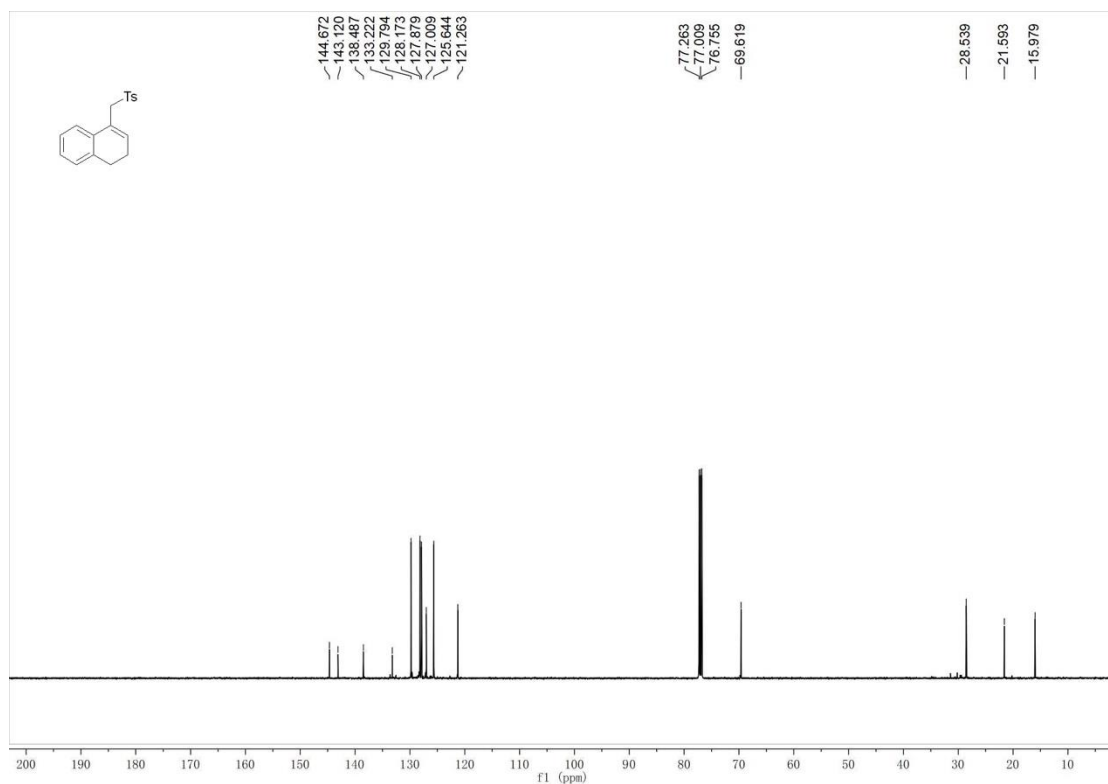

**(E) The X-ray single-crystal diffraction analysis of product 3a**

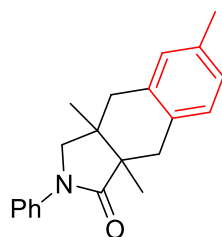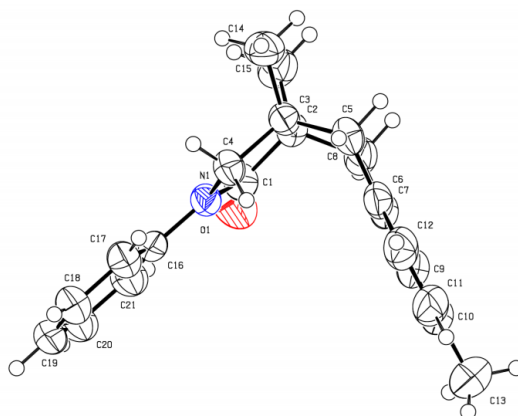

CCDC 2080216

**Table 1. Crystal data and structure refinement for 3a.**

|                                 |                                                                  |                         |
|---------------------------------|------------------------------------------------------------------|-------------------------|
| Identification code             | <b>3a</b>                                                        |                         |
| Empirical formula               | $C_{21}H_{23}NO$                                                 |                         |
| Formula weight                  | 305.40                                                           |                         |
| Temperature                     | 297.0 K                                                          |                         |
| Wavelength                      | 0.71073 Å                                                        |                         |
| Crystal system                  | Monoclinic                                                       |                         |
| Space group                     | P 1 21/c 1                                                       |                         |
| Unit cell dimensions            | $a = 6.747(2)$ Å                                                 | $a = 90^\circ$ .        |
|                                 | $b = 9.863(3)$ Å                                                 | $b = 95.475(9)^\circ$ . |
|                                 | $c = 25.692(7)$ Å                                                | $c = 90^\circ$ .        |
| Volume                          | $1702.0(9)$ Å <sup>3</sup>                                       |                         |
| Z                               | 4                                                                |                         |
| Density (calculated)            | 1.192 Mg/m <sup>3</sup>                                          |                         |
| Absorption coefficient          | 0.072 mm <sup>-1</sup>                                           |                         |
| F(000)                          | 656                                                              |                         |
| Crystal size                    | 0.22 x 0.21 x 0.16 mm <sup>3</sup>                               |                         |
| Theta range for data collection | 2.608 to 25.389°.                                                |                         |
| Index ranges                    | $-8 \leq h \leq 8$ , $-11 \leq k \leq 11$ , $-30 \leq l \leq 30$ |                         |
| Reflections collected           | 17903                                                            |                         |

|                                   |                                             |
|-----------------------------------|---------------------------------------------|
| Independent reflections           | 3124 [R(int) = 0.0273]                      |
| Completeness to theta = 25.242°   | 99.9 %                                      |
| Absorption correction             | Semi-empirical from equivalents             |
| Max. and min. transmission        | 0.7452 and 0.6922                           |
| Refinement method                 | Full-matrix least-squares on F <sup>2</sup> |
| Data / restraints / parameters    | 3124 / 0 / 212                              |
| Goodness-of-fit on F <sup>2</sup> | 1.027                                       |
| Final R indices [I>2sigma(I)]     | R1 = 0.0470, wR2 = 0.1323                   |
| R indices (all data)              | R1 = 0.0573, wR2 = 0.1424                   |
| Extinction coefficient            | 0.021(3)                                    |
| Largest diff. peak and hole       | 0.358 and -0.181 e.Å <sup>-3</sup>          |

**Table 2. Atomic coordinates ( $\times 10^4$ ) and equivalent isotropic displacement parameters ( $\text{\AA}^2 \times 10^3$ )**

for **3a**. U(eq) is defined as one third of the trace of the orthogonalized  $U^{ij}$  tensor.

|       | x        | y        | z       | U(eq)  |
|-------|----------|----------|---------|--------|
| O(1)  | 4782(2)  | 7272(2)  | 6729(1) | 87(1)  |
| N(1)  | 8074(2)  | 7129(1)  | 6569(1) | 44(1)  |
| C(1)  | 6259(2)  | 7736(2)  | 6554(1) | 52(1)  |
| C(2)  | 6302(2)  | 9119(2)  | 6294(1) | 47(1)  |
| C(3)  | 8460(2)  | 9260(2)  | 6128(1) | 45(1)  |
| C(4)  | 9496(2)  | 7920(2)  | 6304(1) | 48(1)  |
| C(5)  | 8464(2)  | 9408(2)  | 5531(1) | 53(1)  |
| C(6)  | 7150(3)  | 8406(2)  | 5229(1) | 53(1)  |
| C(7)  | 5239(2)  | 8252(2)  | 5380(1) | 52(1)  |
| C(8)  | 4702(2)  | 9121(2)  | 5823(1) | 55(1)  |
| C(9)  | 3924(3)  | 7362(2)  | 5108(1) | 66(1)  |
| C(10) | 4457(4)  | 6633(2)  | 4681(1) | 77(1)  |
| C(11) | 6367(4)  | 6788(2)  | 4538(1) | 82(1)  |
| C(12) | 7714(3)  | 7656(2)  | 4810(1) | 70(1)  |
| C(13) | 3002(5)  | 5712(3)  | 4376(1) | 118(1) |
| C(14) | 9624(3)  | 10453(2) | 6385(1) | 64(1)  |
| C(15) | 5703(3)  | 10179(2) | 6688(1) | 67(1)  |
| C(16) | 8629(2)  | 5851(2)  | 6793(1) | 48(1)  |
| C(17) | 10548(3) | 5376(2)  | 6759(1) | 62(1)  |
| C(18) | 11122(4) | 4126(2)  | 6966(1) | 77(1)  |
| C(19) | 9803(4)  | 3345(2)  | 7214(1) | 83(1)  |
| C(20) | 7931(4)  | 3821(2)  | 7257(1) | 82(1)  |
| C(21) | 7315(3)  | 5063(2)  | 7050(1) | 65(1)  |

**Table 3. Bond lengths [ $\text{\AA}$ ] and angles [deg] for 3a.**

---

|              |            |
|--------------|------------|
| O(1)-C(1)    | 1.220(2)   |
| N(1)-C(1)    | 1.361(2)   |
| N(1)-C(4)    | 1.4549(19) |
| N(1)-C(16)   | 1.421(2)   |
| C(1)-C(2)    | 1.521(2)   |
| C(2)-C(3)    | 1.562(2)   |
| C(2)-C(8)    | 1.543(2)   |
| C(2)-C(15)   | 1.536(2)   |
| C(3)-C(4)    | 1.543(2)   |
| C(3)-C(5)    | 1.541(2)   |
| C(3)-C(14)   | 1.529(2)   |
| C(4)-H(4A)   | 0.9700     |
| C(4)-H(4B)   | 0.9700     |
| C(5)-H(5A)   | 0.9700     |
| C(5)-H(5B)   | 0.9700     |
| C(5)-C(6)    | 1.495(2)   |
| C(6)-C(7)    | 1.389(2)   |
| C(6)-C(12)   | 1.389(2)   |
| C(7)-C(8)    | 1.496(2)   |
| C(7)-C(9)    | 1.388(2)   |
| C(8)-H(8A)   | 0.9700     |
| C(8)-H(8B)   | 0.9700     |
| C(9)-H(9)    | 0.9300     |
| C(9)-C(10)   | 1.387(3)   |
| C(10)-C(11)  | 1.382(3)   |
| C(10)-C(13)  | 1.502(3)   |
| C(11)-H(11)  | 0.9300     |
| C(11)-C(12)  | 1.388(3)   |
| C(12)-H(12)  | 0.9300     |
| C(13)-H(13A) | 0.9600     |
| C(13)-H(13B) | 0.9600     |
| C(13)-H(13C) | 0.9600     |
| C(14)-H(14A) | 0.9600     |
| C(14)-H(14B) | 0.9600     |
| C(14)-H(14C) | 0.9600     |
| C(15)-H(15A) | 0.9600     |

|                  |            |
|------------------|------------|
| C(15)-H(15B)     | 0.9600     |
| C(15)-H(15C)     | 0.9600     |
| C(16)-C(17)      | 1.387(3)   |
| C(16)-C(21)      | 1.392(2)   |
| C(17)-H(17)      | 0.9300     |
| C(17)-C(18)      | 1.384(3)   |
| C(18)-H(18)      | 0.9300     |
| C(18)-C(19)      | 1.377(3)   |
| C(19)-H(19)      | 0.9300     |
| C(19)-C(20)      | 1.362(3)   |
| C(20)-H(20)      | 0.9300     |
| C(20)-C(21)      | 1.383(3)   |
| C(21)-H(21)      | 0.9300     |
| C(1)-N(1)-C(4)   | 112.52(13) |
| C(1)-N(1)-C(16)  | 127.13(13) |
| C(16)-N(1)-C(4)  | 120.32(13) |
| O(1)-C(1)-N(1)   | 126.06(16) |
| O(1)-C(1)-C(2)   | 123.32(15) |
| N(1)-C(1)-C(2)   | 110.61(13) |
| C(1)-C(2)-C(3)   | 104.91(12) |
| C(1)-C(2)-C(8)   | 107.74(13) |
| C(1)-C(2)-C(15)  | 107.63(14) |
| C(8)-C(2)-C(3)   | 112.76(13) |
| C(15)-C(2)-C(3)  | 115.46(14) |
| C(15)-C(2)-C(8)  | 107.95(13) |
| C(4)-C(3)-C(2)   | 104.62(12) |
| C(5)-C(3)-C(2)   | 111.70(12) |
| C(5)-C(3)-C(4)   | 109.22(13) |
| C(14)-C(3)-C(2)  | 113.89(13) |
| C(14)-C(3)-C(4)  | 109.48(13) |
| C(14)-C(3)-C(5)  | 107.84(13) |
| N(1)-C(4)-C(3)   | 107.20(12) |
| N(1)-C(4)-H(4A)  | 110.3      |
| N(1)-C(4)-H(4B)  | 110.3      |
| C(3)-C(4)-H(4A)  | 110.3      |
| C(3)-C(4)-H(4B)  | 110.3      |
| H(4A)-C(4)-H(4B) | 108.5      |
| C(3)-C(5)-H(5A)  | 108.9      |

|                     |            |
|---------------------|------------|
| C(3)-C(5)-H(5B)     | 108.9      |
| H(5A)-C(5)-H(5B)    | 107.7      |
| C(6)-C(5)-C(3)      | 113.39(13) |
| C(6)-C(5)-H(5A)     | 108.9      |
| C(6)-C(5)-H(5B)     | 108.9      |
| C(7)-C(6)-C(5)      | 116.60(14) |
| C(7)-C(6)-C(12)     | 119.24(17) |
| C(12)-C(6)-C(5)     | 124.14(17) |
| C(6)-C(7)-C(8)      | 116.60(15) |
| C(9)-C(7)-C(6)      | 119.63(17) |
| C(9)-C(7)-C(8)      | 123.73(17) |
| C(2)-C(8)-H(8A)     | 108.9      |
| C(2)-C(8)-H(8B)     | 108.9      |
| C(7)-C(8)-C(2)      | 113.21(13) |
| C(7)-C(8)-H(8A)     | 108.9      |
| C(7)-C(8)-H(8B)     | 108.9      |
| H(8A)-C(8)-H(8B)    | 107.8      |
| C(7)-C(9)-H(9)      | 119.2      |
| C(10)-C(9)-C(7)     | 121.6(2)   |
| C(10)-C(9)-H(9)     | 119.2      |
| C(9)-C(10)-C(13)    | 121.3(3)   |
| C(11)-C(10)-C(9)    | 118.12(19) |
| C(11)-C(10)-C(13)   | 120.5(2)   |
| C(10)-C(11)-H(11)   | 119.4      |
| C(10)-C(11)-C(12)   | 121.16(19) |
| C(12)-C(11)-H(11)   | 119.4      |
| C(6)-C(12)-H(12)    | 119.9      |
| C(11)-C(12)-C(6)    | 120.2(2)   |
| C(11)-C(12)-H(12)   | 119.9      |
| C(10)-C(13)-H(13A)  | 109.5      |
| C(10)-C(13)-H(13B)  | 109.5      |
| C(10)-C(13)-H(13C)  | 109.5      |
| H(13A)-C(13)-H(13B) | 109.5      |
| H(13A)-C(13)-H(13C) | 109.5      |
| H(13B)-C(13)-H(13C) | 109.5      |
| C(3)-C(14)-H(14A)   | 109.5      |
| C(3)-C(14)-H(14B)   | 109.5      |
| C(3)-C(14)-H(14C)   | 109.5      |



|                     |            |
|---------------------|------------|
| H(14A)-C(14)-H(14B) | 109.5      |
| H(14A)-C(14)-H(14C) | 109.5      |
| H(14B)-C(14)-H(14C) | 109.5      |
| C(2)-C(15)-H(15A)   | 109.5      |
| C(2)-C(15)-H(15B)   | 109.5      |
| C(2)-C(15)-H(15C)   | 109.5      |
| H(15A)-C(15)-H(15B) | 109.5      |
| H(15A)-C(15)-H(15C) | 109.5      |
| H(15B)-C(15)-H(15C) | 109.5      |
| C(17)-C(16)-N(1)    | 119.01(14) |
| C(17)-C(16)-C(21)   | 118.83(16) |
| C(21)-C(16)-N(1)    | 122.16(16) |
| C(16)-C(17)-H(17)   | 119.8      |
| C(18)-C(17)-C(16)   | 120.31(19) |
| C(18)-C(17)-H(17)   | 119.8      |
| C(17)-C(18)-H(18)   | 119.8      |
| C(19)-C(18)-C(17)   | 120.4(2)   |
| C(19)-C(18)-H(18)   | 119.8      |
| C(18)-C(19)-H(19)   | 120.3      |
| C(20)-C(19)-C(18)   | 119.32(19) |
| C(20)-C(19)-H(19)   | 120.3      |
| C(19)-C(20)-H(20)   | 119.3      |
| C(19)-C(20)-C(21)   | 121.4(2)   |
| C(21)-C(20)-H(20)   | 119.3      |
| C(16)-C(21)-H(21)   | 120.2      |
| C(20)-C(21)-C(16)   | 119.6(2)   |
| C(20)-C(21)-H(21)   | 120.2      |

---

Symmetry transformations used to generate equivalent atoms:

**Table 4. Anisotropic displacement parameters ( $\text{\AA}^2 \times 10^3$ ) for 3a.**

The anisotropic displacement factor exponent takes the form:  $-2p^2[ h^2 a^{*2}U^{11} + \dots + 2 h k a^* b^* U^{12} ]$

|       | $U^{11}$ | $U^{22}$ | $U^{33}$ | $U^{23}$ | $U^{13}$ | $U^{12}$ |
|-------|----------|----------|----------|----------|----------|----------|
| O(1)  | 55(1)    | 92(1)    | 118(1)   | 33(1)    | 25(1)    | -4(1)    |
| N(1)  | 46(1)    | 43(1)    | 43(1)    | 5(1)     | 1(1)     | -4(1)    |
| C(1)  | 45(1)    | 59(1)    | 52(1)    | 5(1)     | 5(1)     | -4(1)    |
| C(2)  | 45(1)    | 51(1)    | 44(1)    | 1(1)     | 2(1)     | 4(1)     |
| C(3)  | 46(1)    | 43(1)    | 47(1)    | 5(1)     | 2(1)     | 0(1)     |
| C(4)  | 45(1)    | 49(1)    | 50(1)    | 9(1)     | 5(1)     | 0(1)     |
| C(5)  | 57(1)    | 53(1)    | 51(1)    | 14(1)    | 6(1)     | 1(1)     |
| C(6)  | 65(1)    | 53(1)    | 40(1)    | 10(1)    | 1(1)     | 8(1)     |
| C(7)  | 57(1)    | 53(1)    | 45(1)    | 5(1)     | -9(1)    | 8(1)     |
| C(8)  | 48(1)    | 63(1)    | 54(1)    | 0(1)     | -3(1)    | 9(1)     |
| C(9)  | 67(1)    | 65(1)    | 62(1)    | 2(1)     | -18(1)   | 4(1)     |
| C(10) | 106(2)   | 60(1)    | 59(1)    | -4(1)    | -28(1)   | 10(1)    |
| C(11) | 120(2)   | 73(1)    | 50(1)    | -8(1)    | -4(1)    | 25(1)    |
| C(12) | 89(1)    | 76(1)    | 46(1)    | 6(1)     | 9(1)     | 17(1)    |
| C(13) | 160(3)   | 87(2)    | 95(2)    | -19(2)   | -50(2)   | 1(2)     |
| C(14) | 61(1)    | 54(1)    | 75(1)    | -3(1)    | 0(1)     | -7(1)    |
| C(15) | 66(1)    | 74(1)    | 60(1)    | -12(1)   | 6(1)     | 8(1)     |
| C(16) | 64(1)    | 42(1)    | 36(1)    | 1(1)     | -6(1)    | -6(1)    |
| C(17) | 66(1)    | 52(1)    | 65(1)    | 7(1)     | -8(1)    | 2(1)     |
| C(18) | 95(2)    | 55(1)    | 77(1)    | 5(1)     | -19(1)   | 12(1)    |
| C(19) | 147(2)   | 45(1)    | 52(1)    | 4(1)     | -16(1)   | 3(1)     |
| C(20) | 135(2)   | 55(1)    | 55(1)    | 11(1)    | 11(1)    | -18(1)   |
| C(21) | 88(1)    | 54(1)    | 53(1)    | 7(1)     | 10(1)    | -11(1)   |

**Table 5. Hydrogen coordinates (  $\times 10^4$ ) and isotropic displacement parameters ( $\text{\AA}^2 \times 10^{-3}$ )  
for 3a.**

|        | x     | y     | z    | U(eq) |
|--------|-------|-------|------|-------|
| H(4A)  | 9891  | 7427  | 6004 | 57    |
| H(4B)  | 10677 | 8102  | 6540 | 57    |
| H(5A)  | 8031  | 10316 | 5431 | 64    |
| H(5B)  | 9816  | 9298  | 5439 | 64    |
| H(8A)  | 3455  | 8802  | 5937 | 66    |
| H(8B)  | 4500  | 10044 | 5699 | 66    |
| H(9)   | 2654  | 7253  | 5214 | 79    |
| H(11)  | 6757  | 6301  | 4255 | 98    |
| H(12)  | 8999  | 7737  | 4711 | 84    |
| H(13A) | 2181  | 5272  | 4610 | 177   |
| H(13B) | 3715  | 5041  | 4197 | 177   |
| H(13C) | 2179  | 6235  | 4125 | 177   |
| H(14A) | 8926  | 11282 | 6296 | 96    |
| H(14B) | 10923 | 10488 | 6262 | 96    |
| H(14C) | 9754  | 10338 | 6757 | 96    |
| H(15A) | 4397  | 9974  | 6785 | 100   |
| H(15B) | 5698  | 11064 | 6532 | 100   |
| H(15C) | 6640  | 10163 | 6994 | 100   |
| H(17)  | 11453 | 5901  | 6596 | 75    |
| H(18)  | 12407 | 3811  | 6939 | 93    |
| H(19)  | 10187 | 2501  | 7350 | 99    |
| H(20)  | 7048  | 3300  | 7429 | 98    |
| H(21)  | 6030  | 5370  | 7083 | 78    |

**Table 6. Torsion angles [°] for 3a.**

---

|                        |             |
|------------------------|-------------|
| O(1)-C(1)-C(2)-C(3)    | -179.05(17) |
| O(1)-C(1)-C(2)-C(8)    | -58.7(2)    |
| O(1)-C(1)-C(2)-C(15)   | 57.5(2)     |
| N(1)-C(1)-C(2)-C(3)    | 1.86(17)    |
| N(1)-C(1)-C(2)-C(8)    | 122.22(14)  |
| N(1)-C(1)-C(2)-C(15)   | -121.60(15) |
| N(1)-C(16)-C(17)-C(18) | -179.02(15) |
| N(1)-C(16)-C(21)-C(20) | 179.41(15)  |
| C(1)-N(1)-C(4)-C(3)    | 4.06(17)    |
| C(1)-N(1)-C(16)-C(17)  | 178.36(15)  |
| C(1)-N(1)-C(16)-C(21)  | -2.3(2)     |
| C(1)-C(2)-C(3)-C(4)    | 0.56(15)    |
| C(1)-C(2)-C(3)-C(5)    | 118.60(14)  |
| C(1)-C(2)-C(3)-C(14)   | -118.93(14) |
| C(1)-C(2)-C(8)-C(7)    | -71.15(18)  |
| C(2)-C(3)-C(4)-N(1)    | -2.62(15)   |
| C(2)-C(3)-C(5)-C(6)    | -46.56(18)  |
| C(3)-C(2)-C(8)-C(7)    | 44.12(19)   |
| C(3)-C(5)-C(6)-C(7)    | 47.45(19)   |
| C(3)-C(5)-C(6)-C(12)   | -133.75(17) |
| C(4)-N(1)-C(1)-O(1)    | 177.17(17)  |
| C(4)-N(1)-C(1)-C(2)    | -3.77(18)   |
| C(4)-N(1)-C(16)-C(17)  | 0.5(2)      |
| C(4)-N(1)-C(16)-C(21)  | 179.88(14)  |
| C(4)-C(3)-C(5)-C(6)    | 68.68(17)   |
| C(5)-C(3)-C(4)-N(1)    | -122.33(13) |
| C(5)-C(6)-C(7)-C(8)    | 0.8(2)      |
| C(5)-C(6)-C(7)-C(9)    | 178.45(14)  |
| C(5)-C(6)-C(12)-C(11)  | -177.39(16) |
| C(6)-C(7)-C(8)-C(2)    | -47.4(2)    |
| C(6)-C(7)-C(9)-C(10)   | -1.1(3)     |
| C(7)-C(6)-C(12)-C(11)  | 1.4(3)      |
| C(7)-C(9)-C(10)-C(11)  | 1.5(3)      |
| C(7)-C(9)-C(10)-C(13)  | -177.63(19) |
| C(8)-C(2)-C(3)-C(4)    | -116.41(14) |
| C(8)-C(2)-C(3)-C(5)    | 1.63(18)    |

|                         |             |
|-------------------------|-------------|
| C(8)-C(2)-C(3)-C(14)    | 124.10(15)  |
| C(8)-C(7)-C(9)-C(10)    | 176.40(16)  |
| C(9)-C(7)-C(8)-C(2)     | 135.06(17)  |
| C(9)-C(10)-C(11)-C(12)  | -0.5(3)     |
| C(10)-C(11)-C(12)-C(6)  | -0.9(3)     |
| C(12)-C(6)-C(7)-C(8)    | -178.06(15) |
| C(12)-C(6)-C(7)-C(9)    | -0.4(2)     |
| C(13)-C(10)-C(11)-C(12) | 178.6(2)    |
| C(14)-C(3)-C(4)-N(1)    | 119.80(14)  |
| C(14)-C(3)-C(5)-C(6)    | -172.43(13) |
| C(15)-C(2)-C(3)-C(4)    | 118.85(15)  |
| C(15)-C(2)-C(3)-C(5)    | -123.12(15) |
| C(15)-C(2)-C(3)-C(14)   | -0.64(19)   |
| C(15)-C(2)-C(8)-C(7)    | 172.88(15)  |
| C(16)-N(1)-C(1)-O(1)    | -0.8(3)     |
| C(16)-N(1)-C(1)-C(2)    | 178.23(13)  |
| C(16)-N(1)-C(4)-C(3)    | -177.79(12) |
| C(16)-C(17)-C(18)-C(19) | -0.7(3)     |
| C(17)-C(16)-C(21)-C(20) | -1.2(3)     |
| C(17)-C(18)-C(19)-C(20) | -0.6(3)     |
| C(18)-C(19)-C(20)-C(21) | 1.0(3)      |
| C(19)-C(20)-C(21)-C(16) | -0.1(3)     |
| C(21)-C(16)-C(17)-C(18) | 1.6(3)      |

---

Symmetry transformations used to generate equivalent atoms:

**Table 7. Hydrogen bonds for 3a [ $\text{\AA}$  and  $^\circ$ ].**

---

| D-H...A | d(D-H) | d(H...A) | d(D...A) | $\angle(\text{DHA})$ |
|---------|--------|----------|----------|----------------------|
|---------|--------|----------|----------|----------------------|

---
